# Supplementary material for: A systems serology approach to identifying key antibody correlates of protection from cerebral malaria in Malawian children
Source: PubMed Central journal article supplement (PMC11396342; doi:10.1186/s12916-024-03604-8), 2024-09-12
Supplement: 12916_2024_3604_MOESM2_ESM.pdf [file 12916_2024_3604_MOESM2_ESM.pdf]

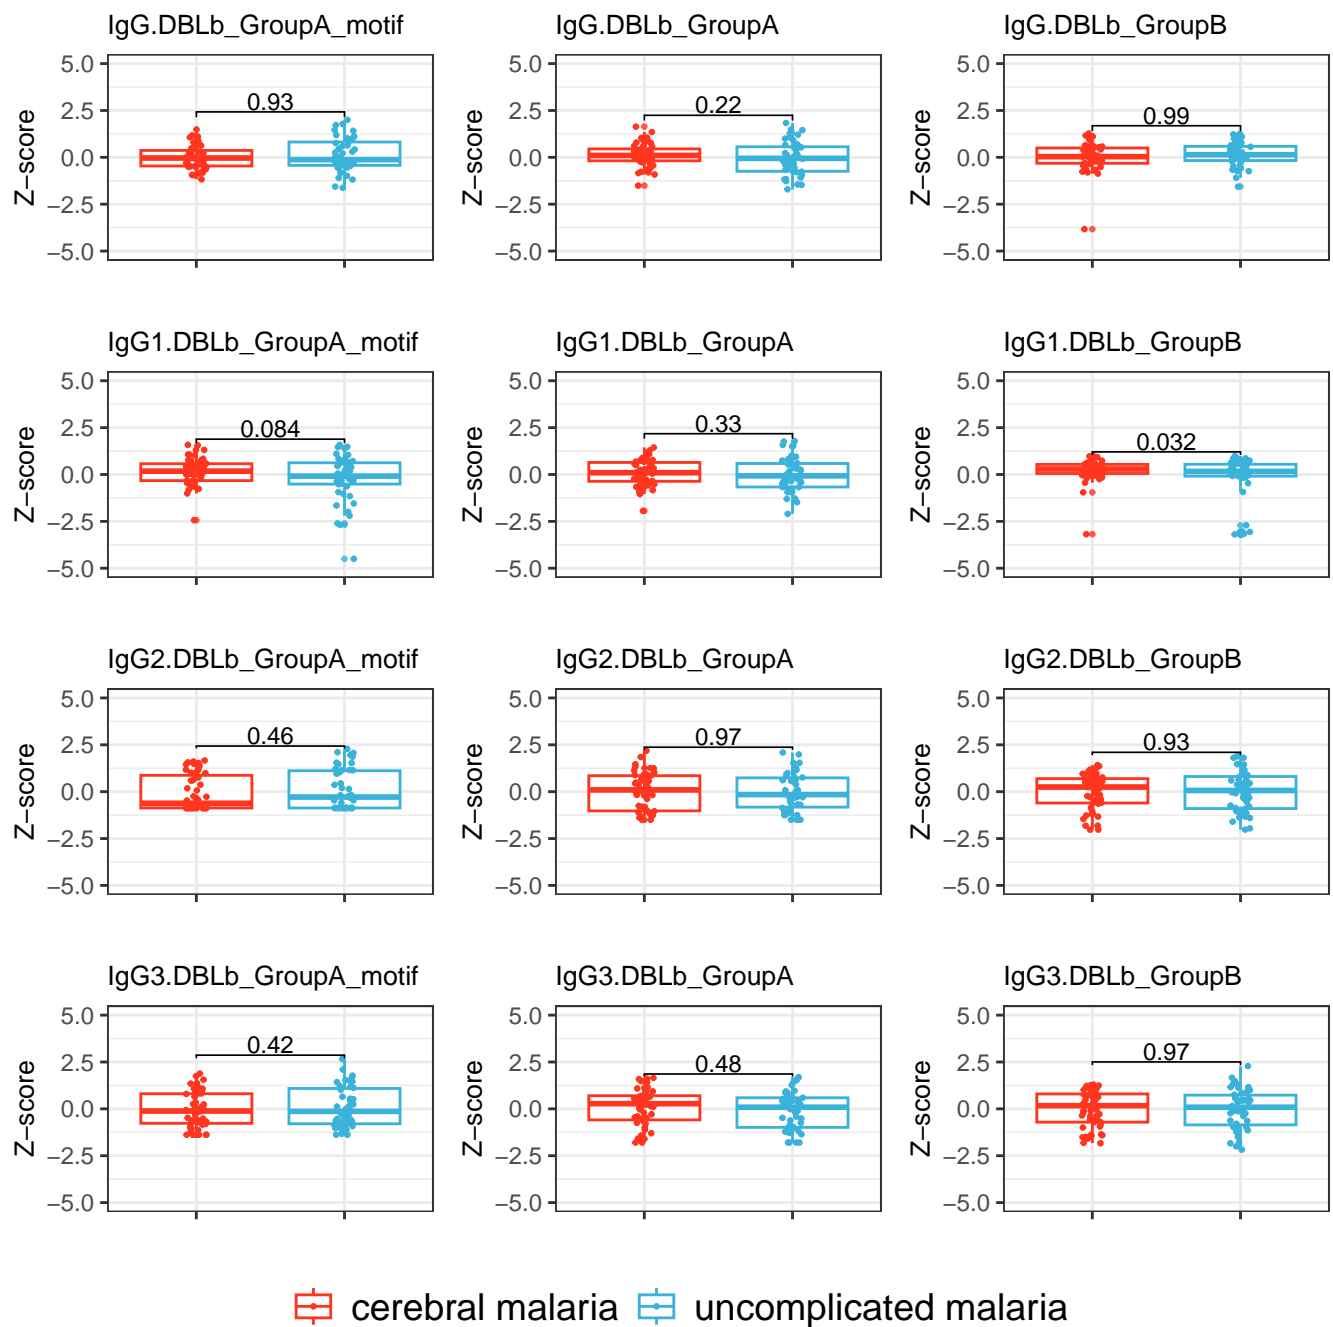

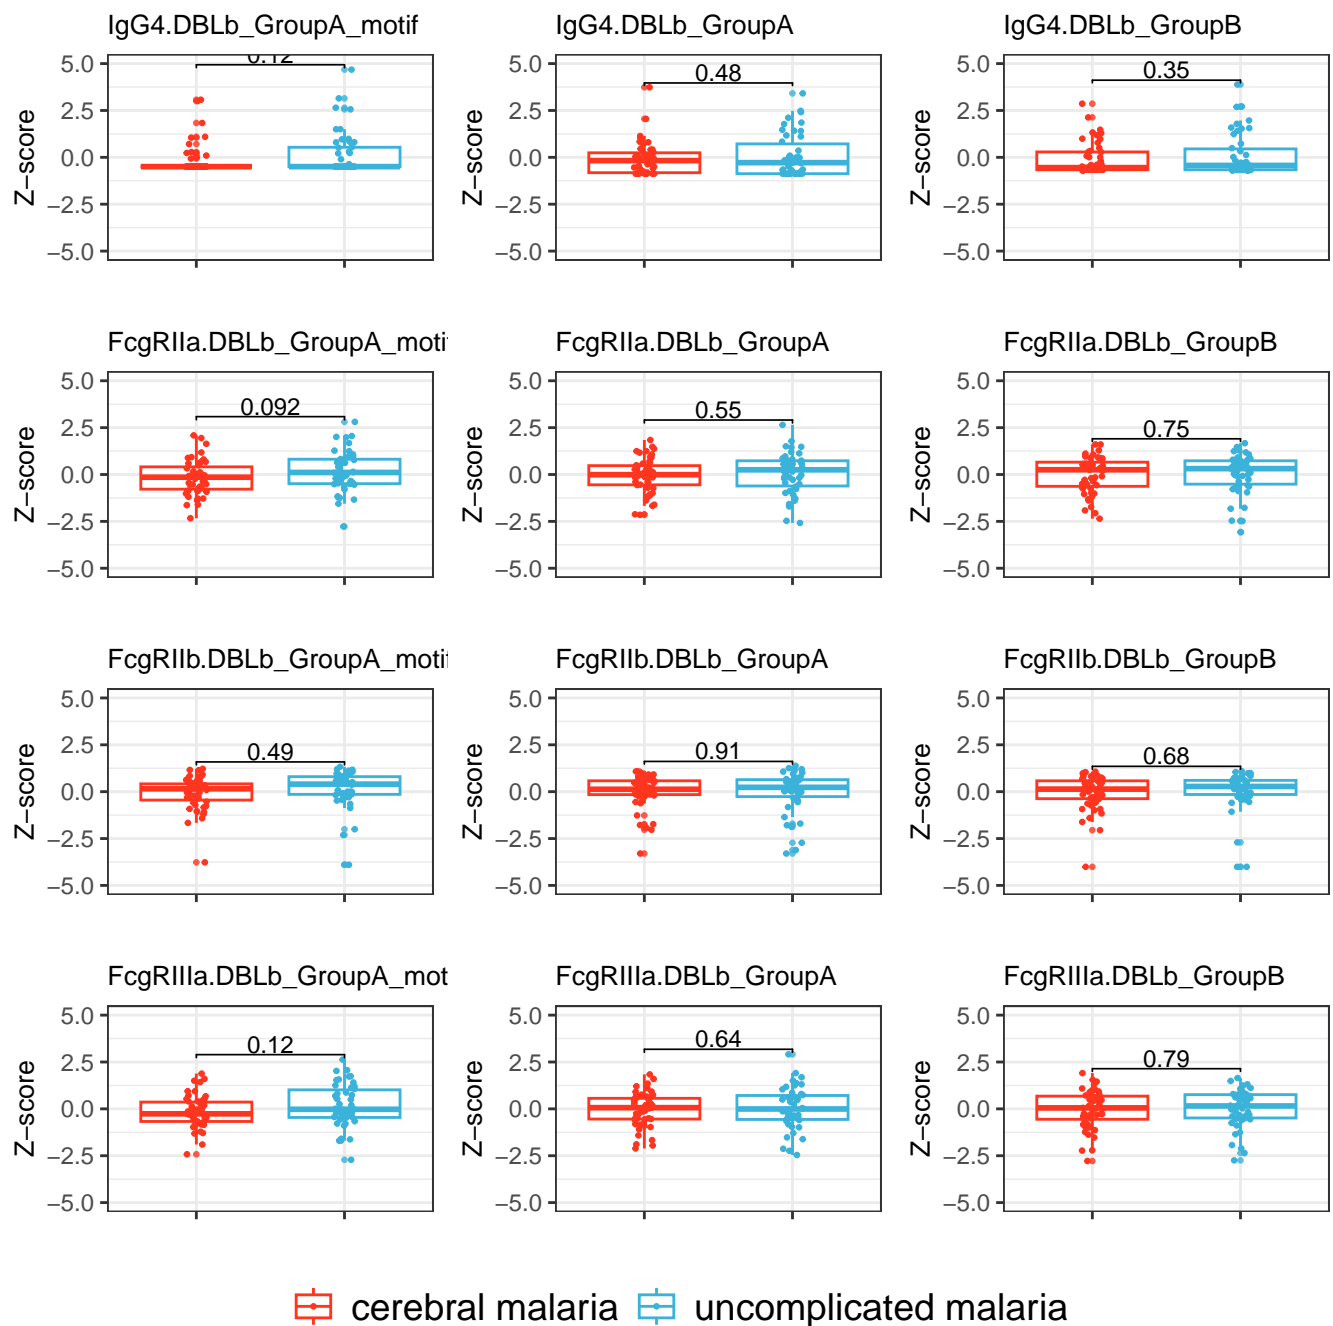

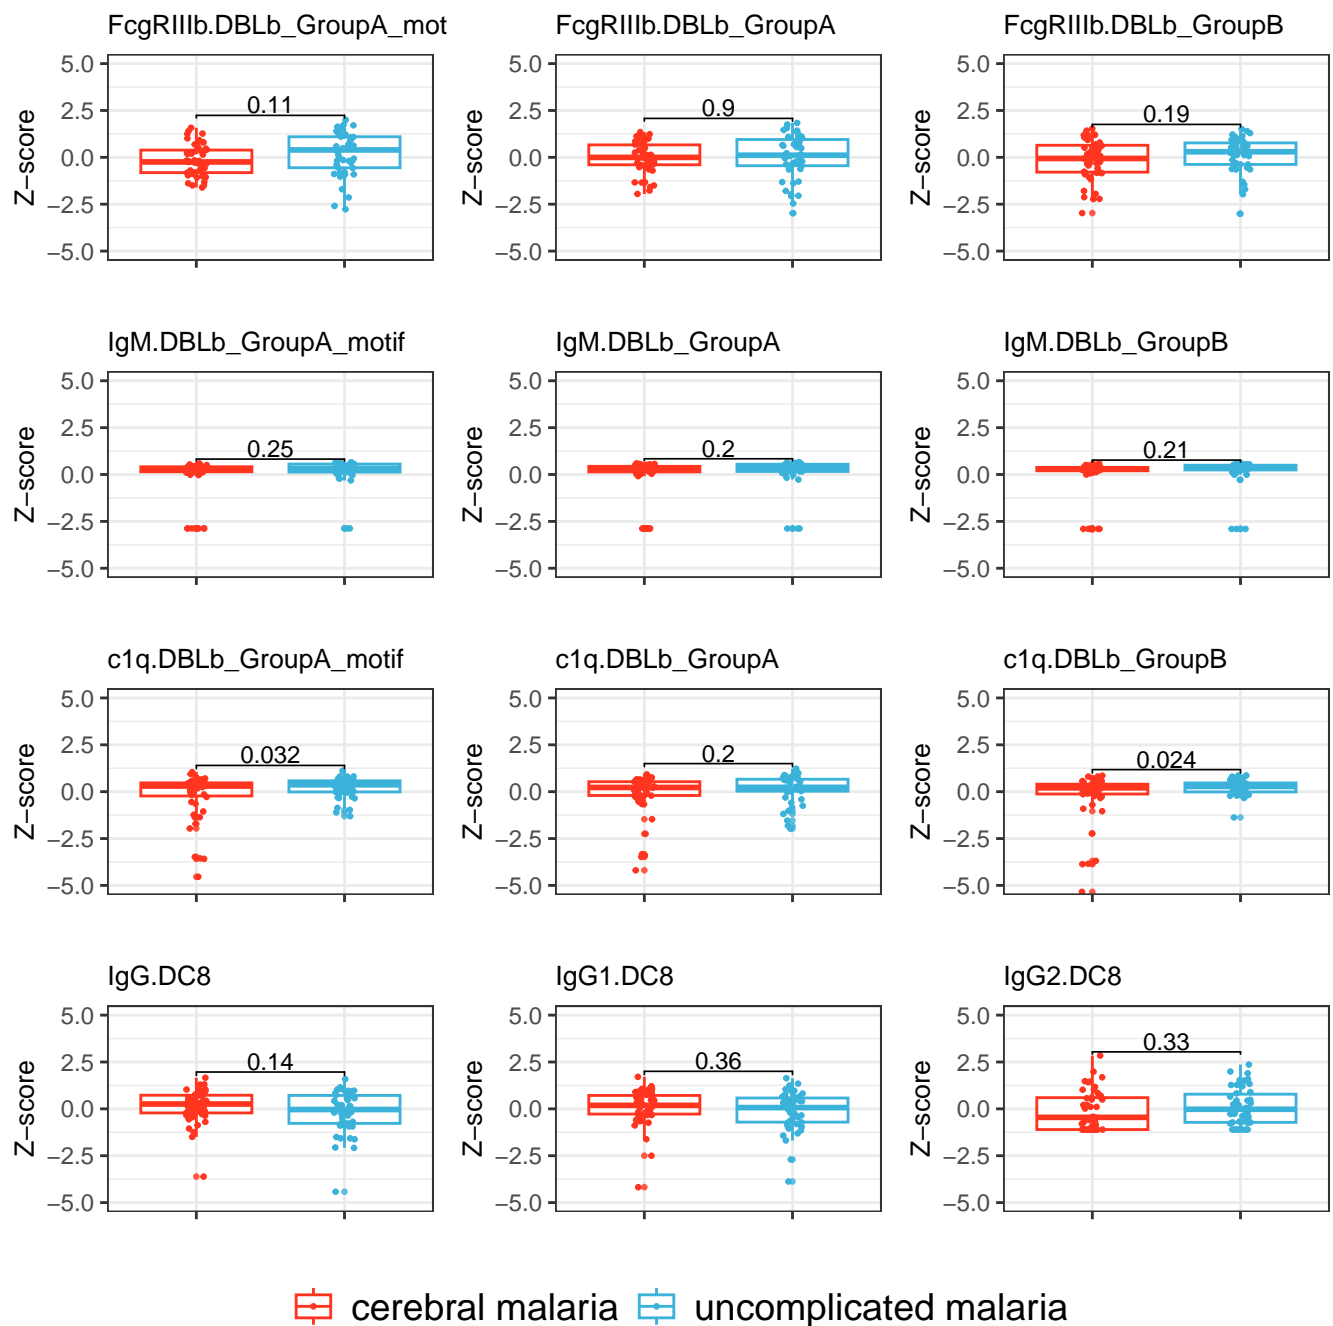

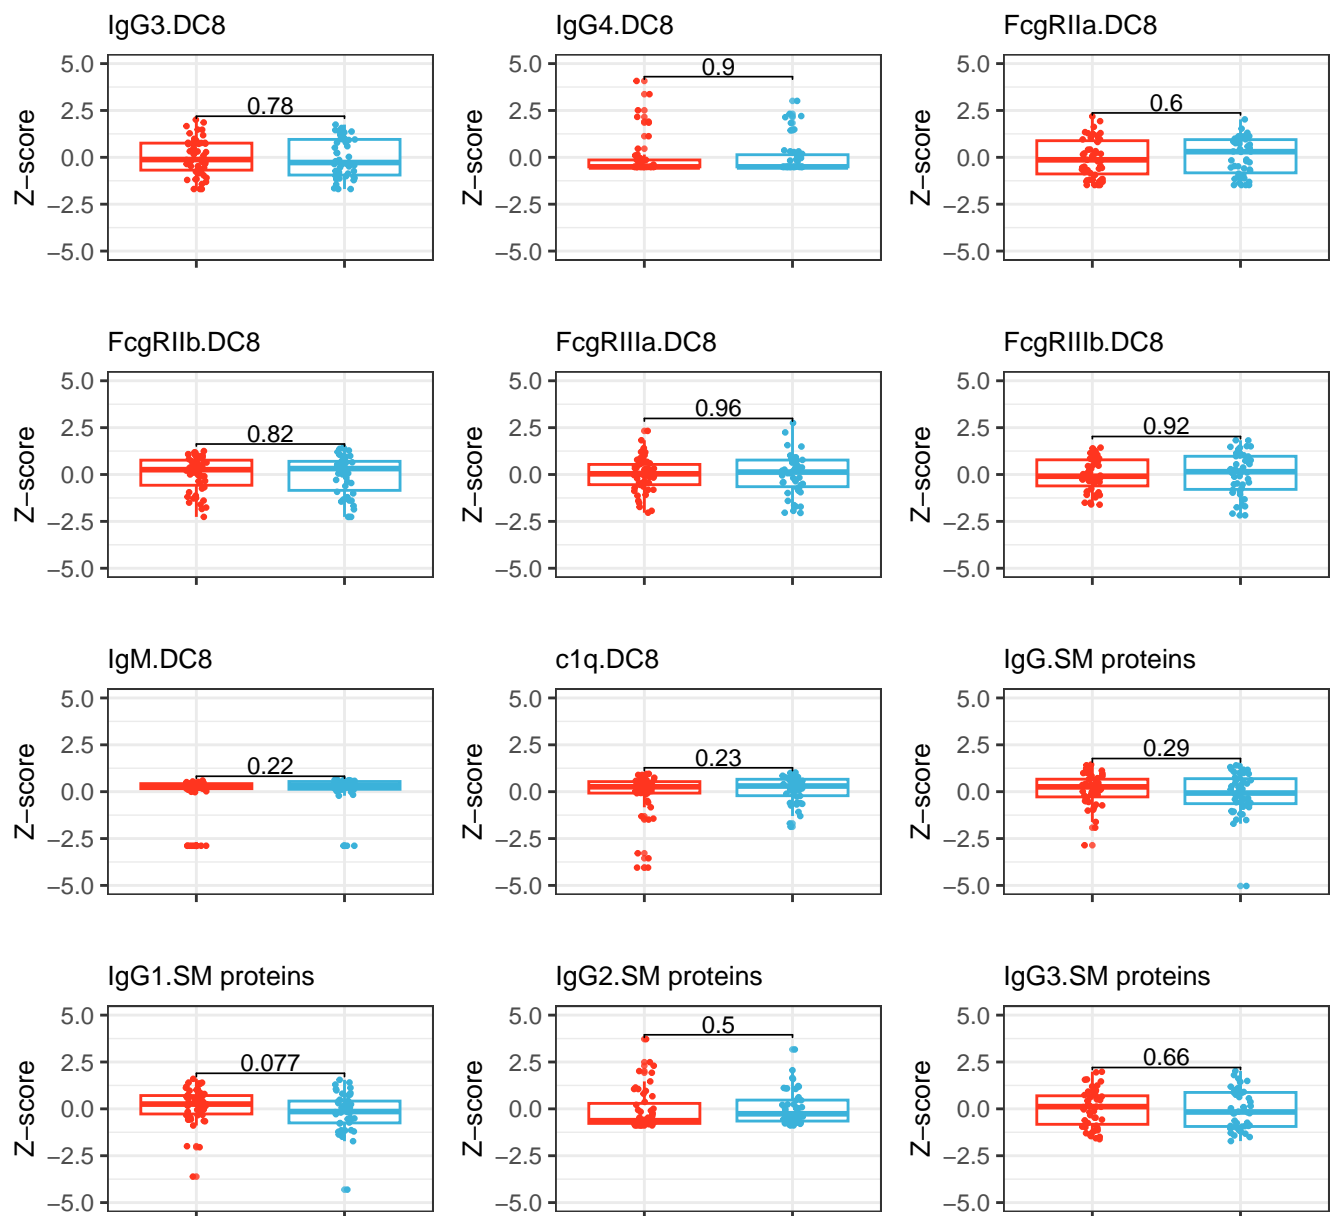

 cerebral malaria
  uncomplicated malaria

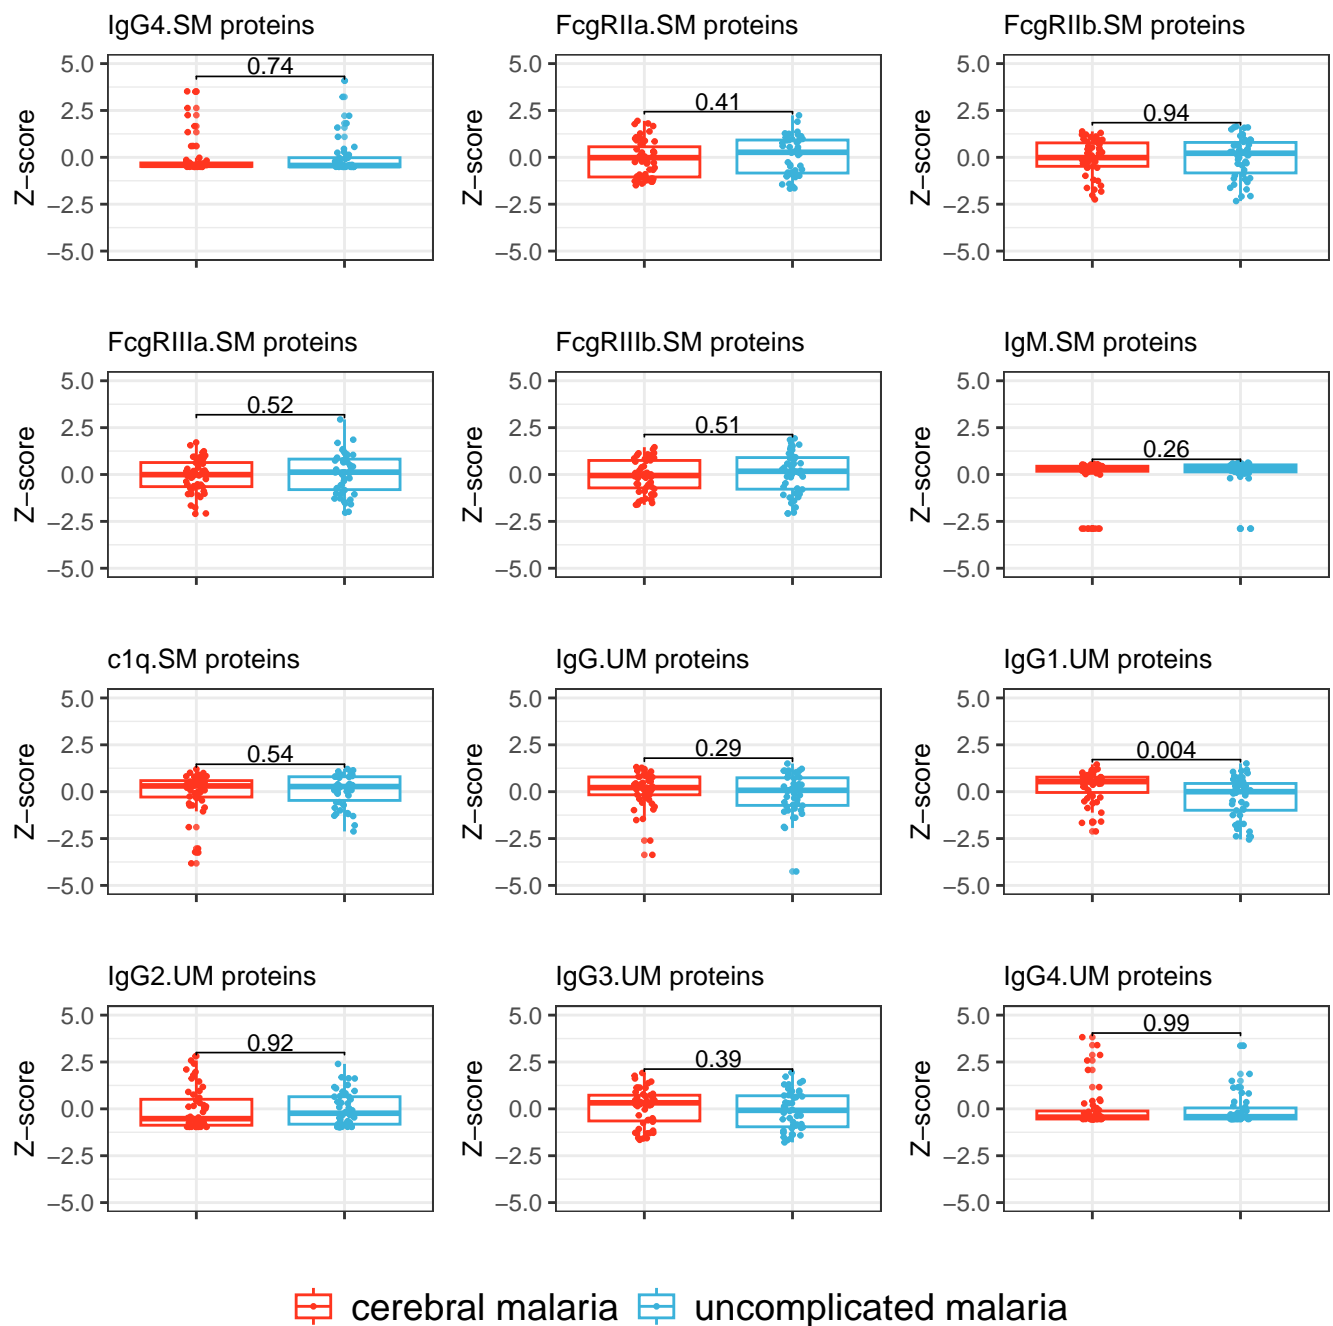

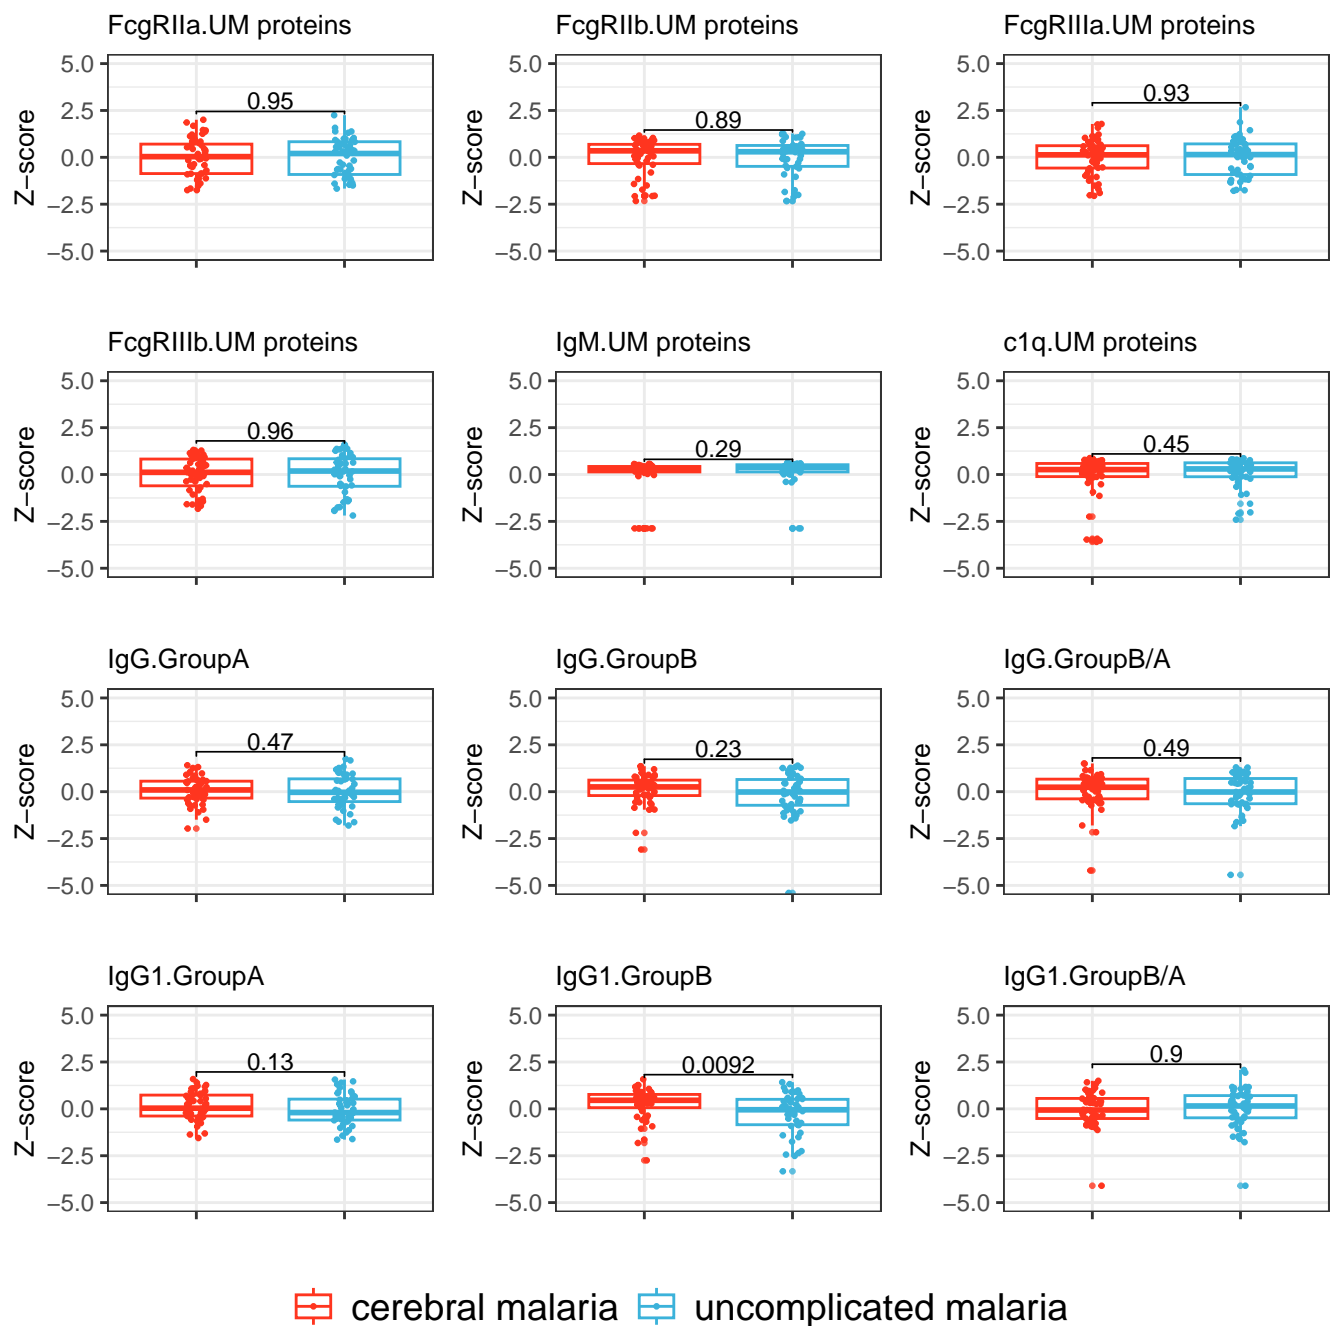

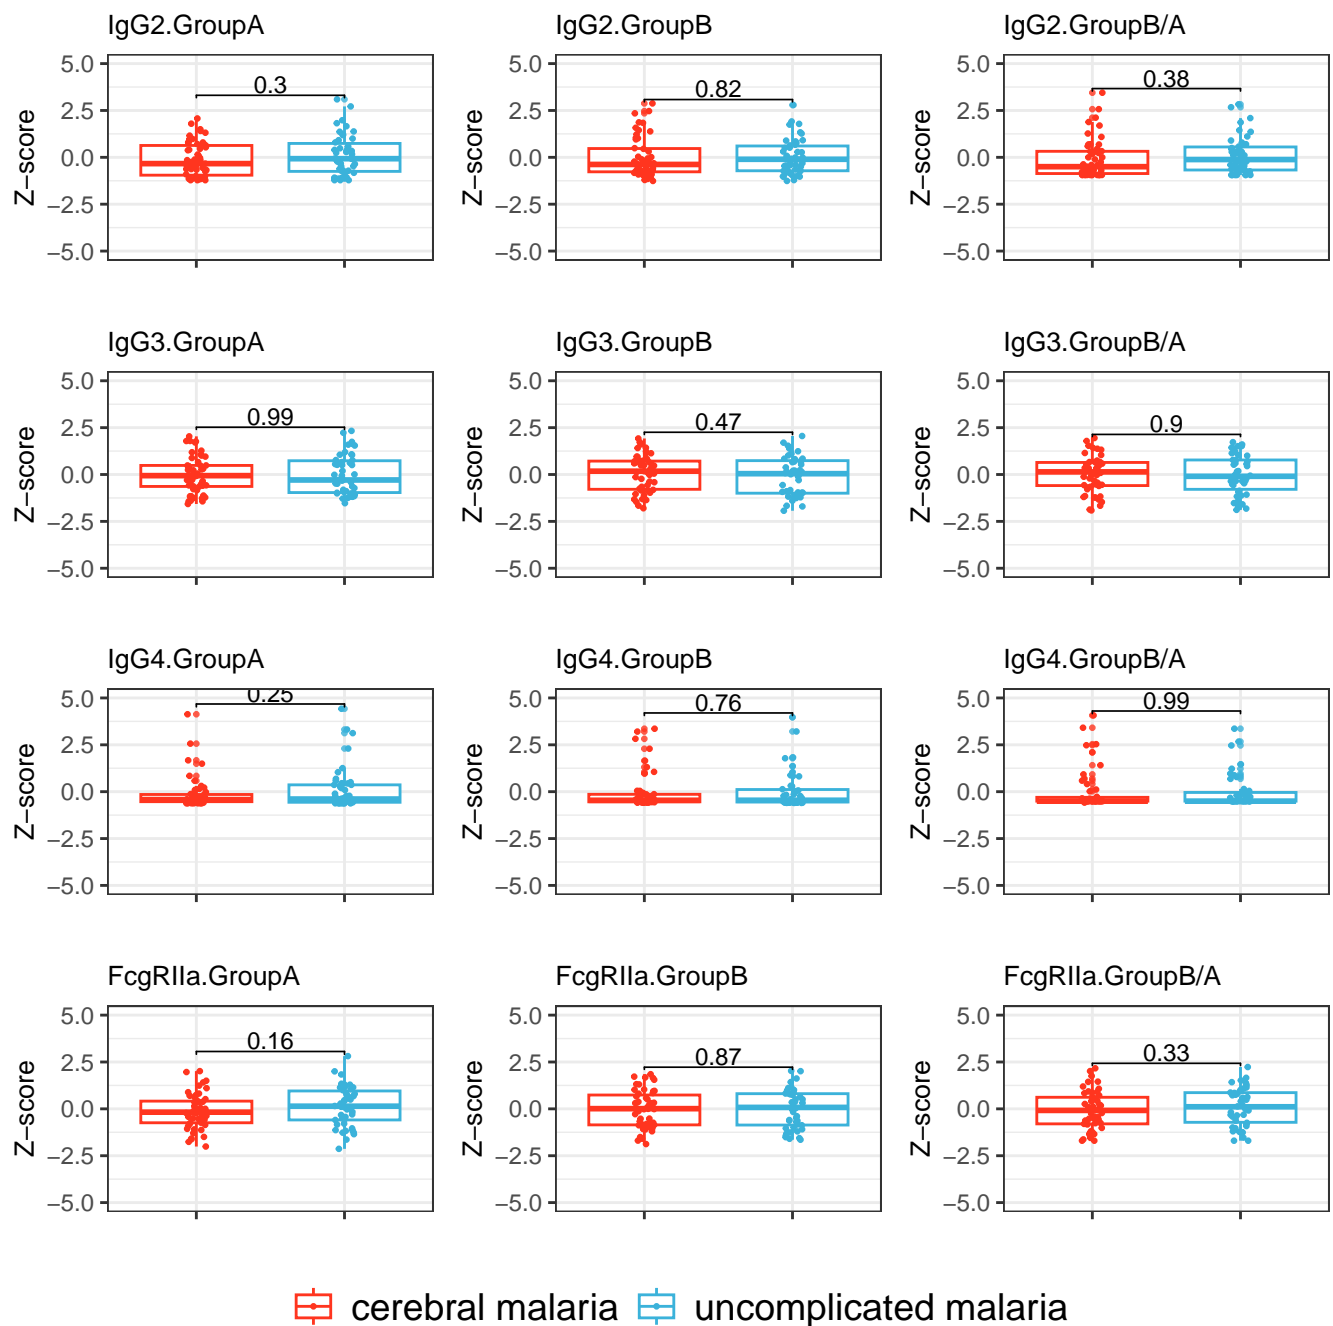

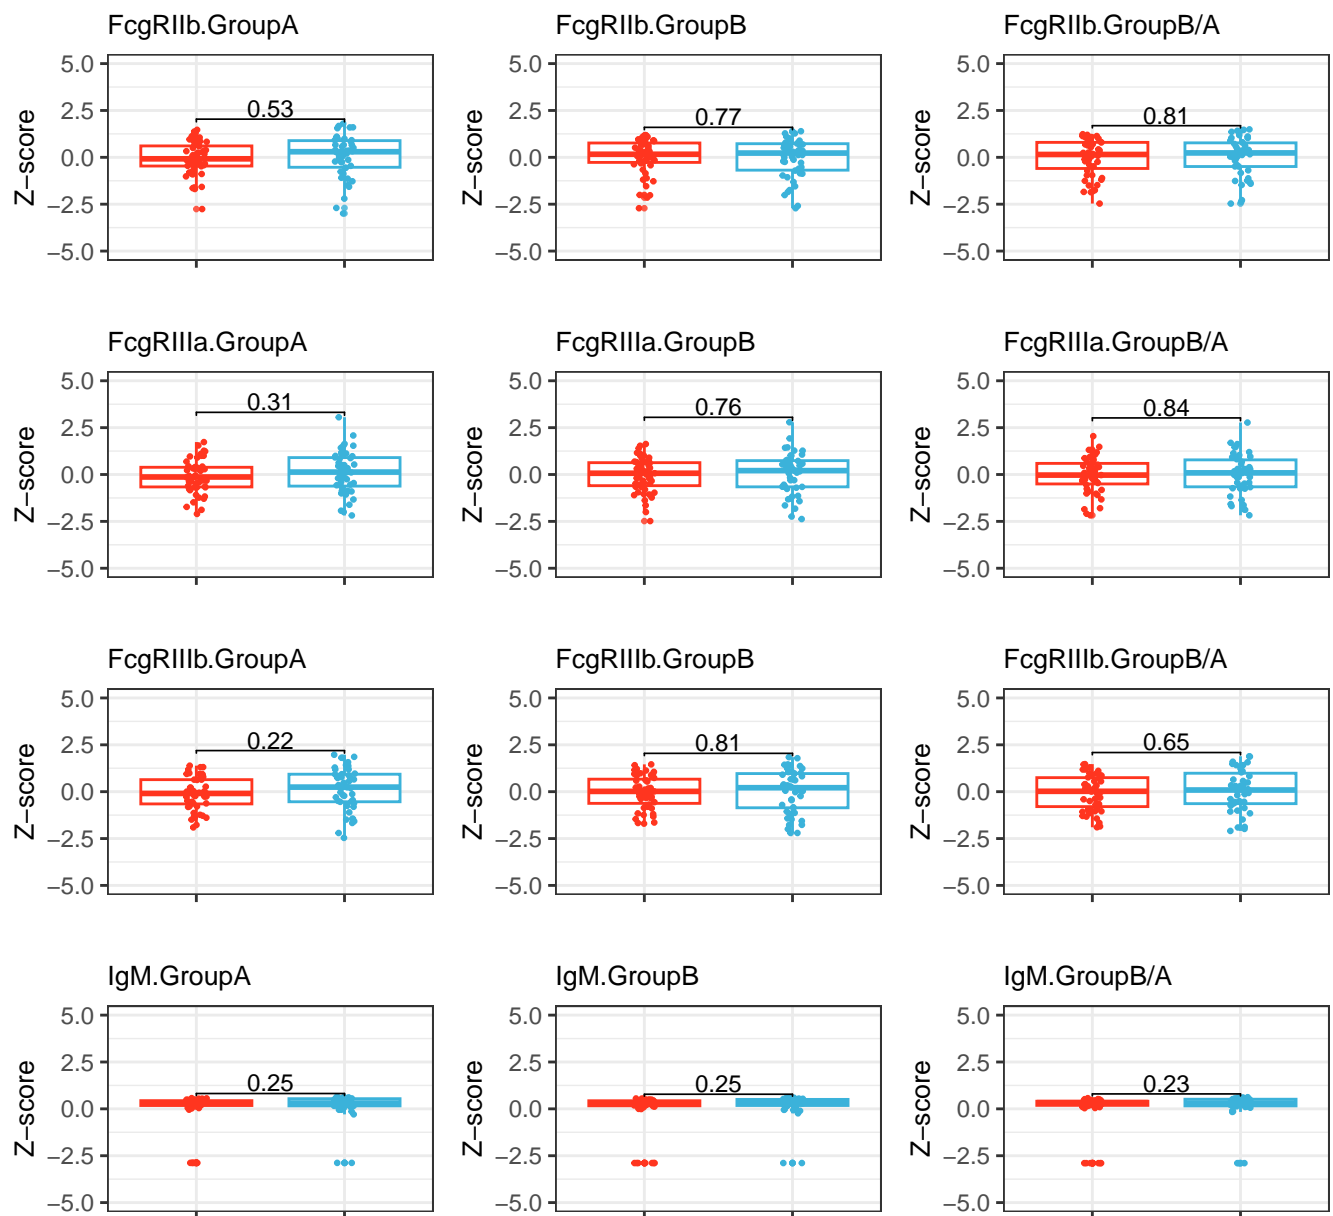

☐ cerebral malaria ☐ uncomplicated malaria



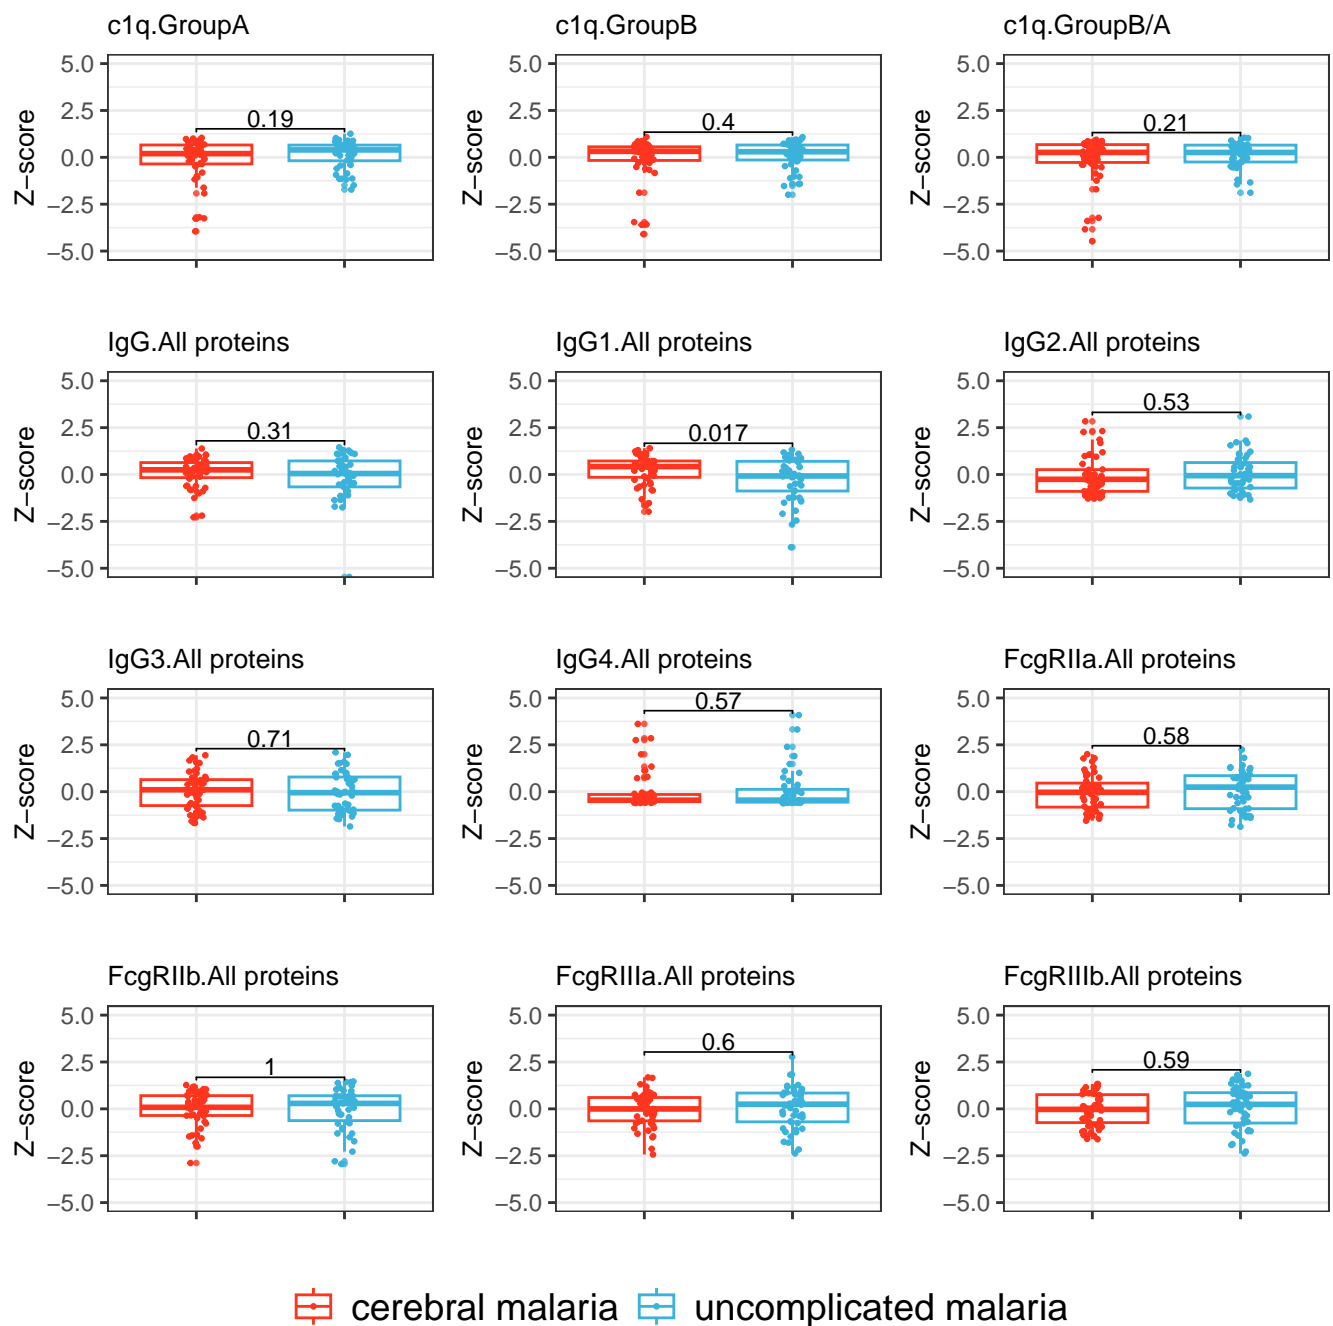

IgM.All proteins

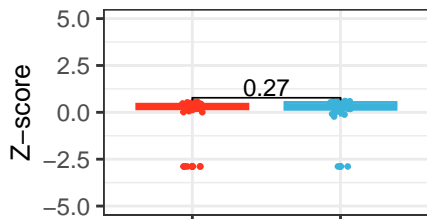

c1q.All proteins

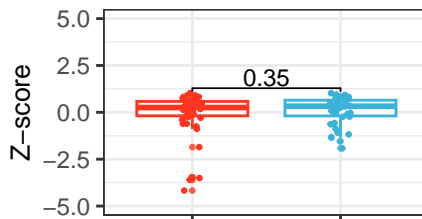

 cerebral malaria  uncomplicated malaria
