# Supplementary material for: A systems serology approach to identifying key antibody correlates of protection from cerebral malaria in Malawian children
Source: PubMed Central journal article supplement (PMC11396342; doi:10.1186/s12916-024-03604-8), 2024-09-12
Supplement: 12916_2024_3604_MOESM3_ESM.pdf [file 12916_2024_3604_MOESM3_ESM.pdf]

IgG.KOB63129\_DBLb3

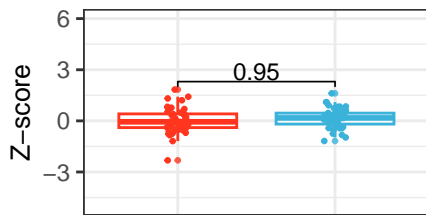

IgG.AMA1\_3D7

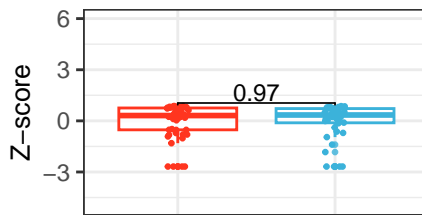

IgG.UM8\_DBLg9

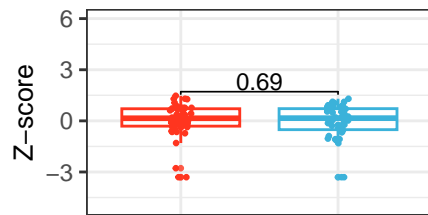

IgG.SM18\_CIDRa11

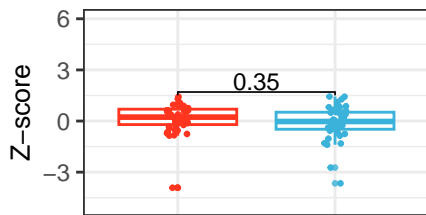

IgG.SM2\_CIDRb1

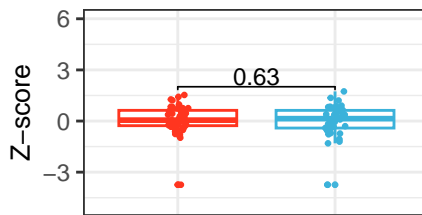

IgG.SM28\_CIDRa26DBL

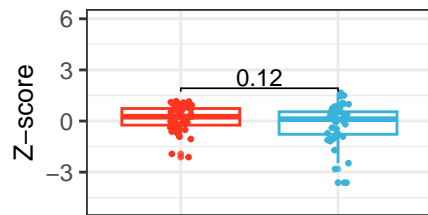

IgG.SM4\_DBLb3

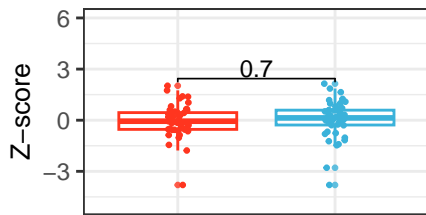

IgG.UM19\_DBLd1

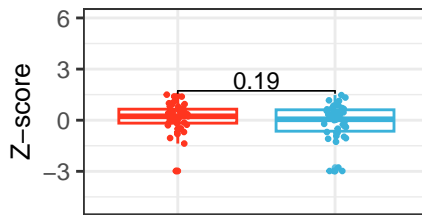

IgG.UMM20\_CIDRa31

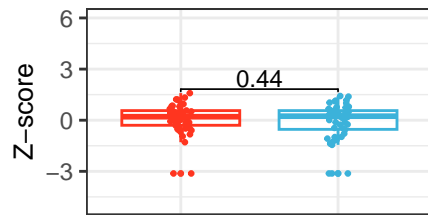

IgG.UM21\_DBLa09

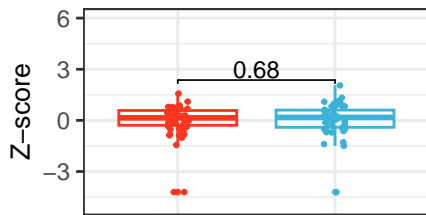

IgG.CIDRa\_DBLb3

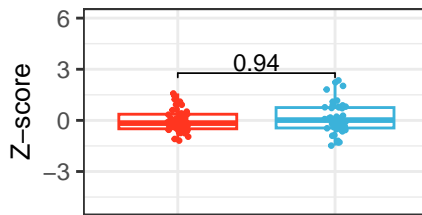

IgG.UM45\_CIDRa17

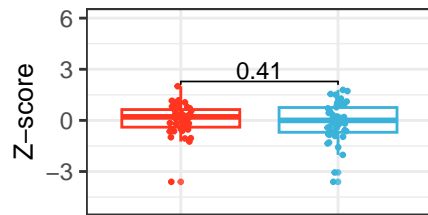

 cerebral malaria  uncomplicated malaria

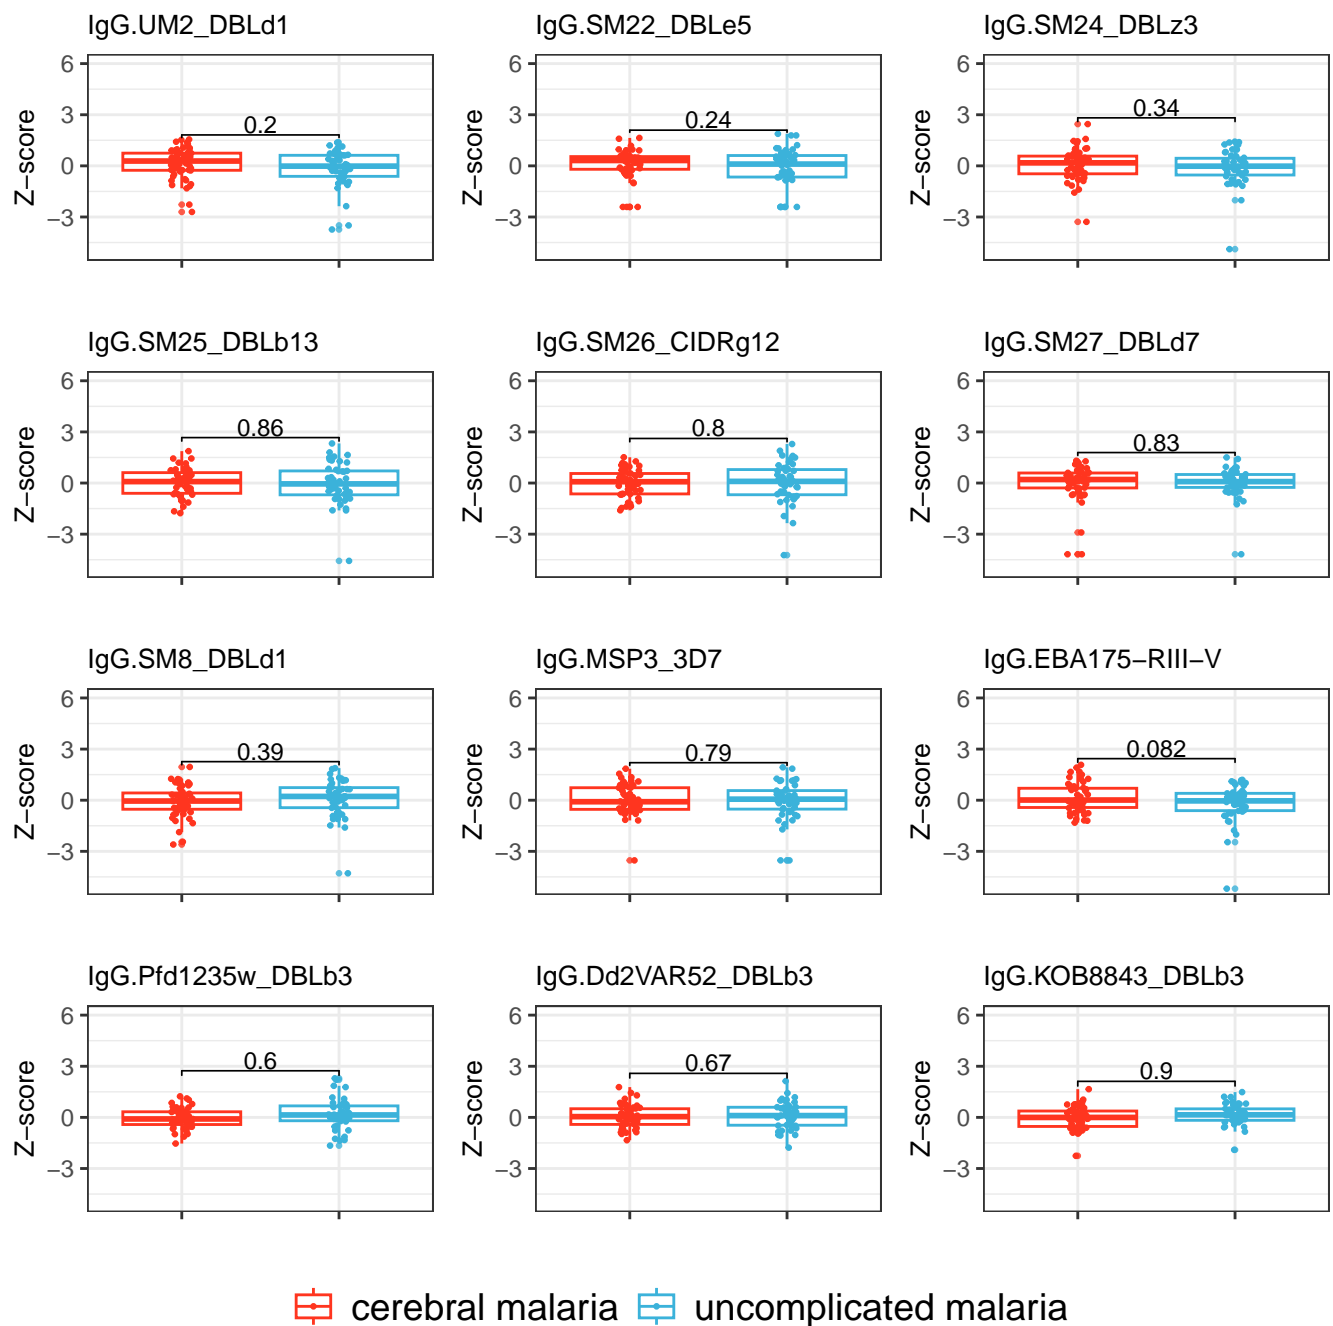

IgG.AA75496\_DBLb3

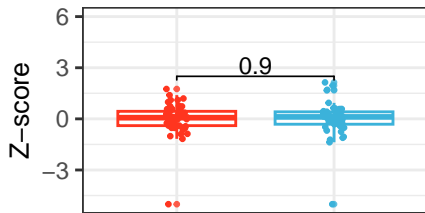

IgG.MSP2

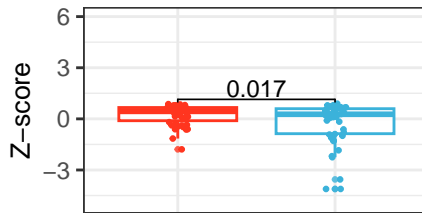

IgG.AMA1-3D7

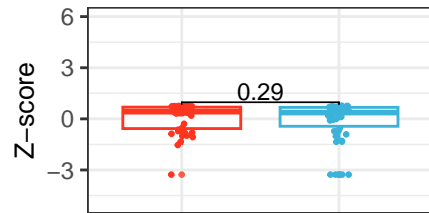

IgG.SM1\_CIDRa24

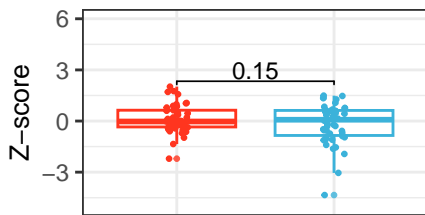

IgG.SM19\_CIDRa16

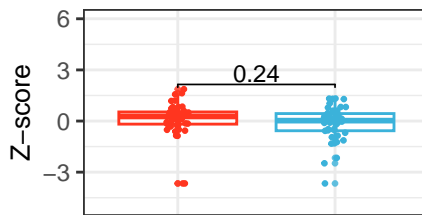

IgG.SM3\_DBLb12

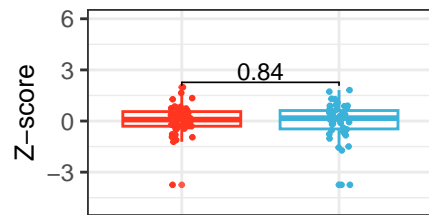

IgG.UM14\_DBLd1

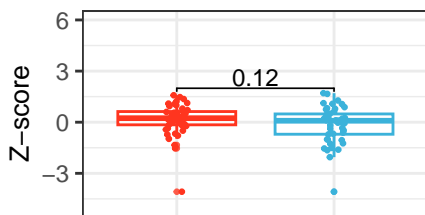

IgG.SM5\_DBLb3

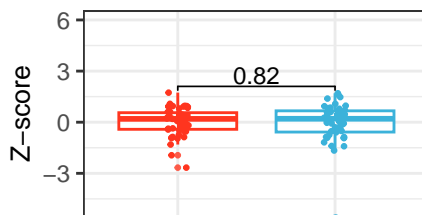

IgG.CSP-1

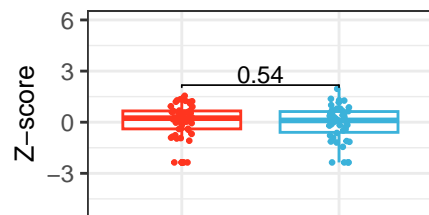

IgG.SM6\_DBLd1

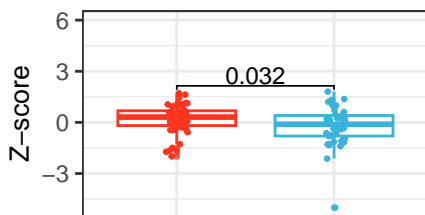

IgG.SM11\_DBLe3

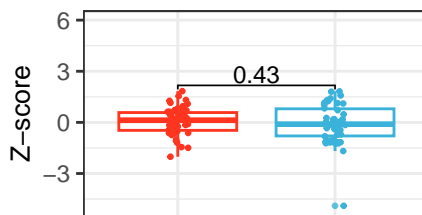

IgG.SM9\_DBLd1

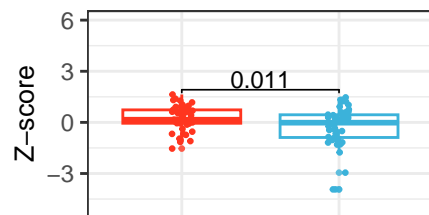

 cerebral malaria
  uncomplicated malaria

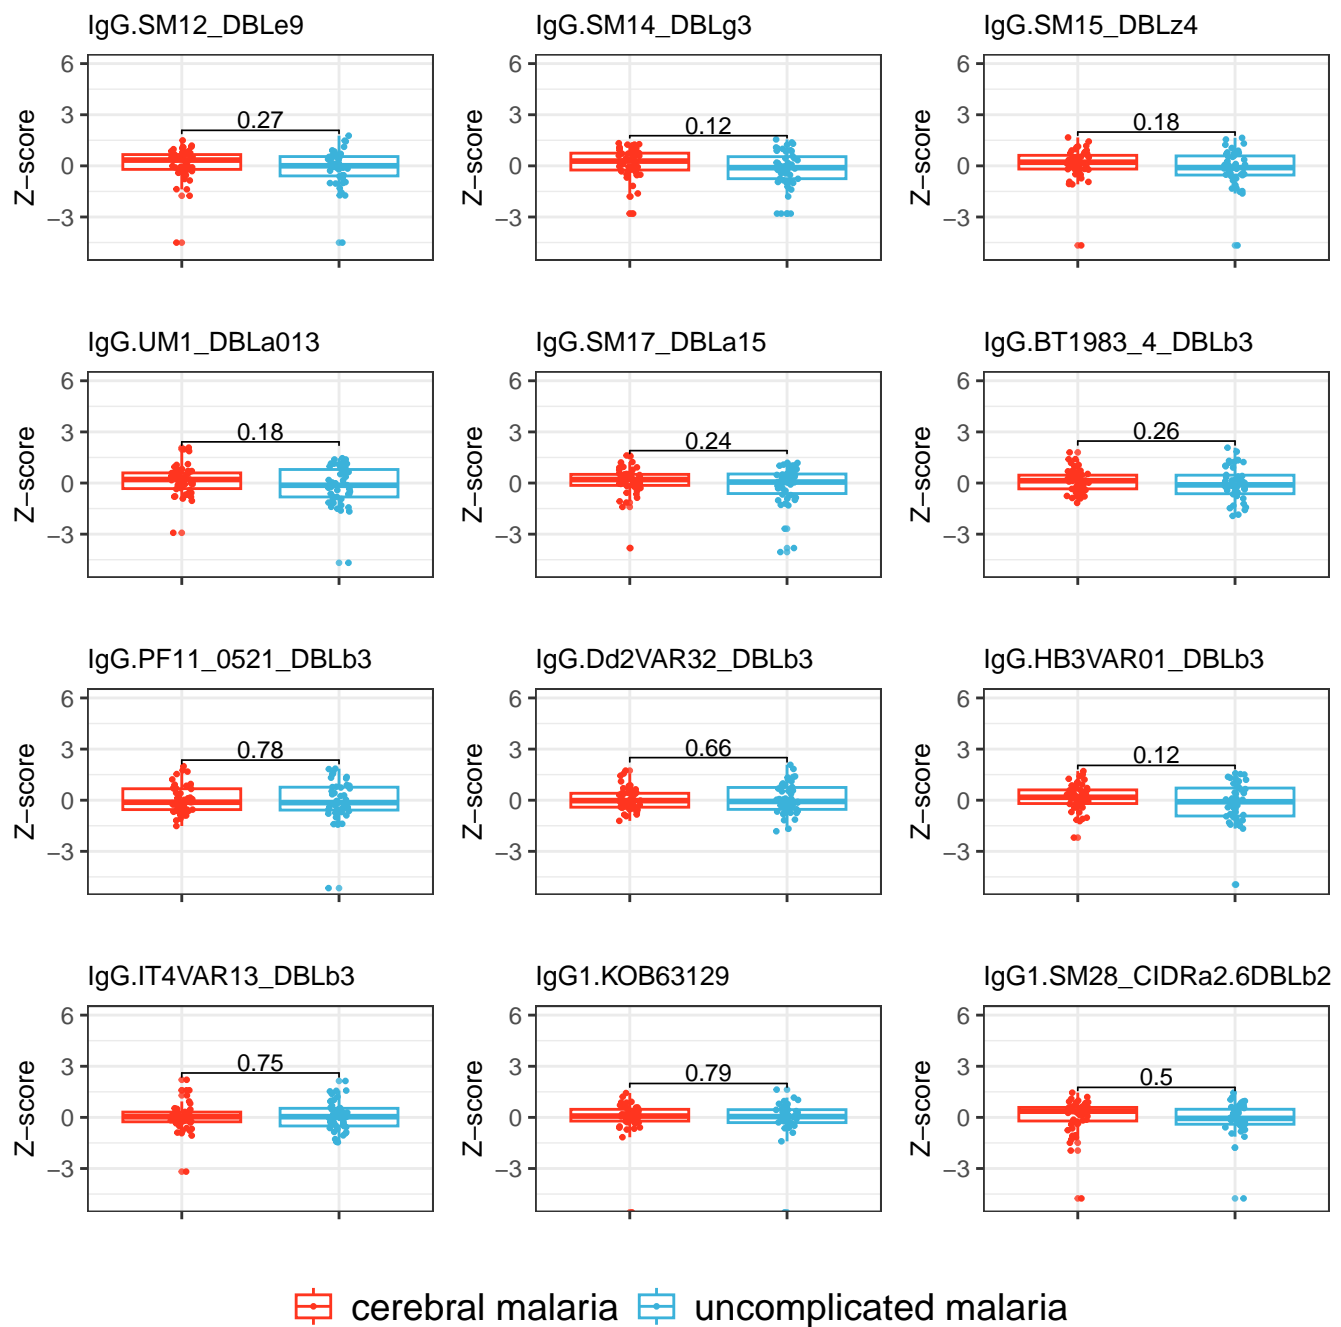

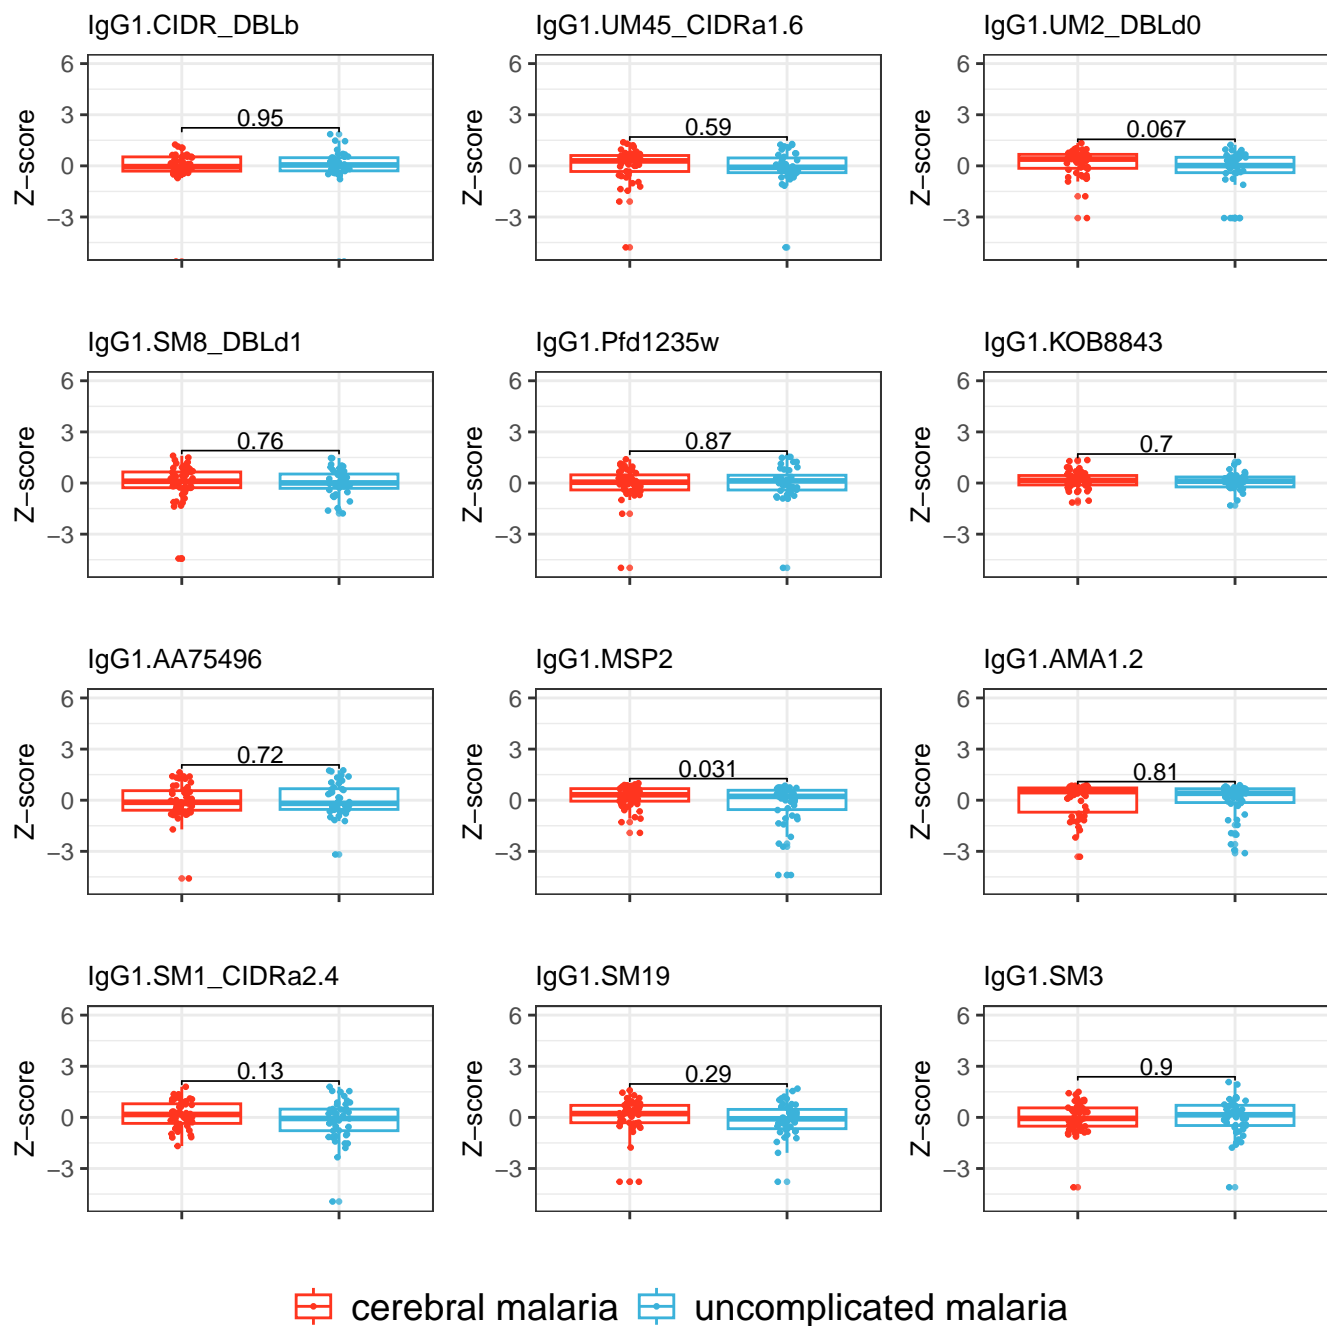

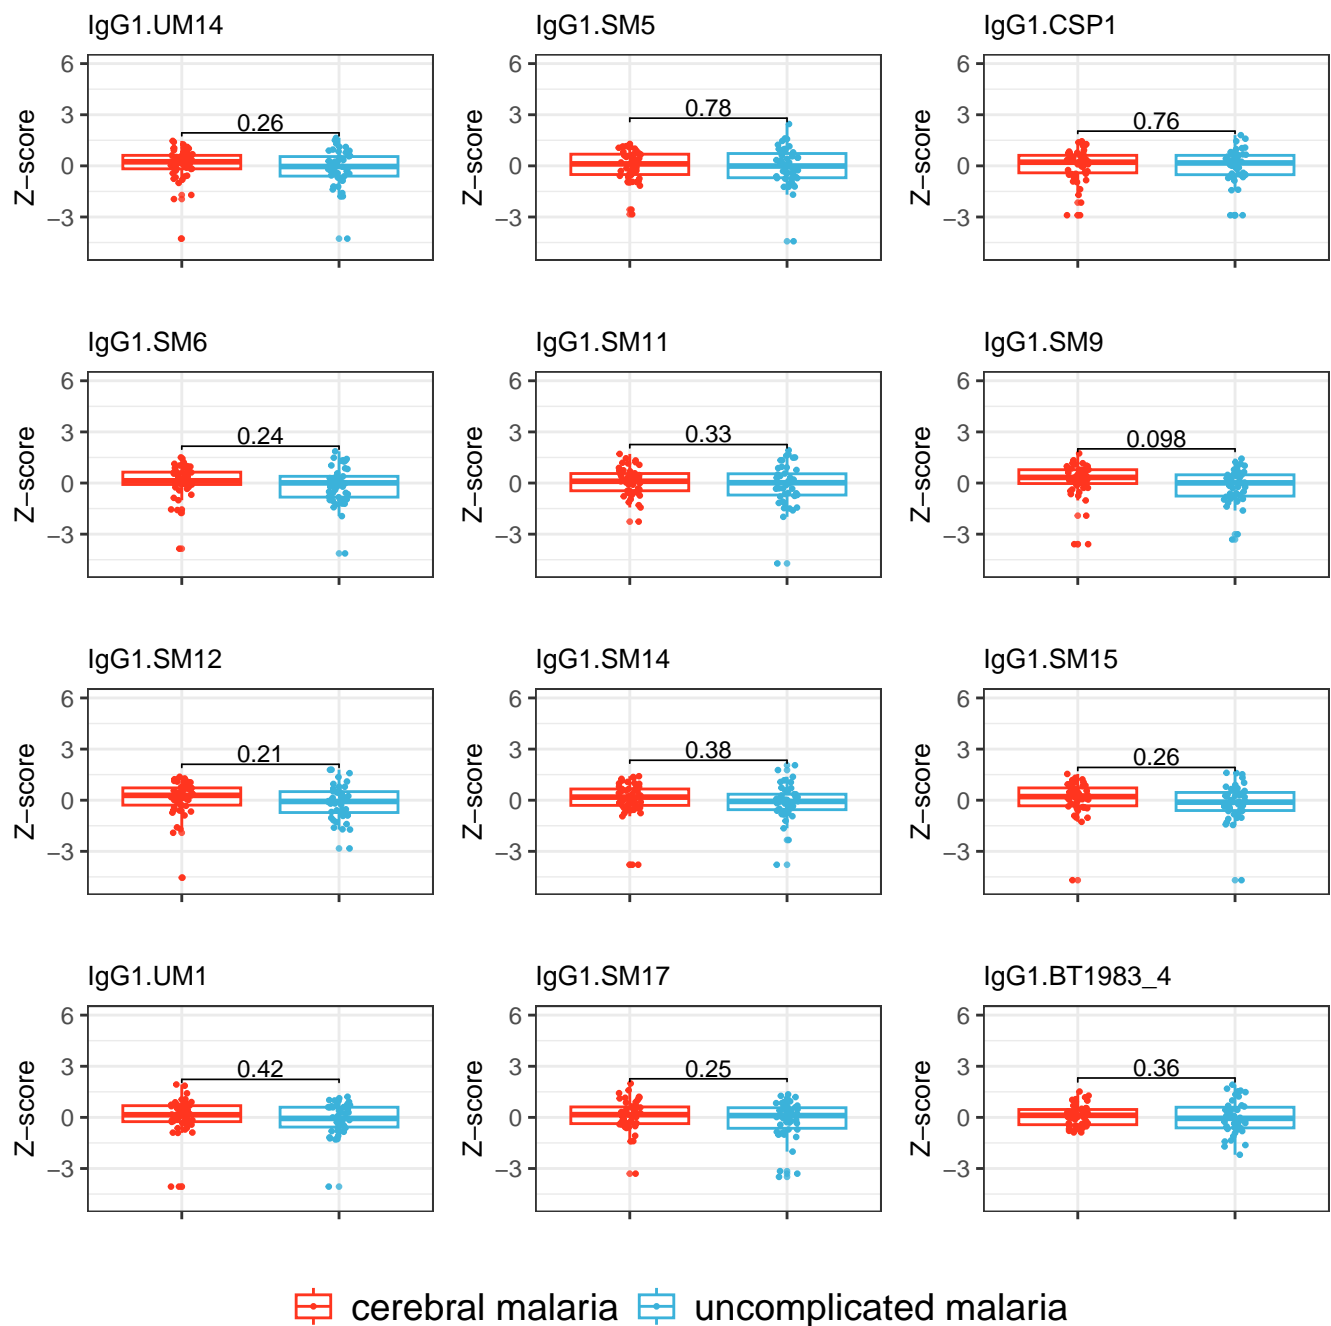

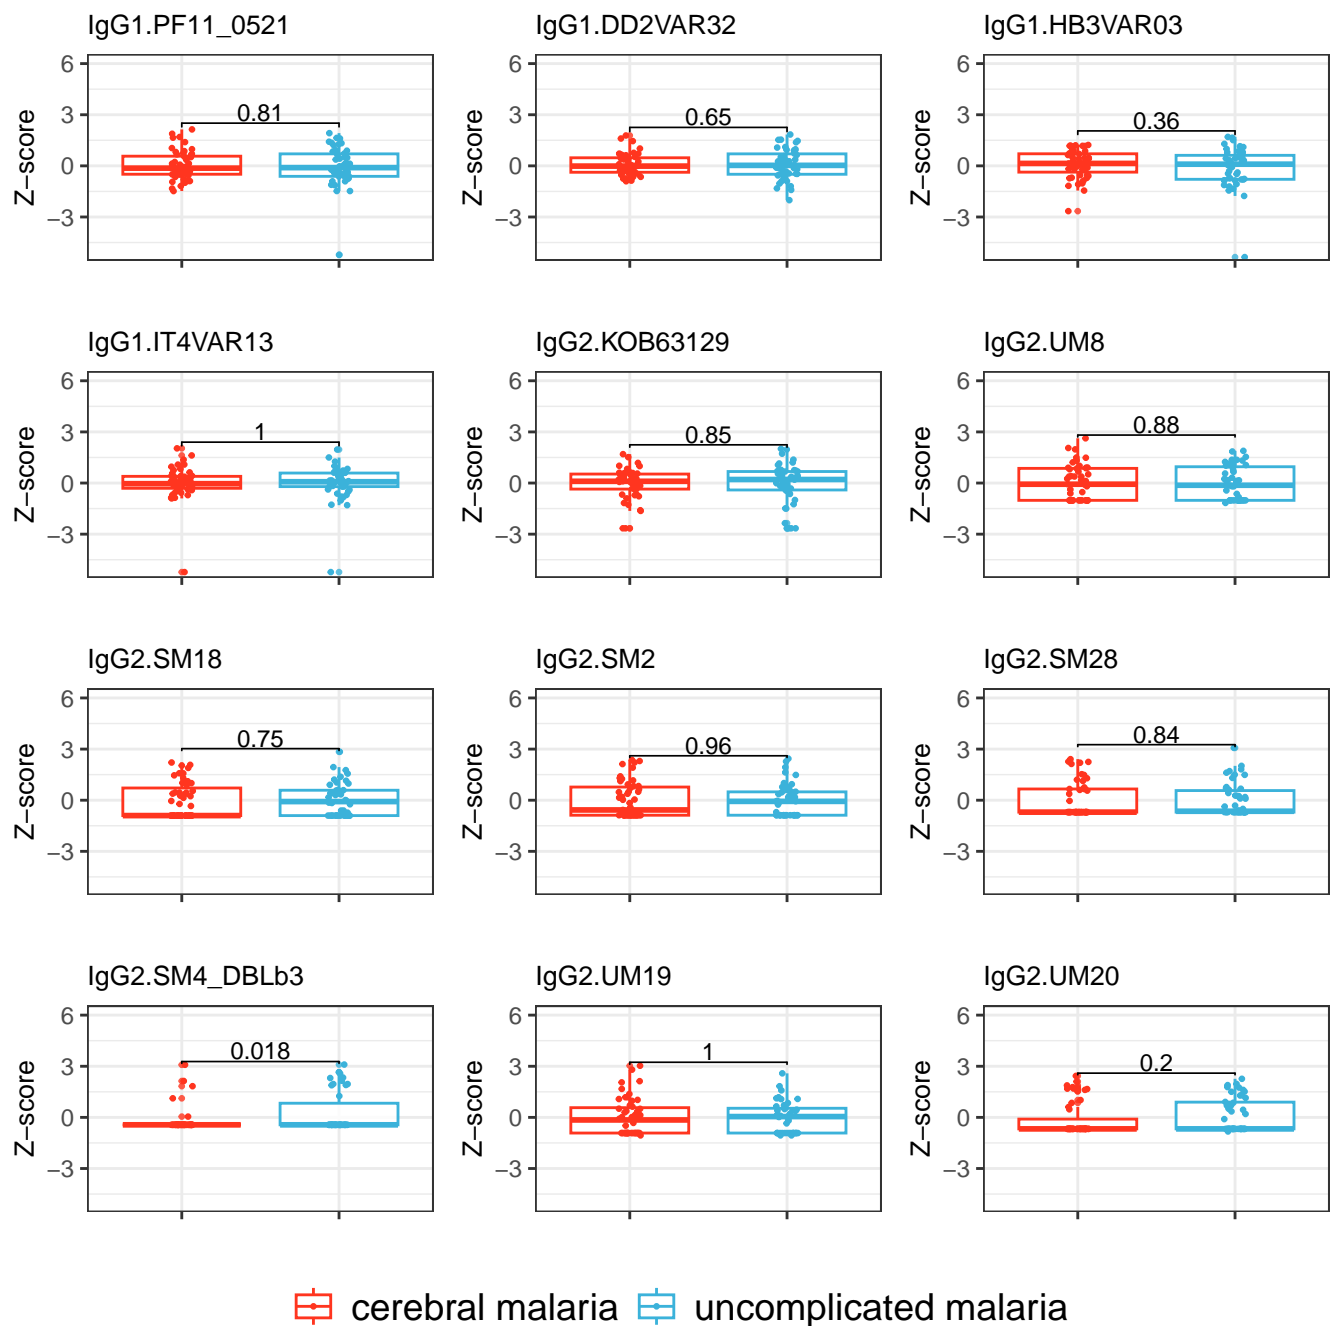

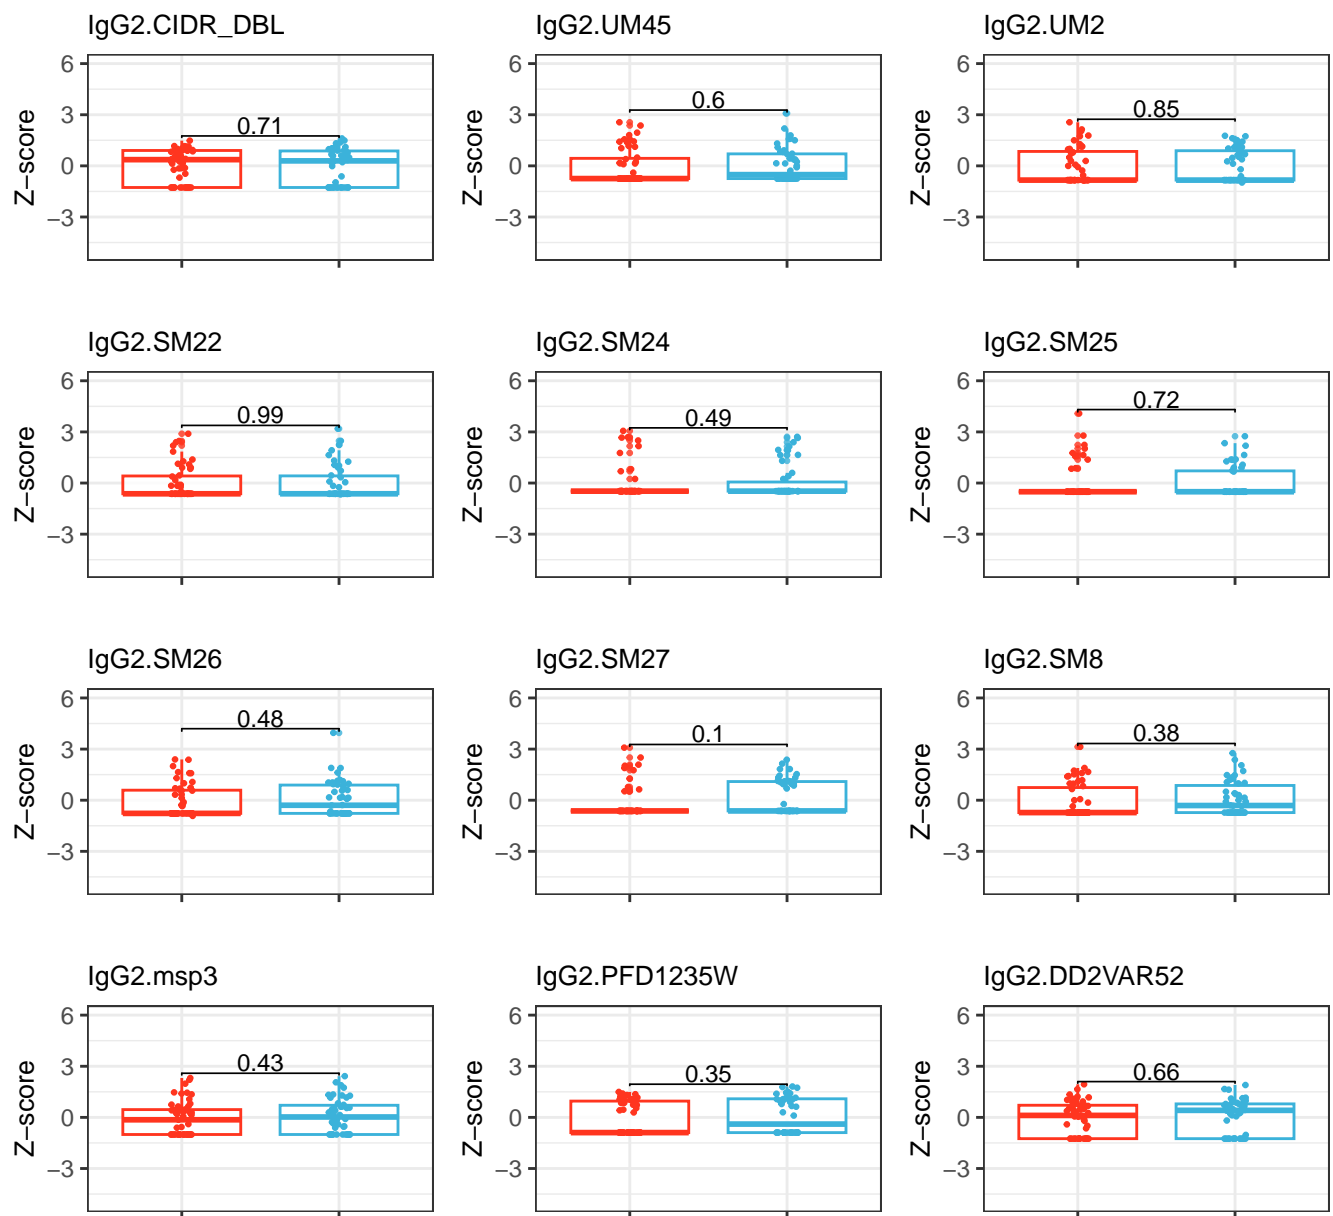

 cerebral malaria  uncomplicated malaria



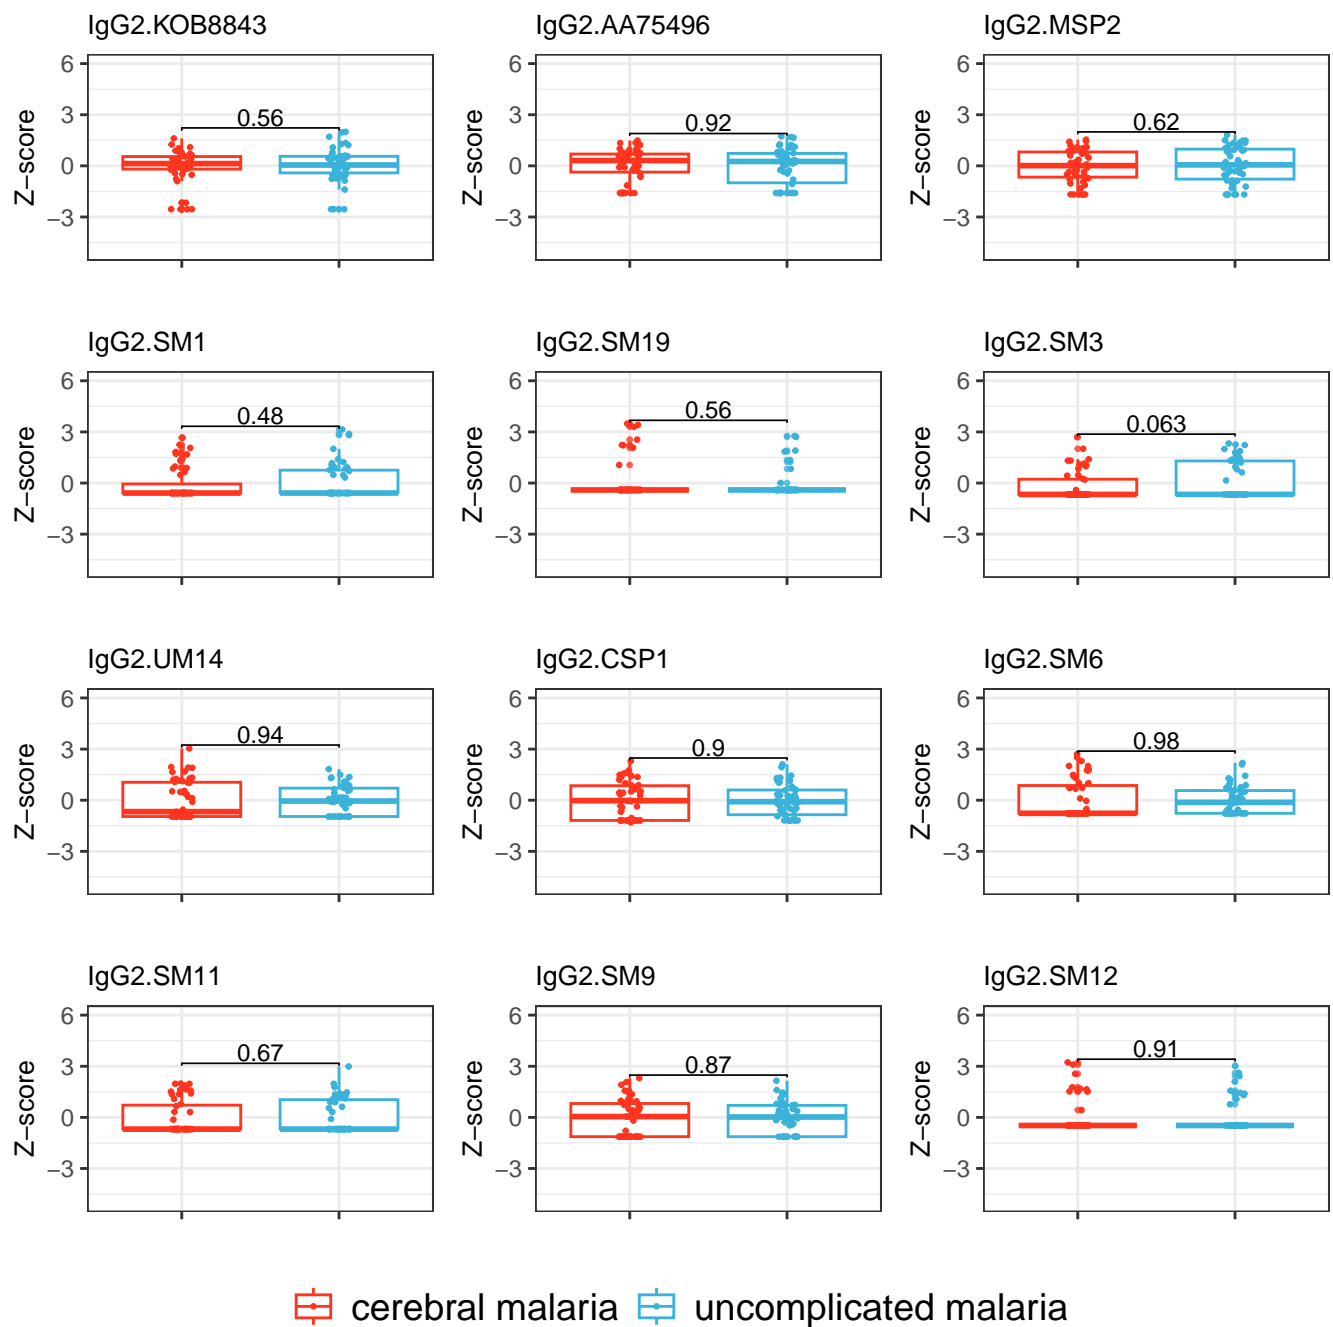

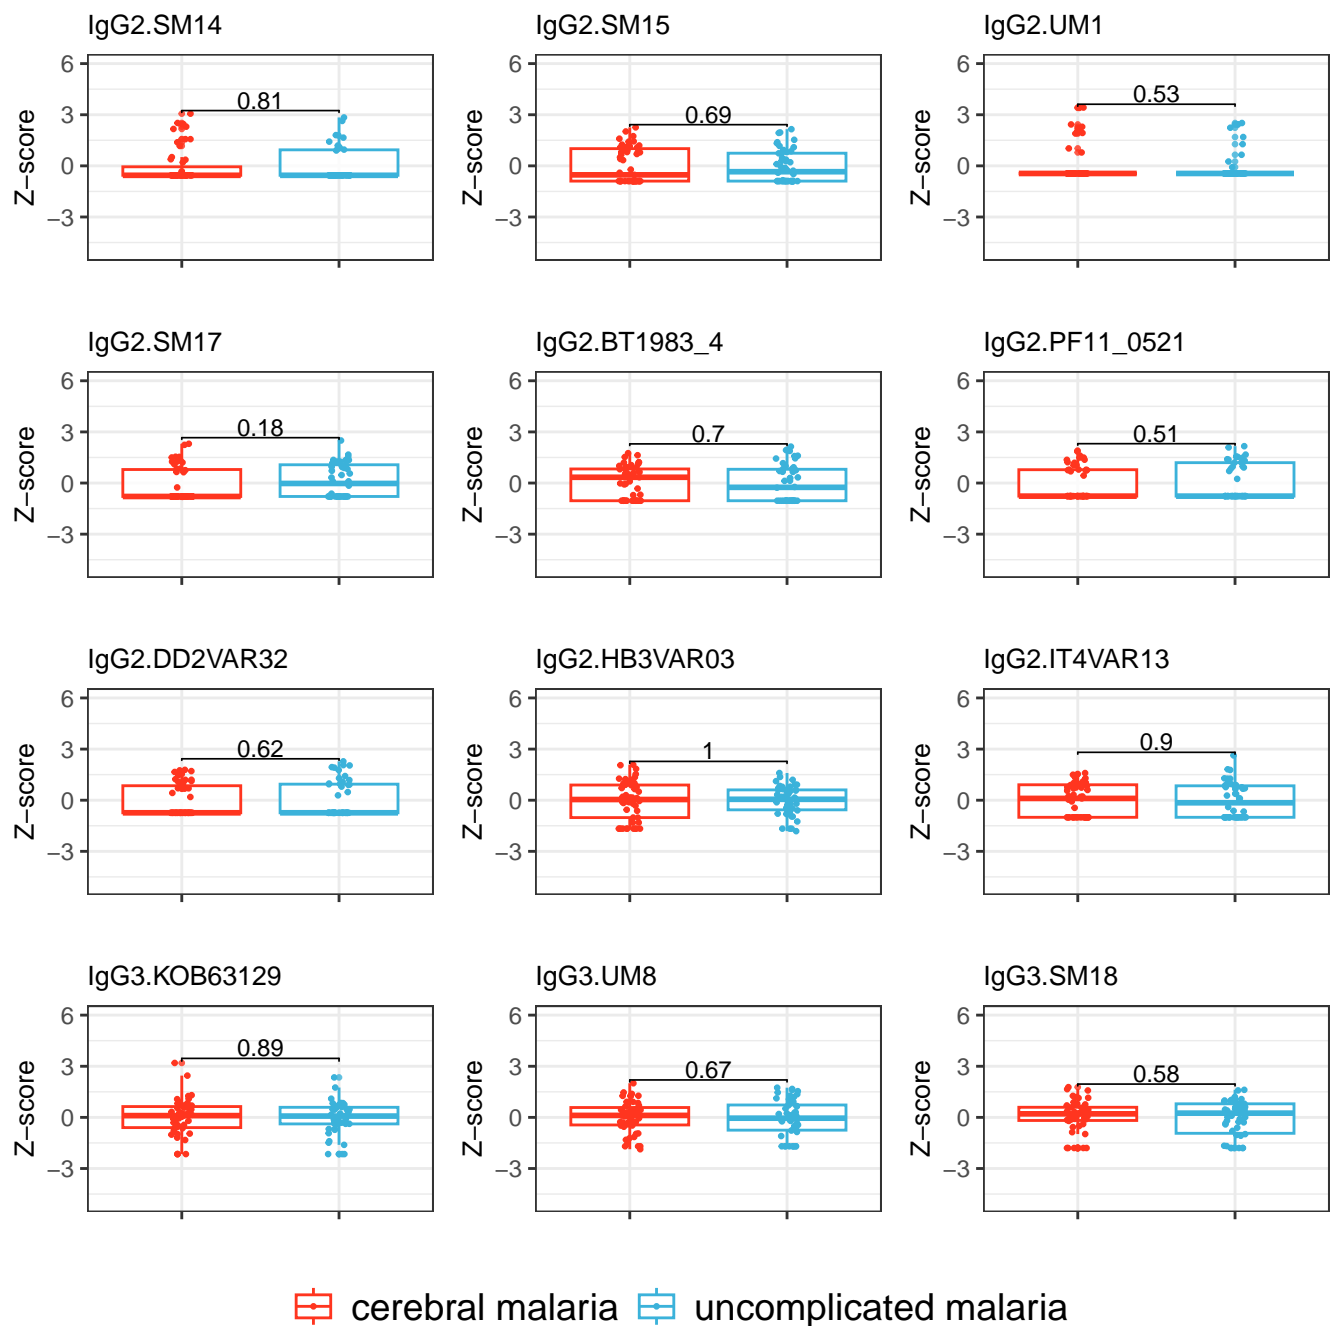

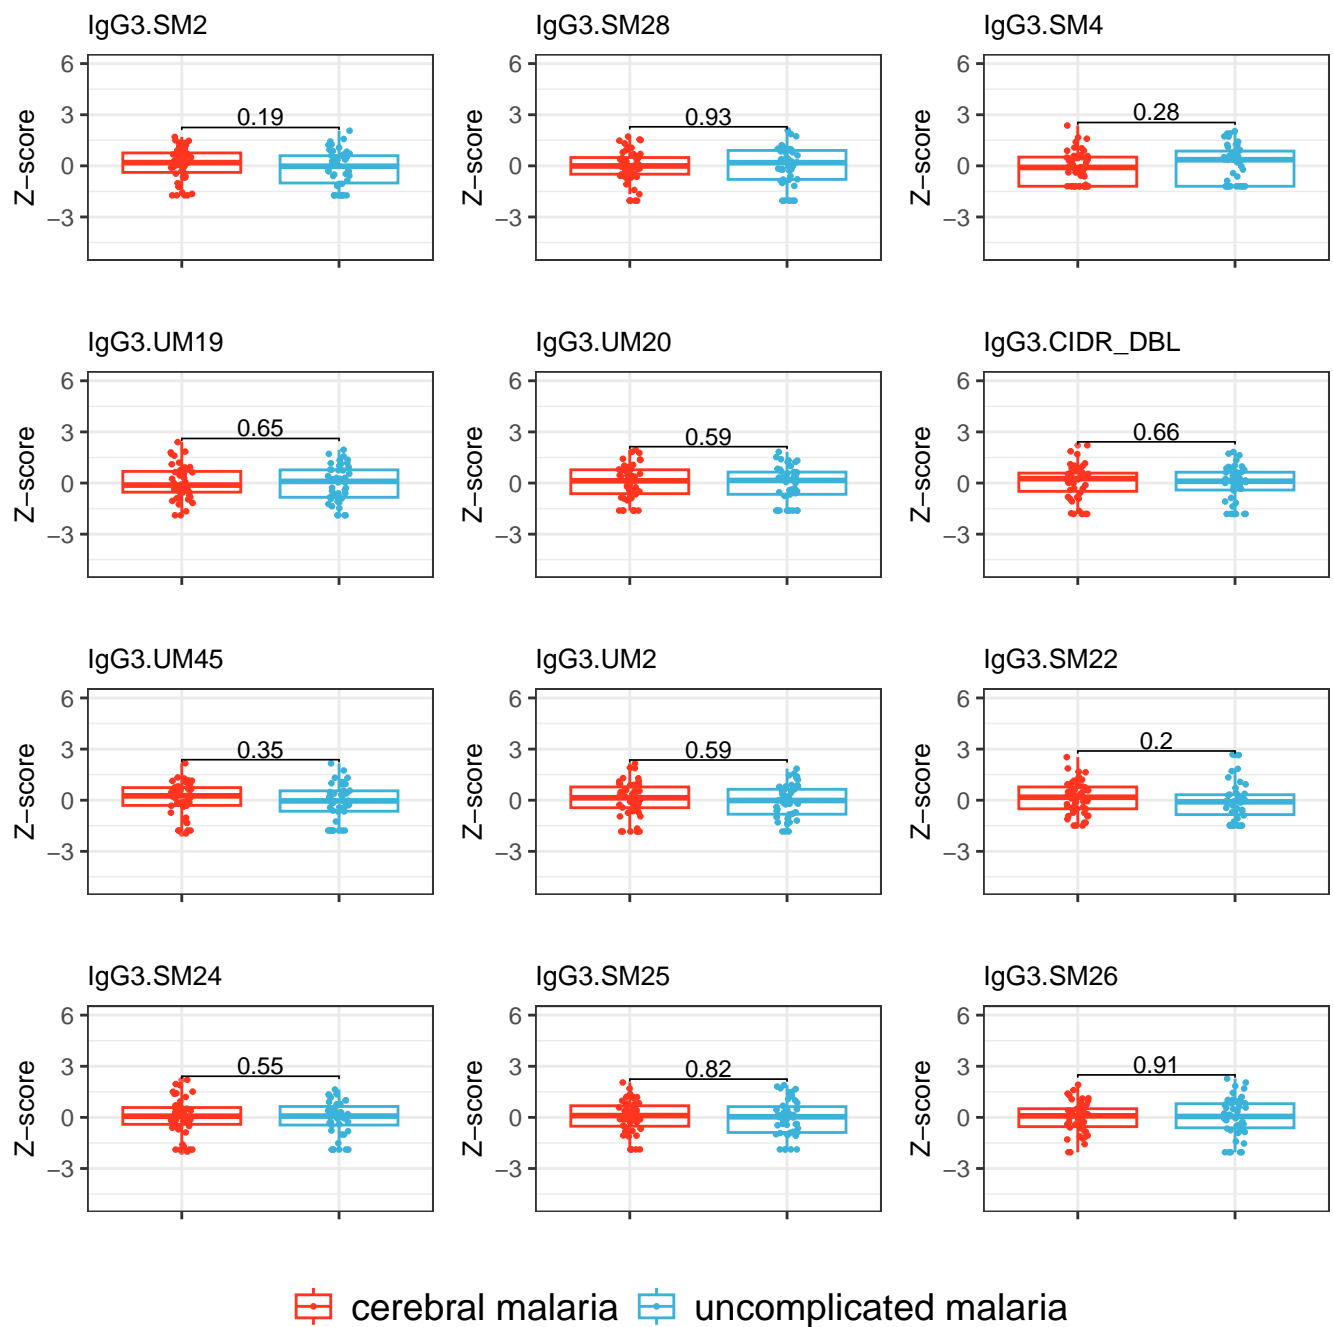

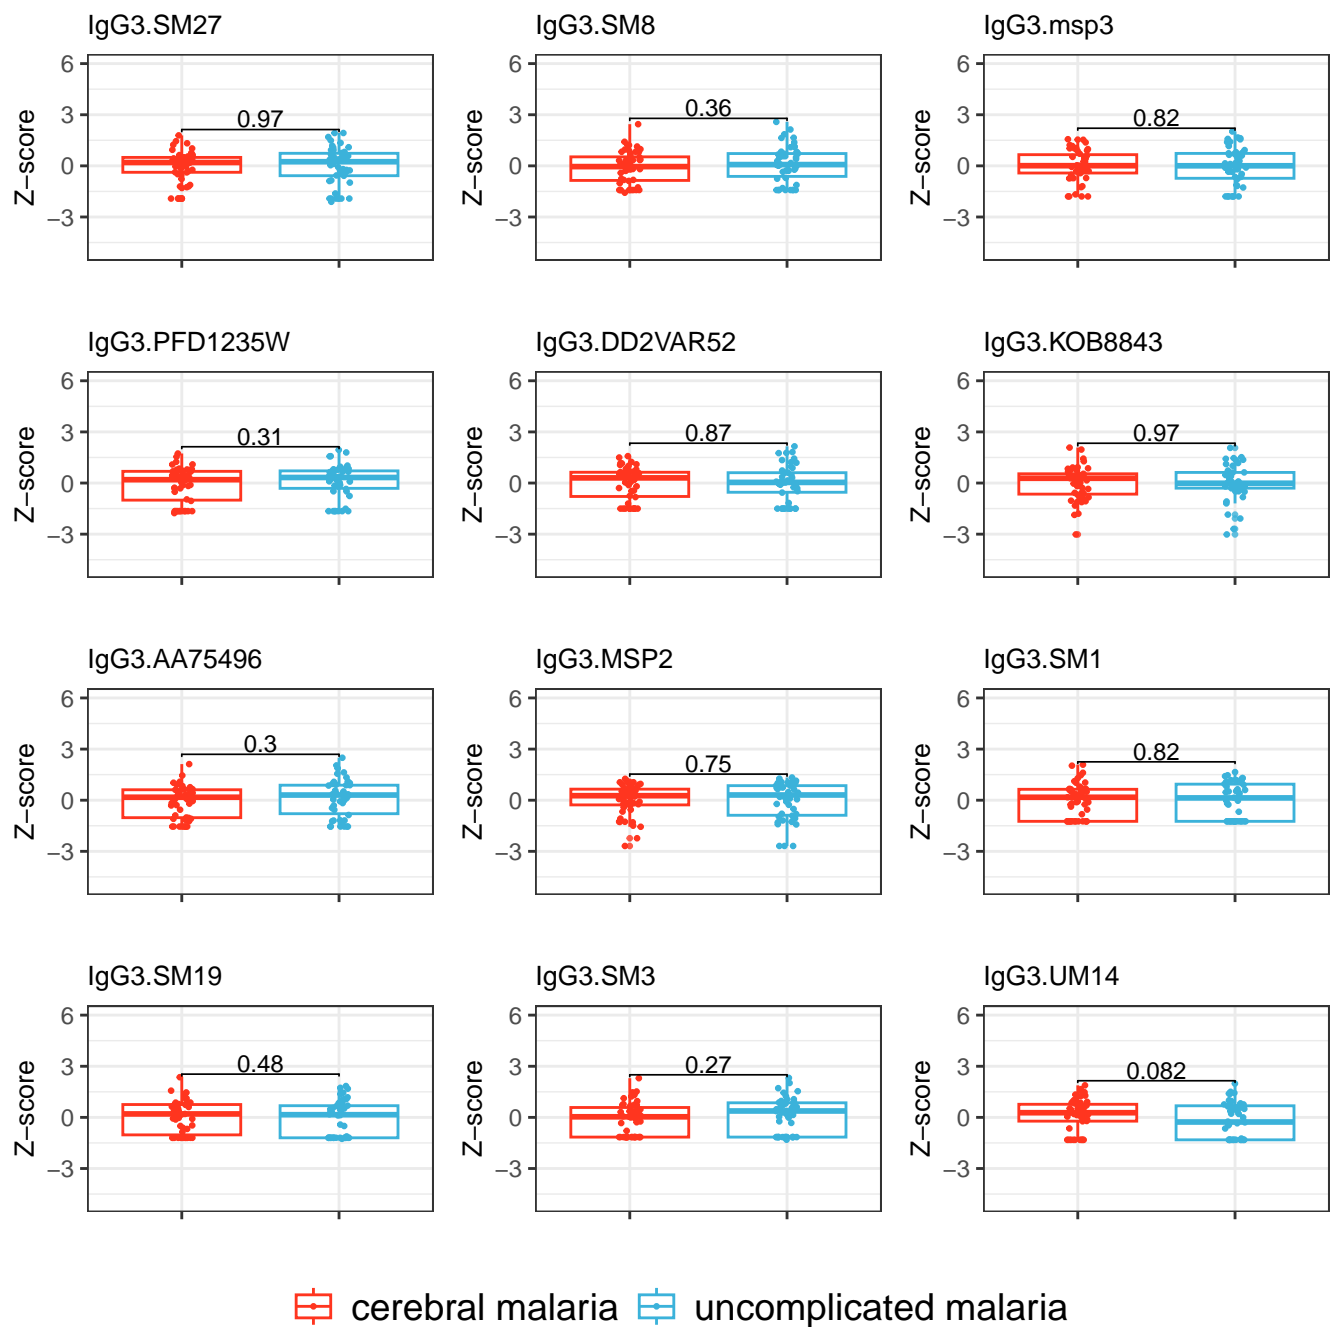

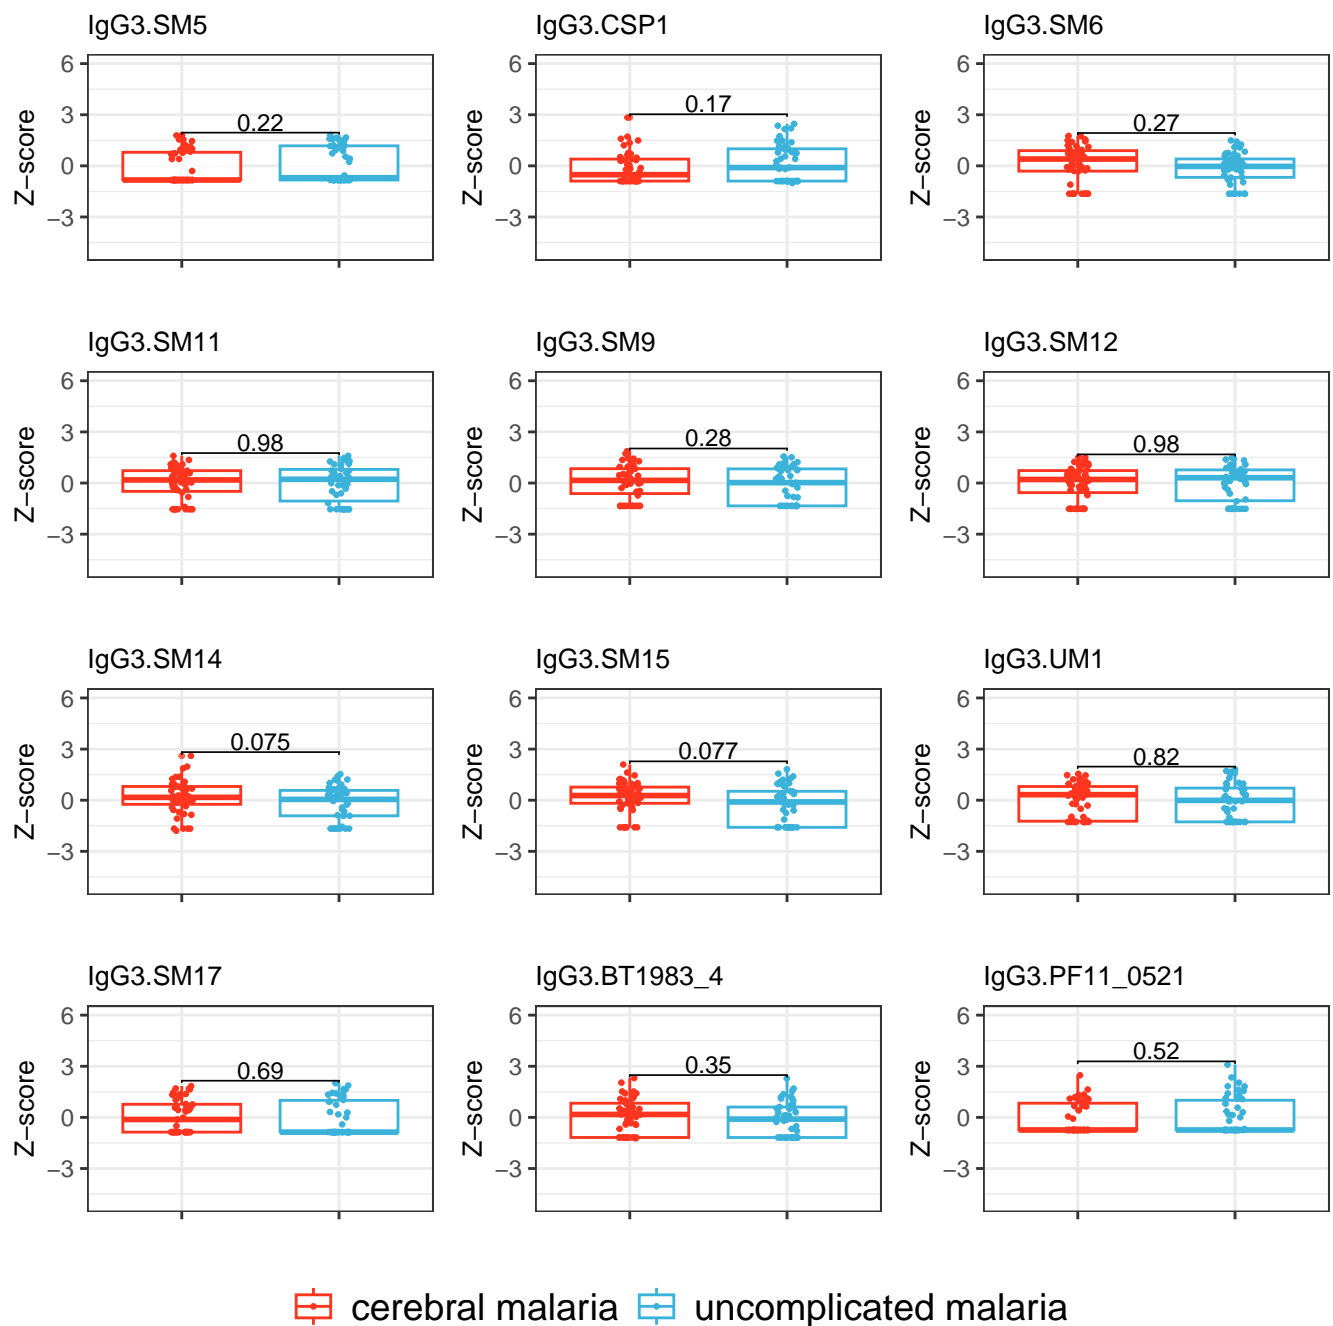

IgG3.DD2VAR32

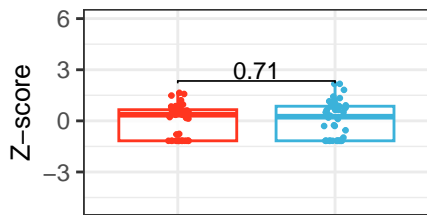

IgG3.HB3VAR03

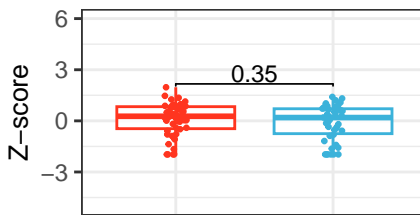

IgG3.IT4VAR13

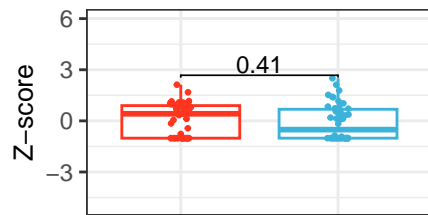

IgG4.KOB63129

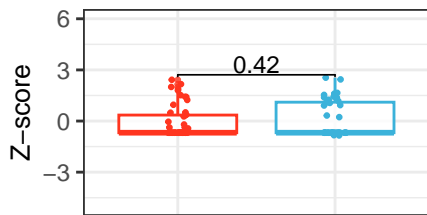

IgG4.UM8

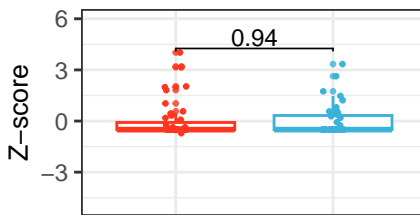

IgG4.SM18

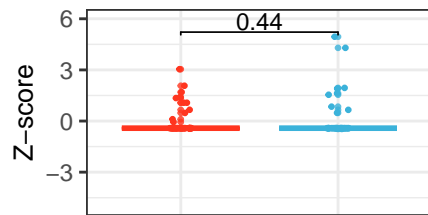

IgG4.SM2

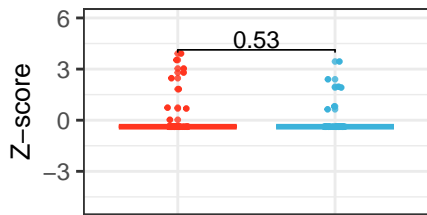

IgG4.SM28

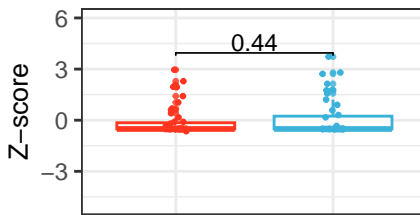

IgG4.SM4

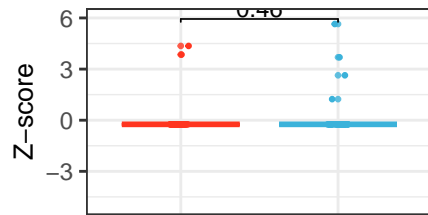

IgG4.UM19

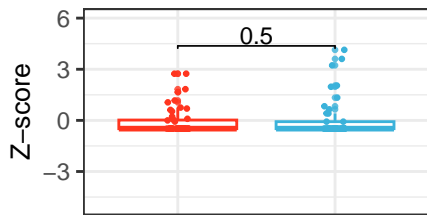

IgG4.UM20

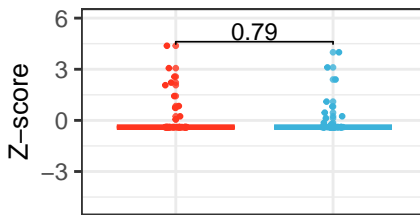

IgG4.CIDR\_DBL

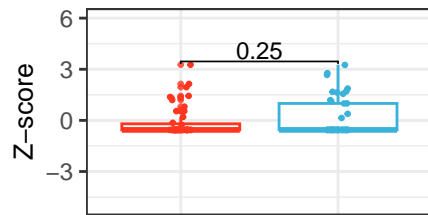

 cerebral malaria  uncomplicated malaria

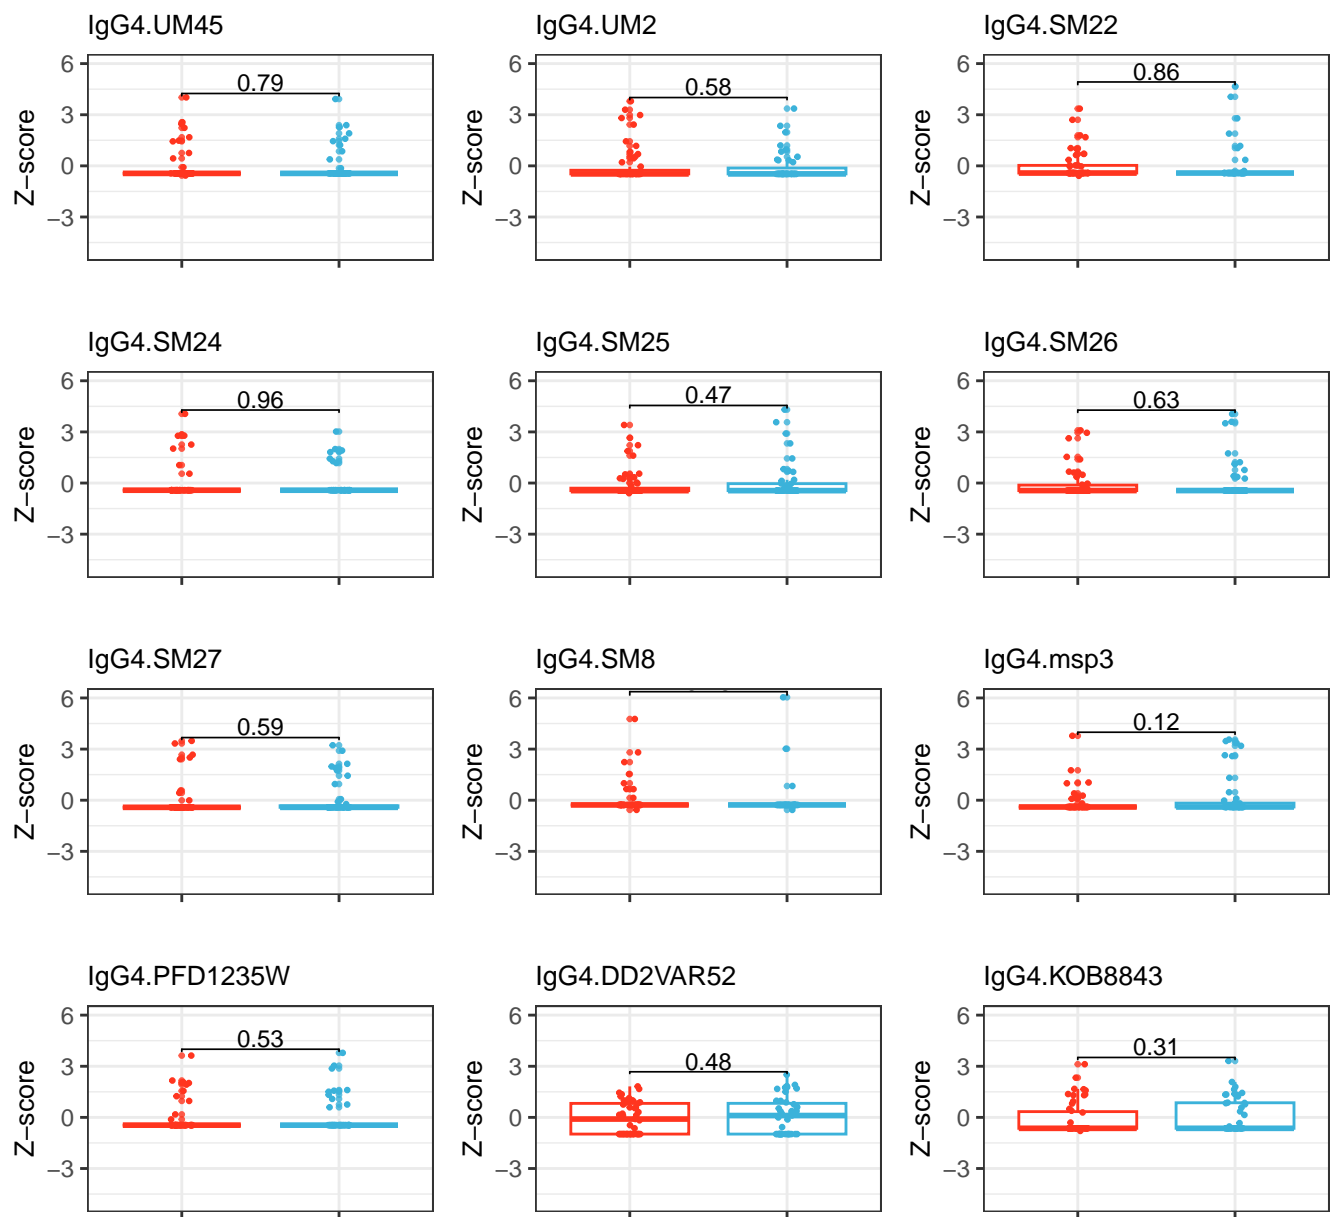

☐ cerebral malaria ☐ uncomplicated malaria

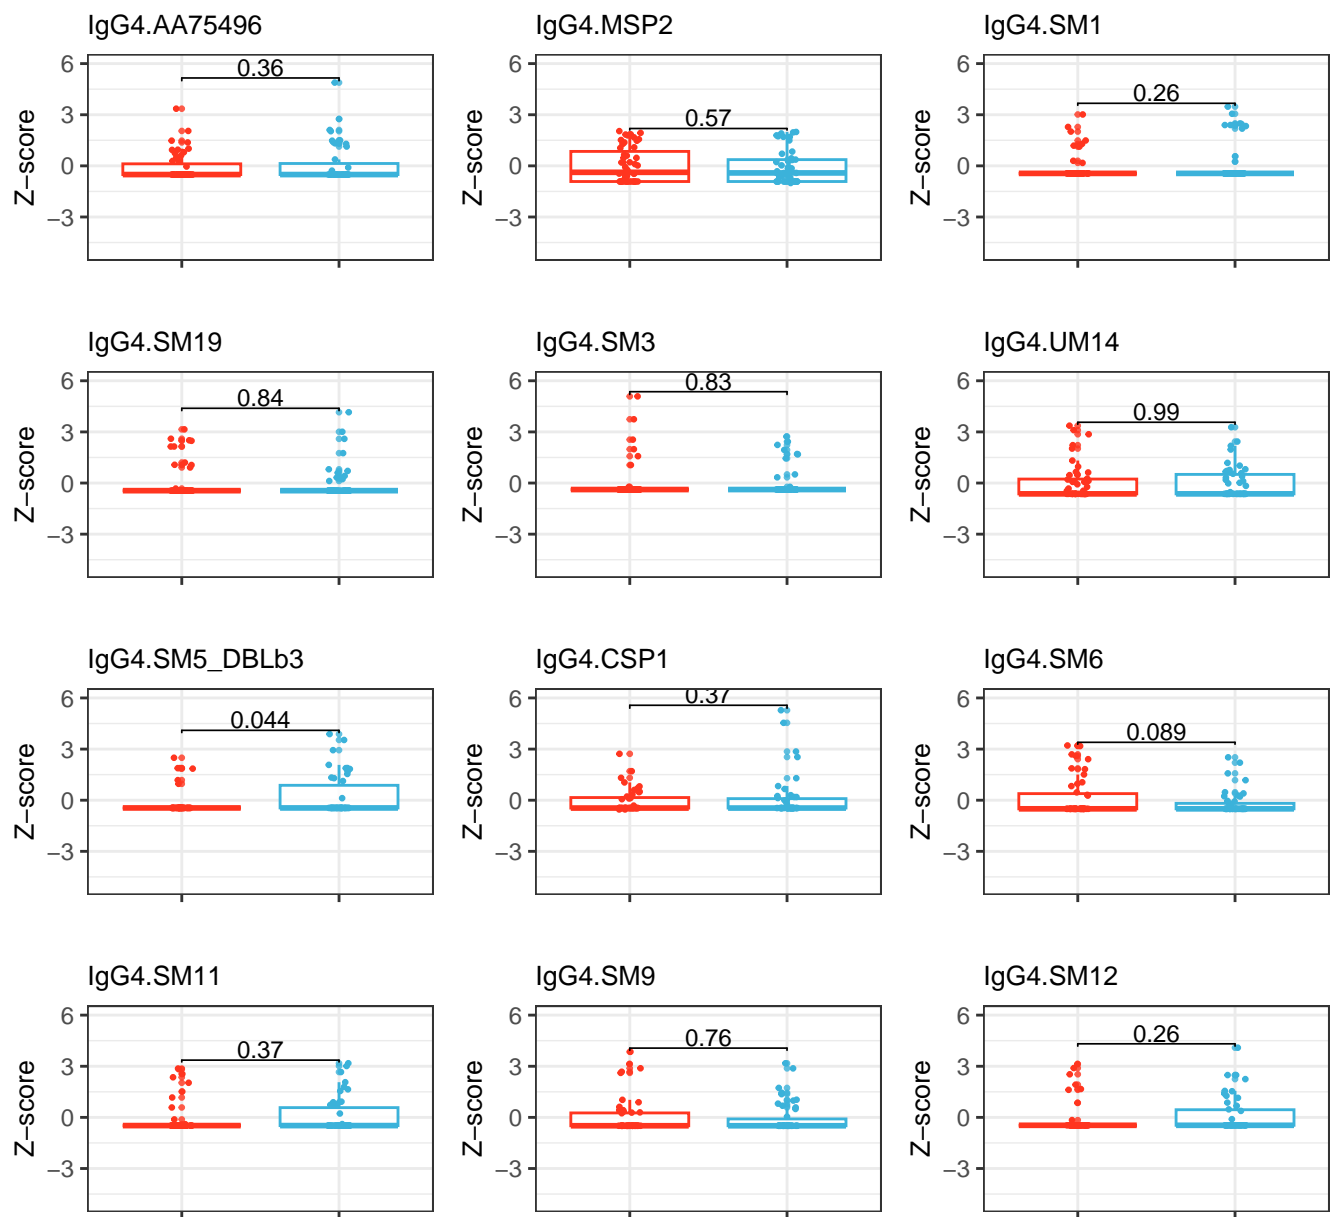

☐ cerebral malaria ☐ uncomplicated malaria



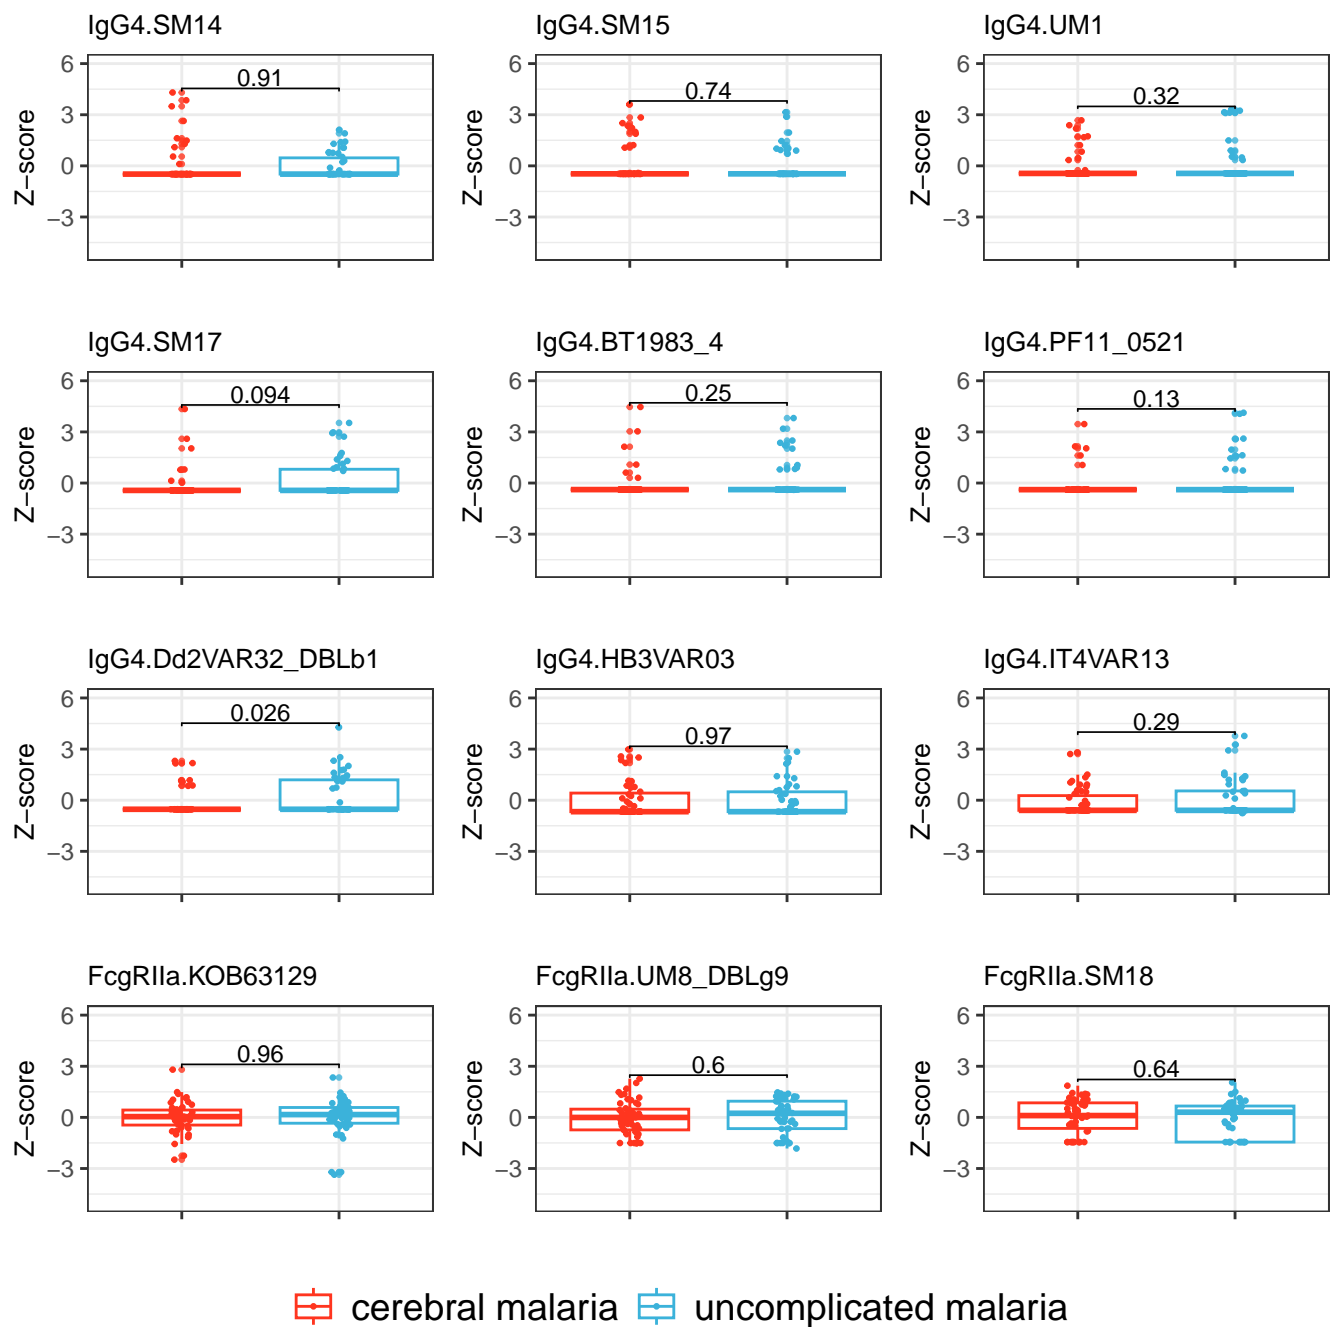

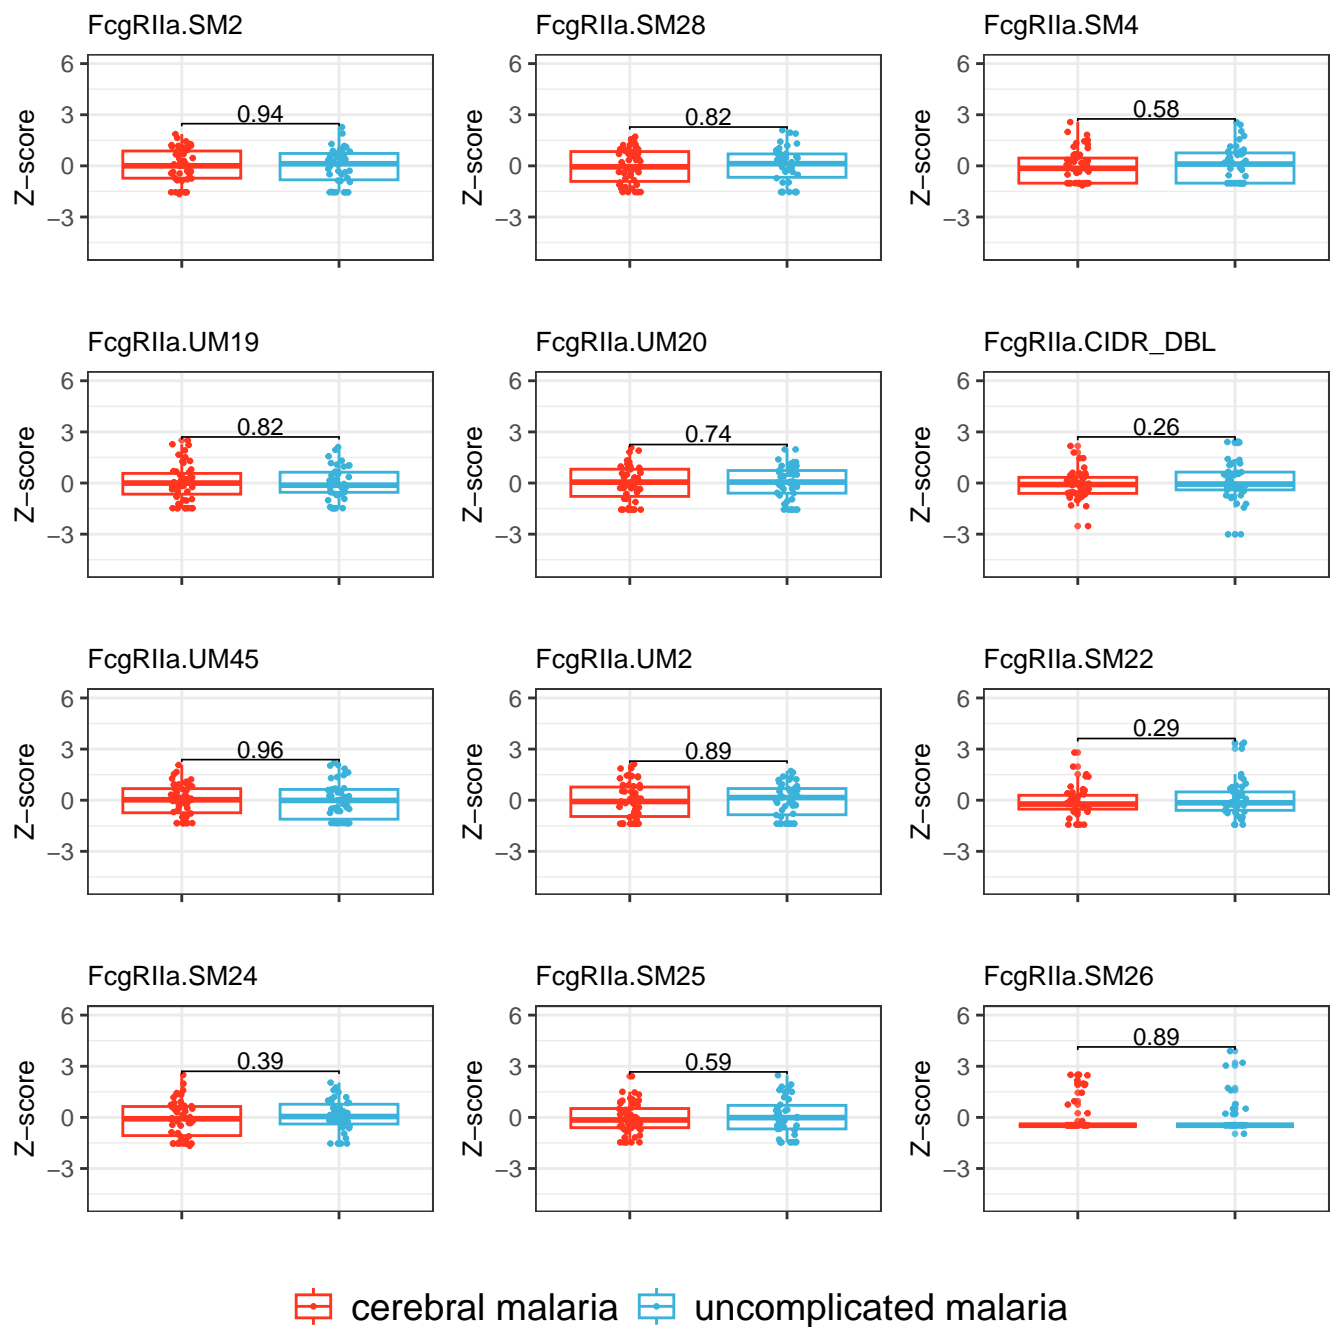

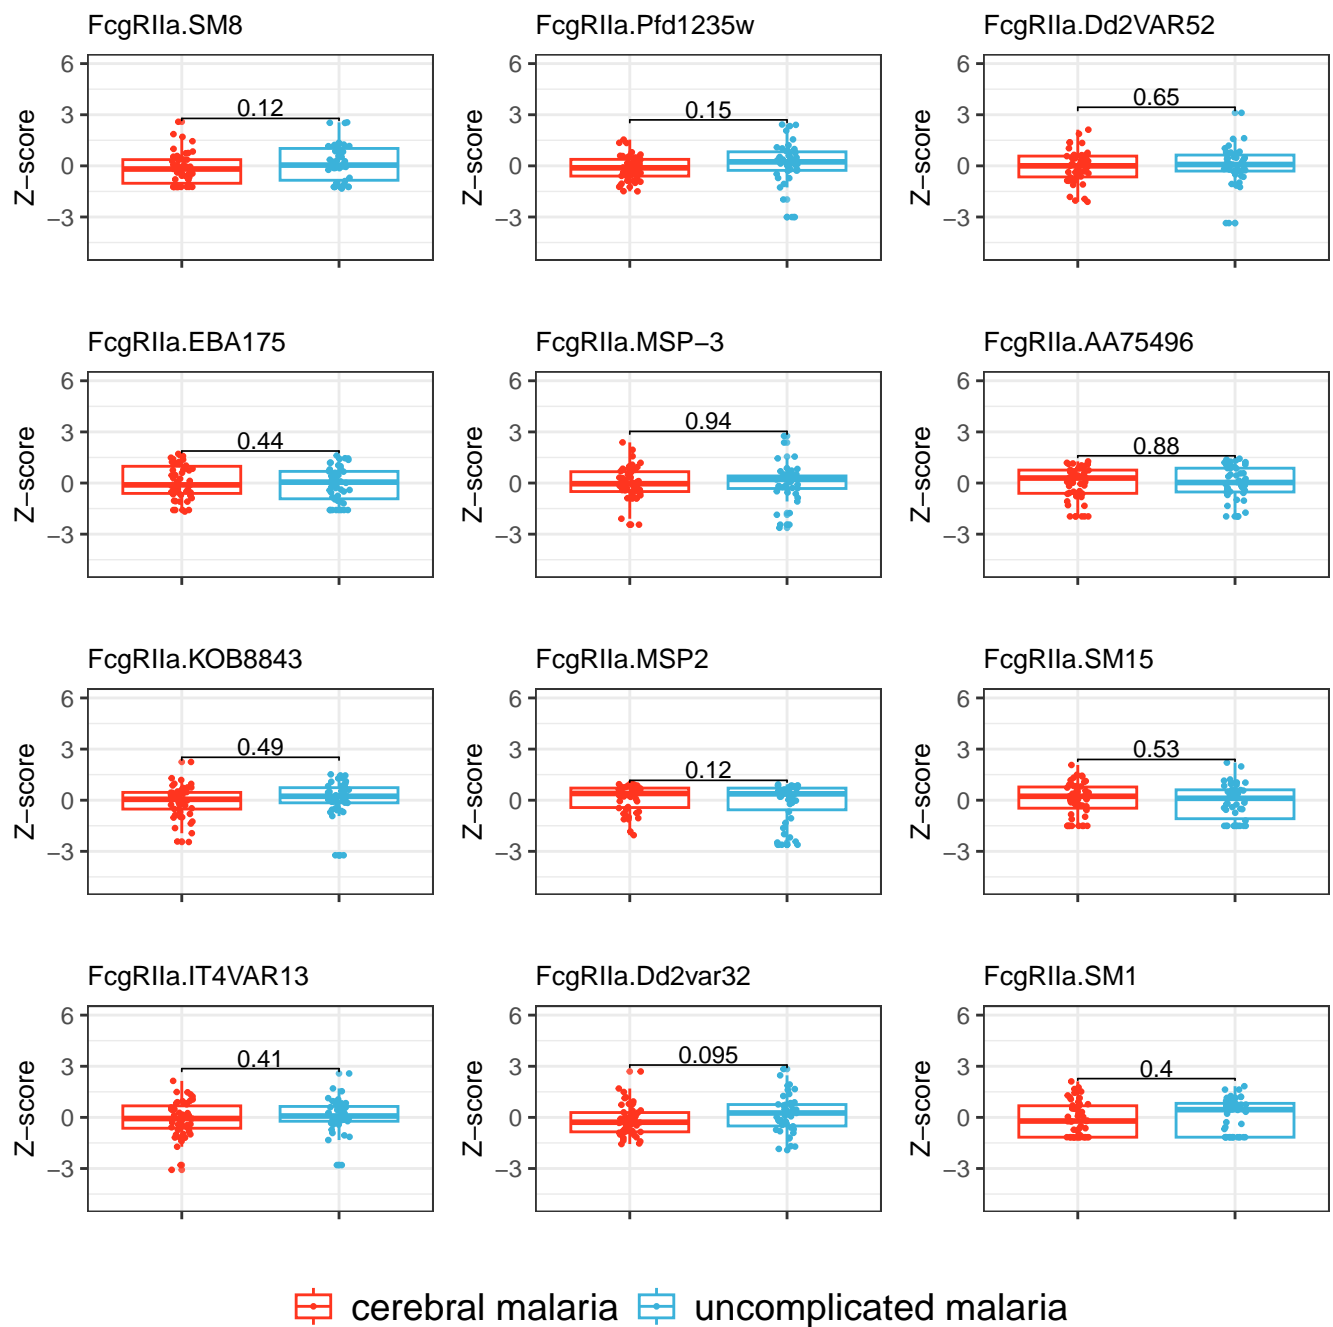

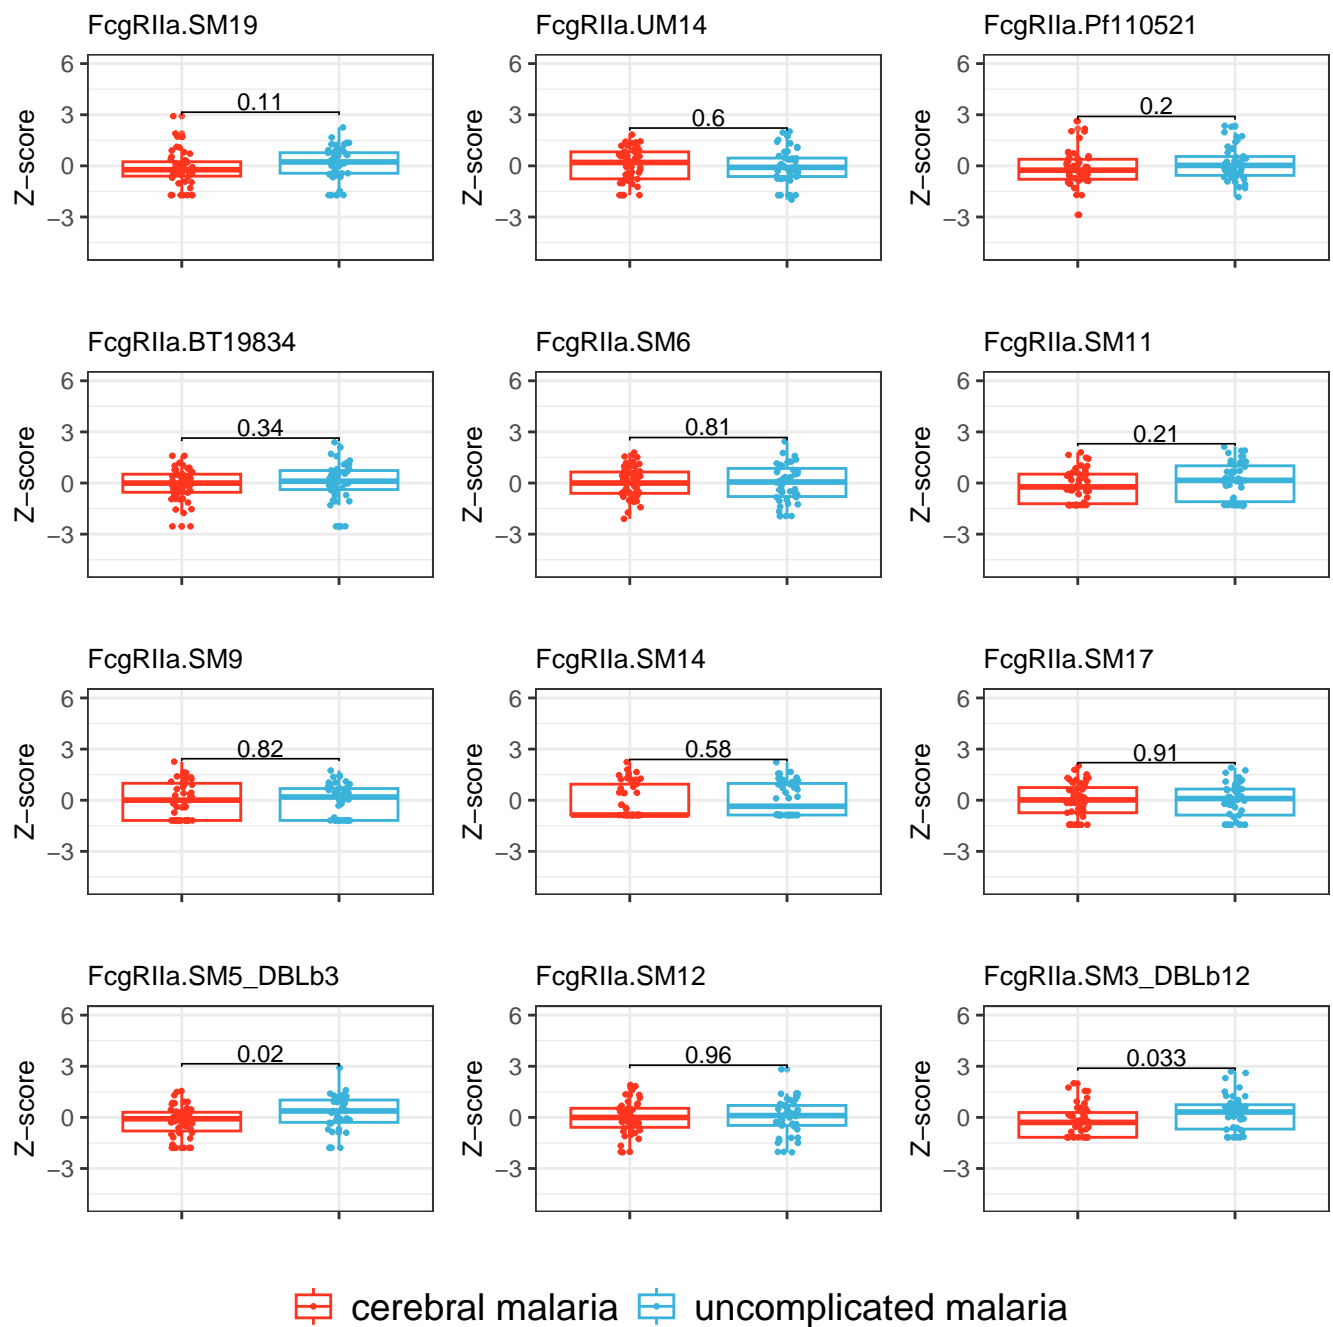

FcgRIIa.HB3var01

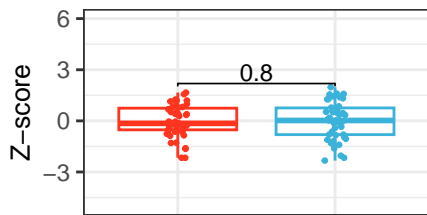

FcgRIIb.KOB63129

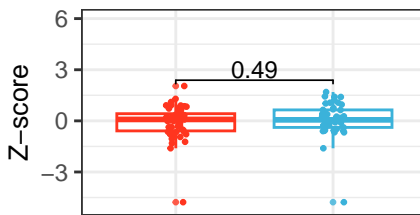

FcgRIIb.UM8

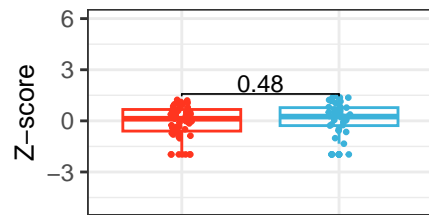

FcgRIIb.SM18

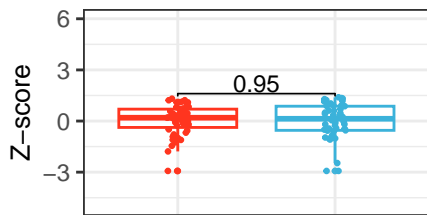

FcgRIIb.SM2

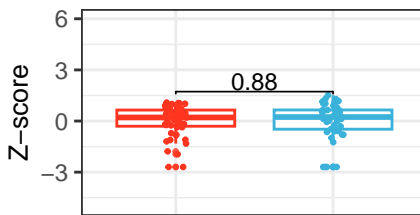

FcgRIIb.SM28

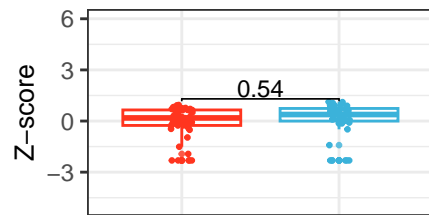

FcgRIIb.SM4

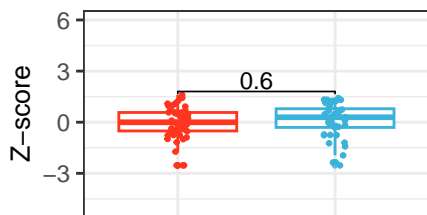

FcgRIIb.UM19

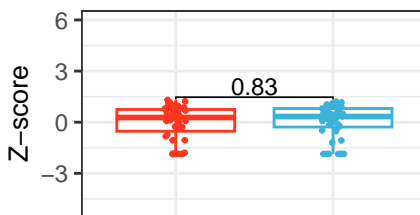

FcgRIIb.UM20

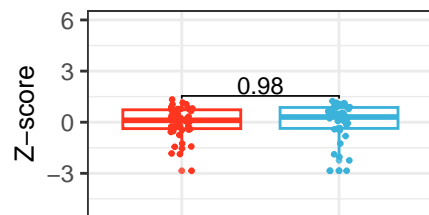

FcgRIIb.CIDR\_DBL

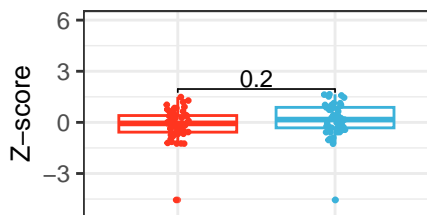

FcgRIIb.UM45

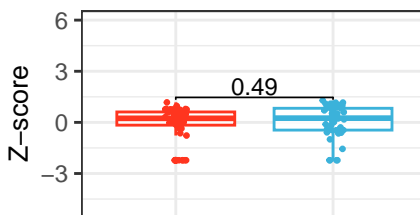

FcgRIIb.UM2

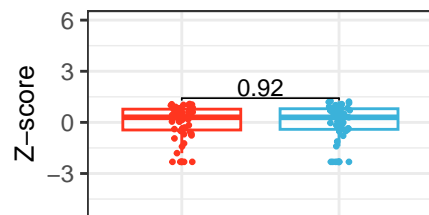

 cerebral malaria
  uncomplicated malaria

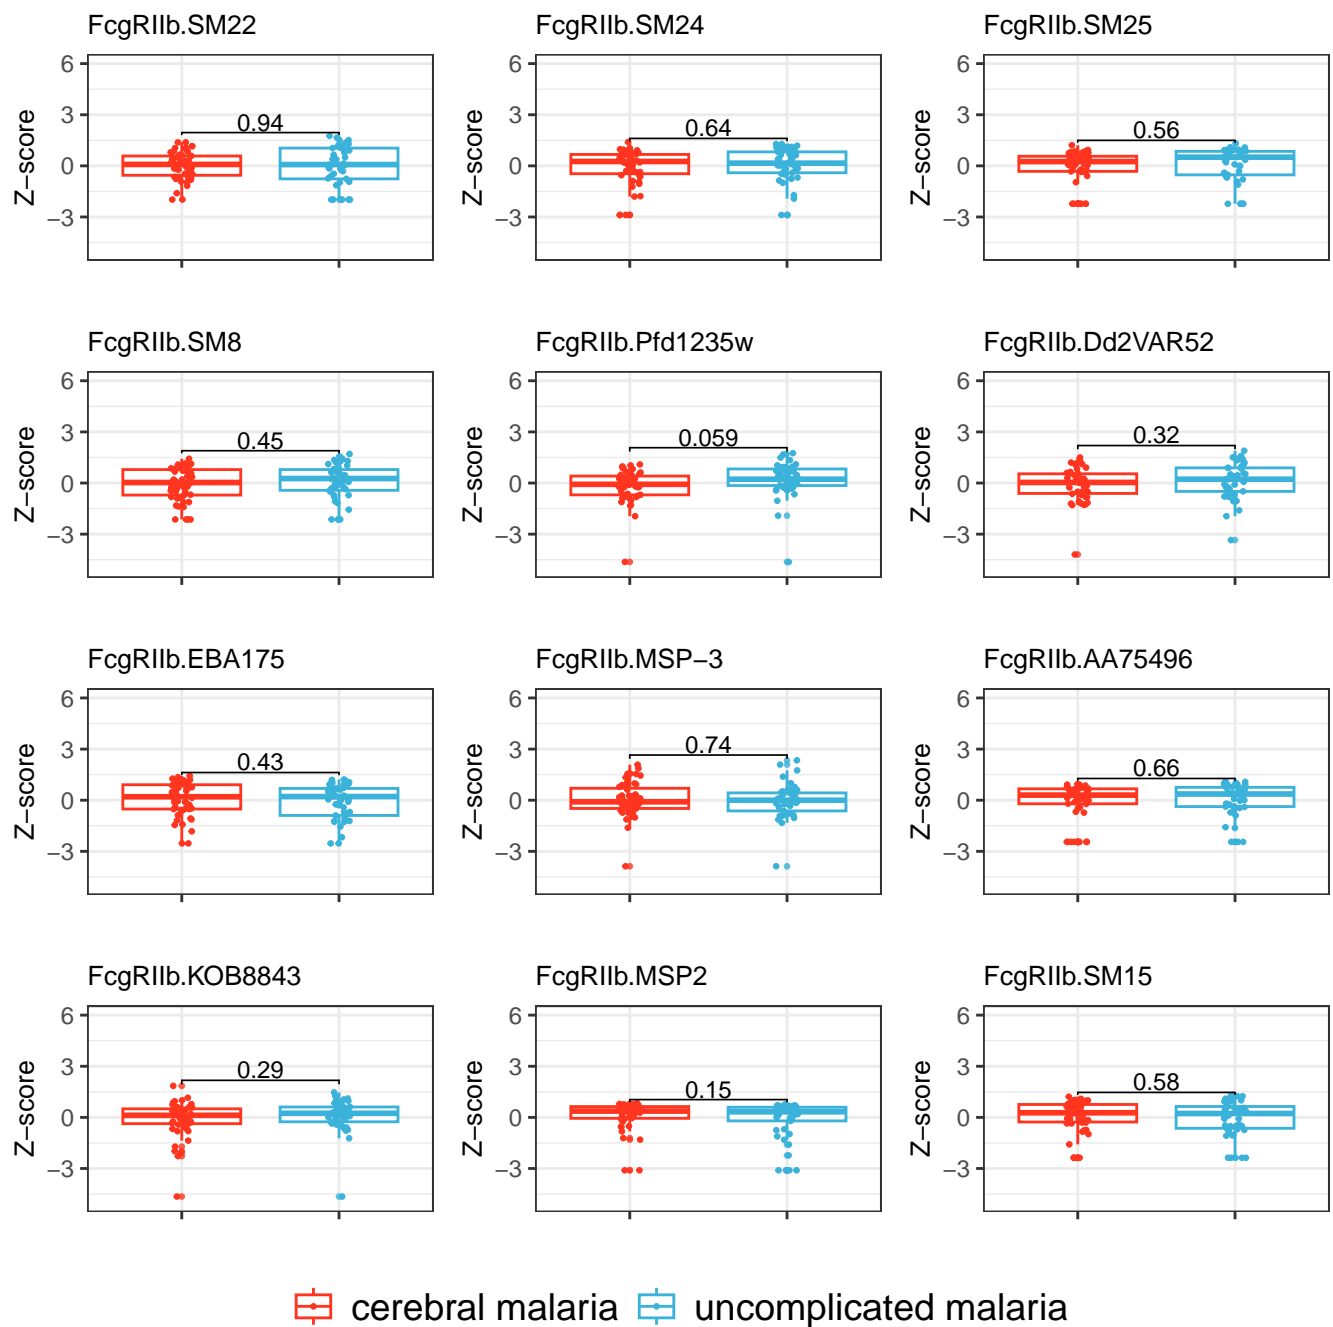

FcgRIIb.IT4VAR13

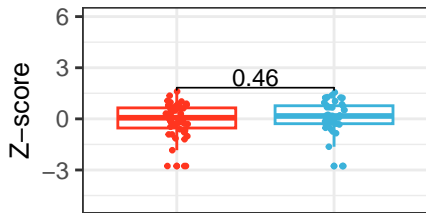

FcgRIIb.Dd2var32

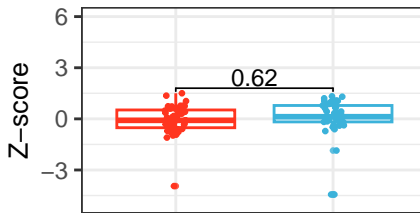

FcgRIIb.SM1

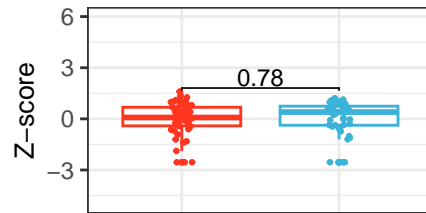

FcgRIIb.SM19

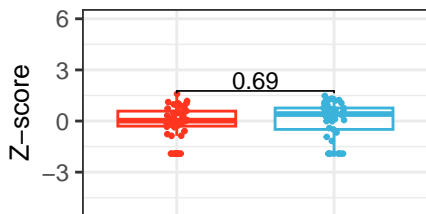

FcgRIIb.UM14

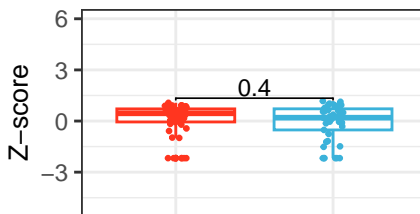

FcgRIIb.Pf110521

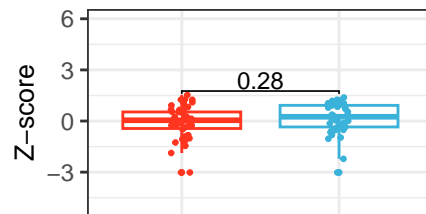

FcgRIIb.BT19834

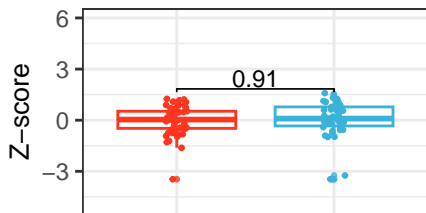

FcgRIIb.SM6

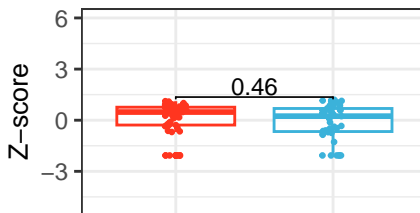

FcgRIIb.SM11

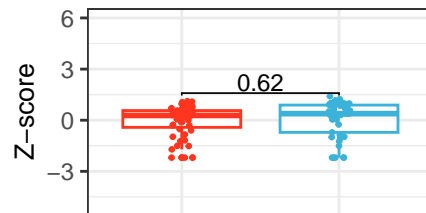

FcgRIIb.SM9

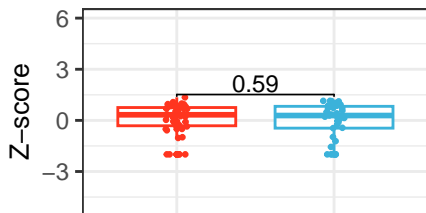

FcgRIIb.SM14

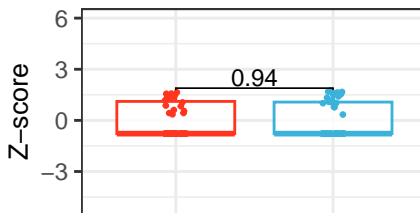

FcgRIIb.SM17

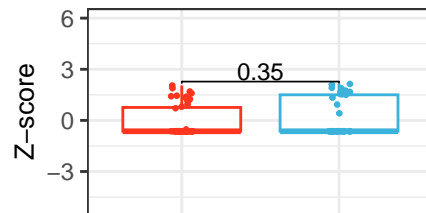

 cerebral malaria  uncomplicated malaria

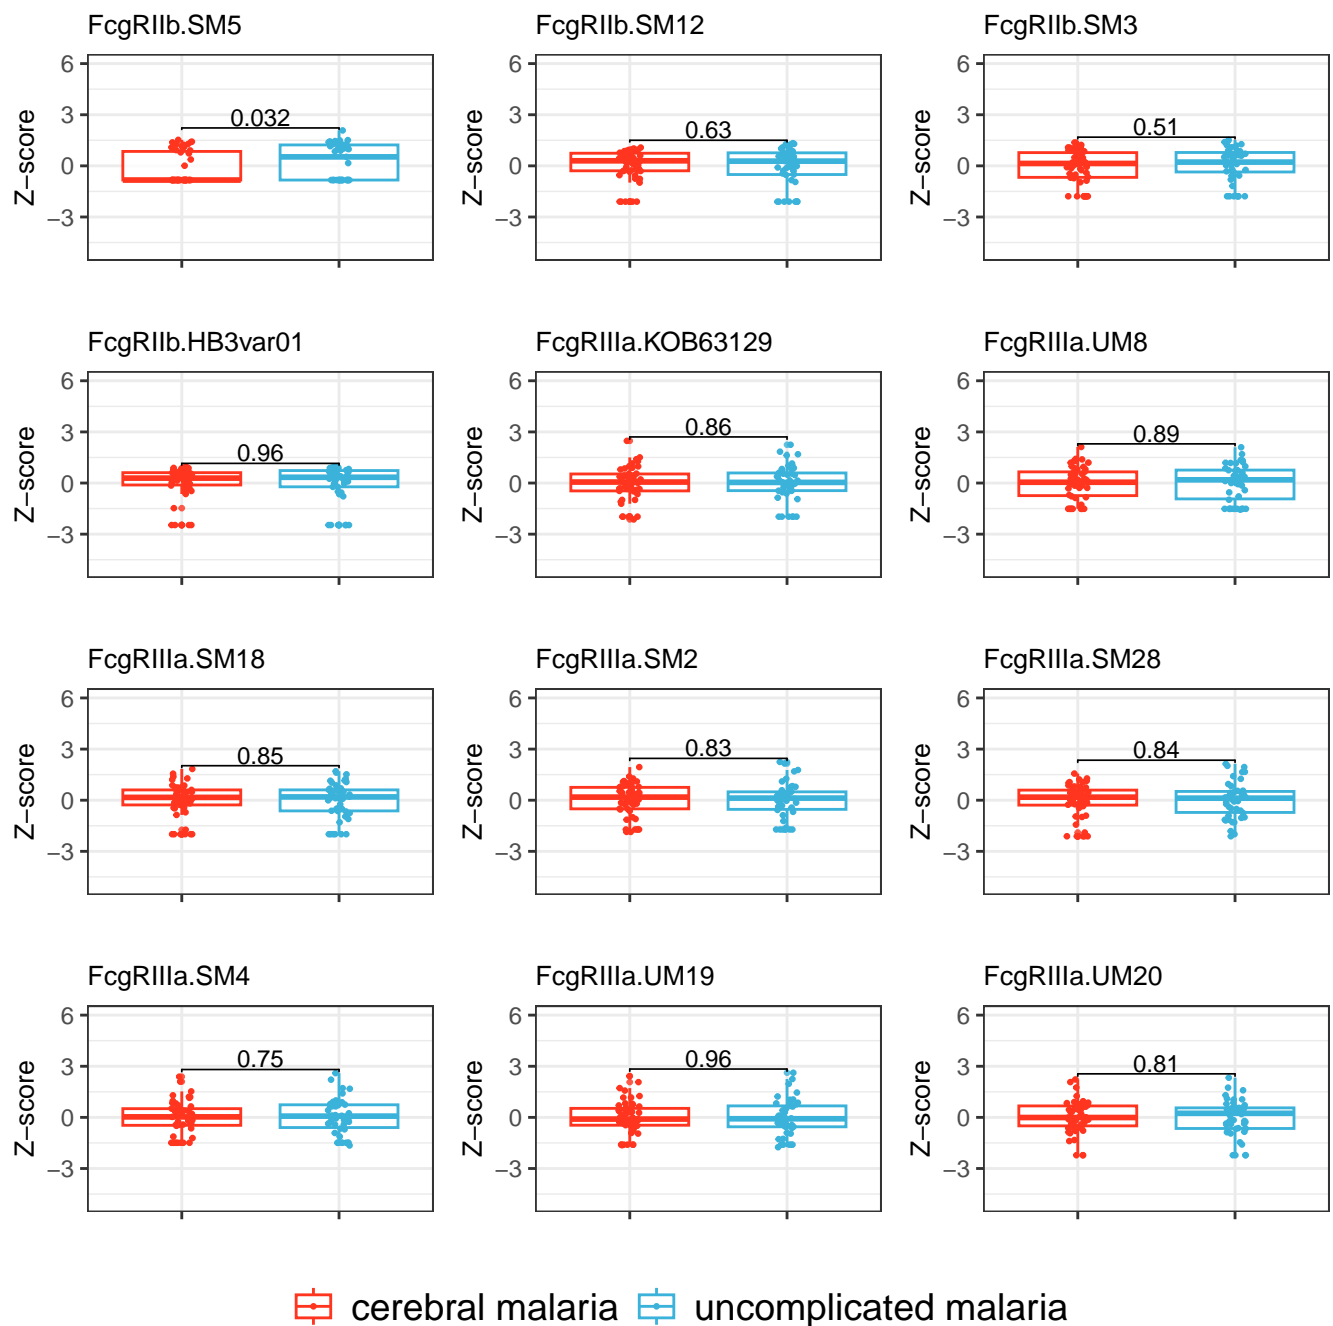



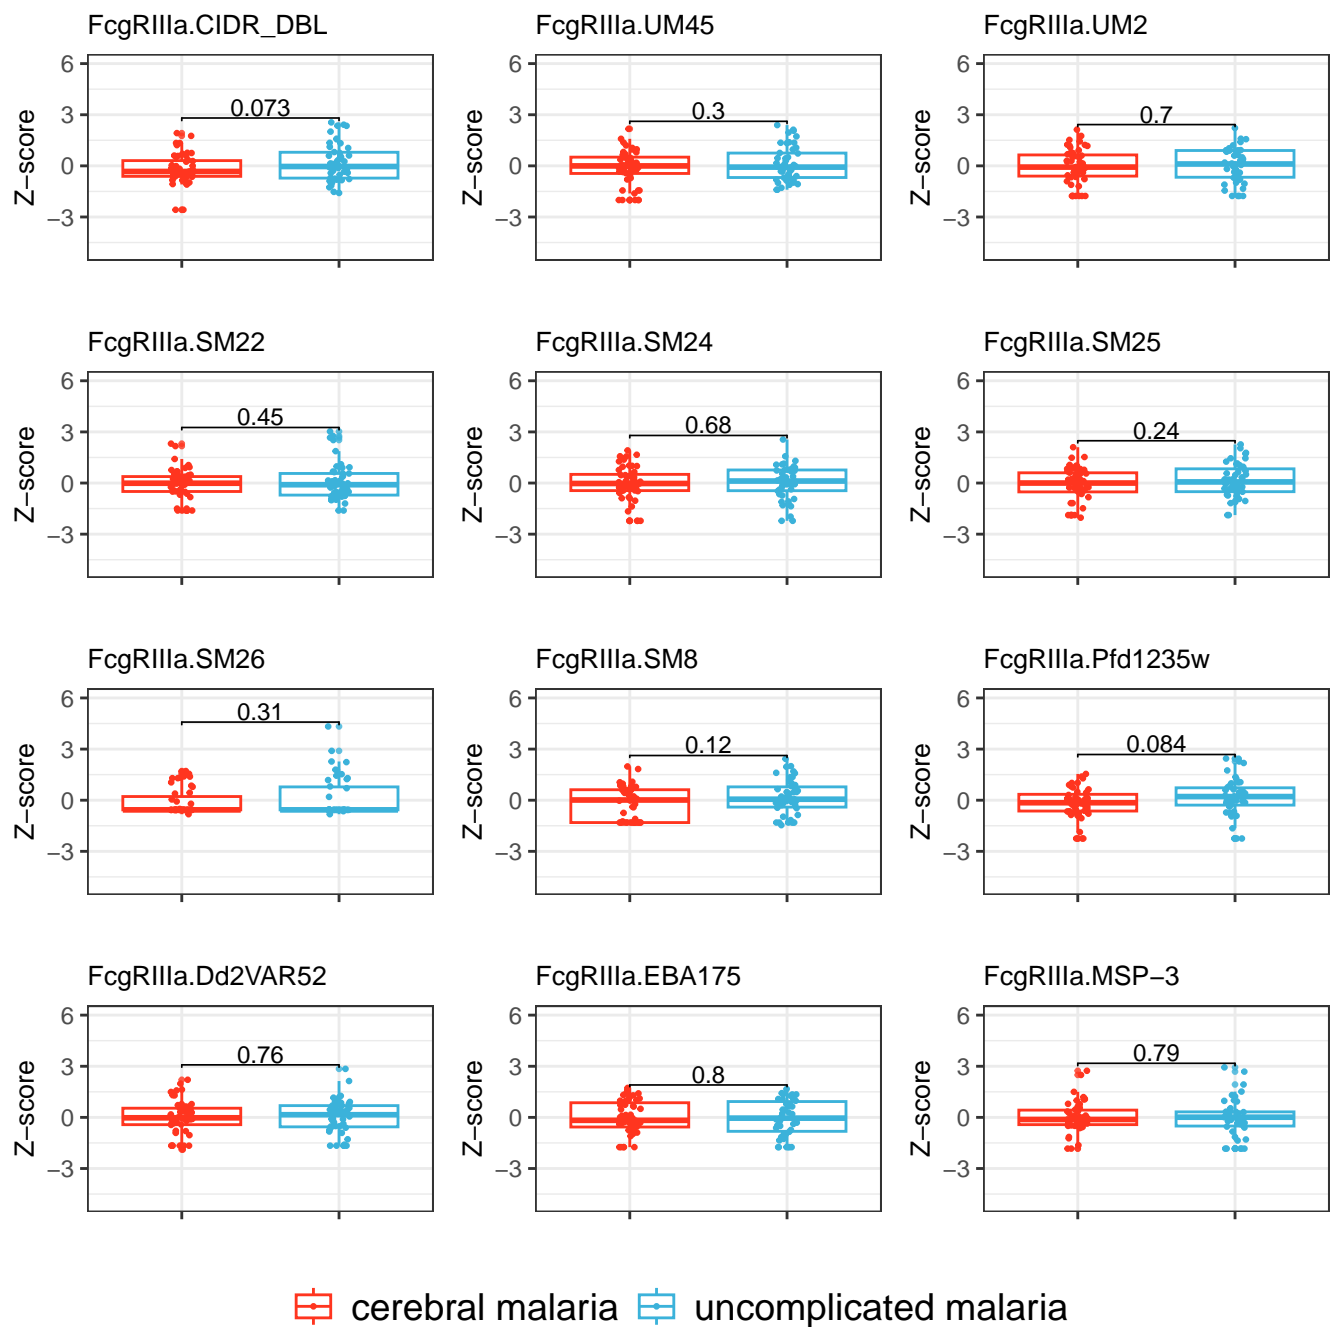

FcgRIIIa.AA75496

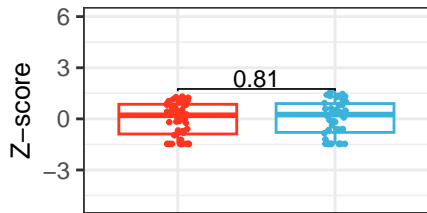

FcgRIIIa.KOB8843

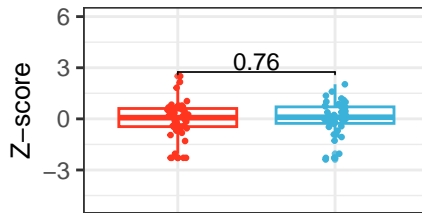

FcgRIIIa.MSP2

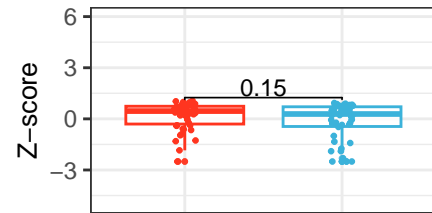

FcgRIIIa.SM15

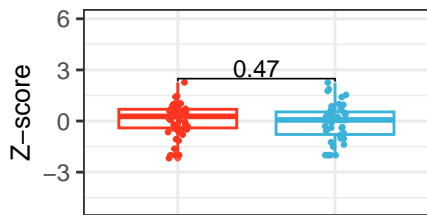

FcgRIIIa.IT4VAR13

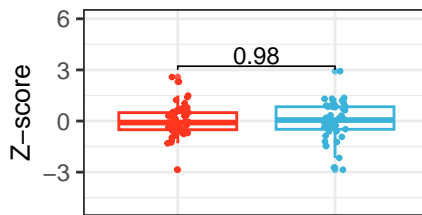

FcgRIIIa.Dd2var32

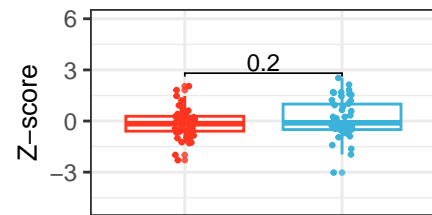

FcgRIIIa.SM1

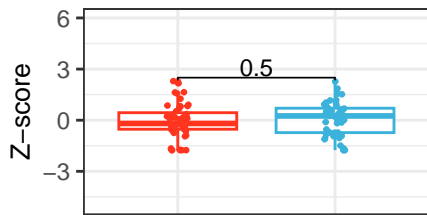

FcgRIIIa.SM19

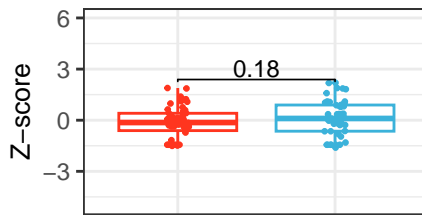

FcgRIIIa.UM14

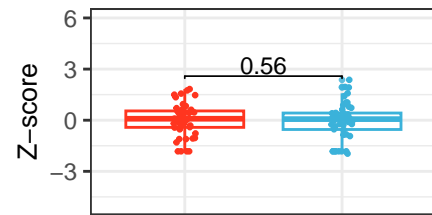

FcgRIIIa.Pf110521

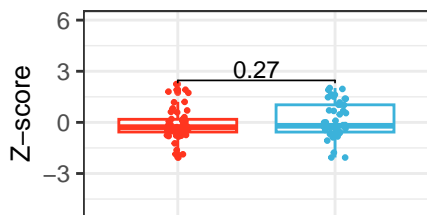

FcgRIIIa.BT19834

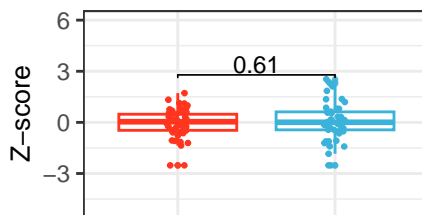

FcgRIIIa.SM6

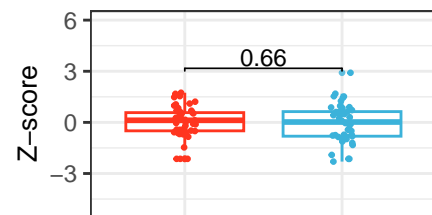

 cerebral malaria
  uncomplicated malaria

FcgRIIIa.SM11

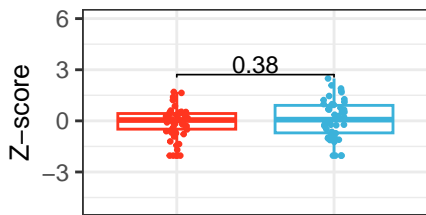

FcgRIIIa.SM9

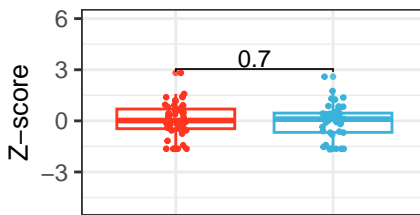

FcgRIIIa.SM14

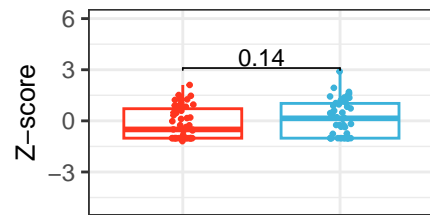

FcgRIIIa.SM17

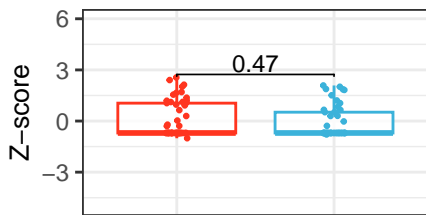

FcgRIIIa.SM5

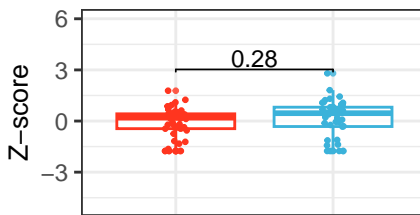

FcgRIIIa.SM12

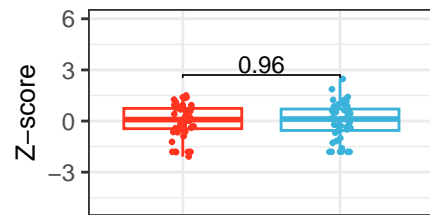

FcgRIIIa.SM3

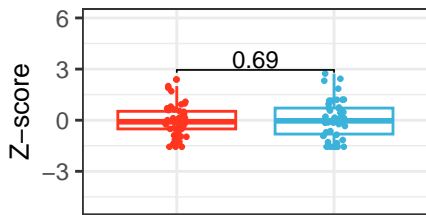

FcgRIIIa.HB3var01

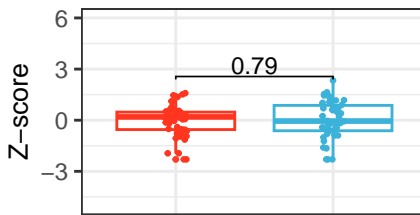

FcgRIIIb.KOB63129

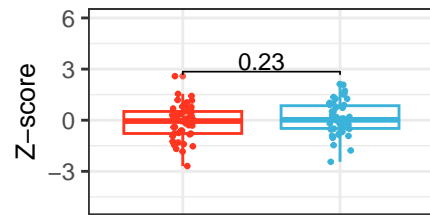

FcgRIIIb.UM8

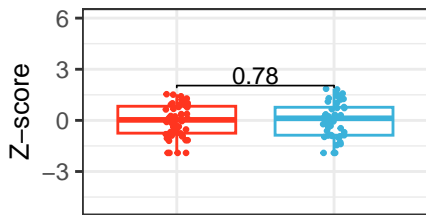

FcgRIIIb.SM18

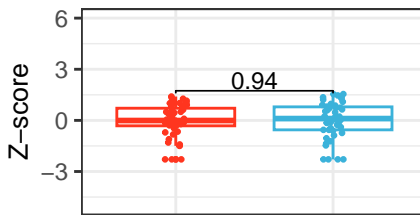

FcgRIIIb.SM2

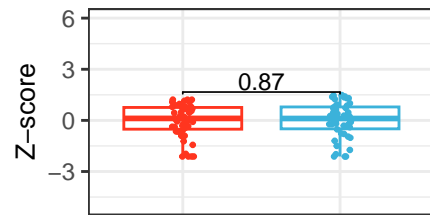

 cerebral malaria
  uncomplicated malaria

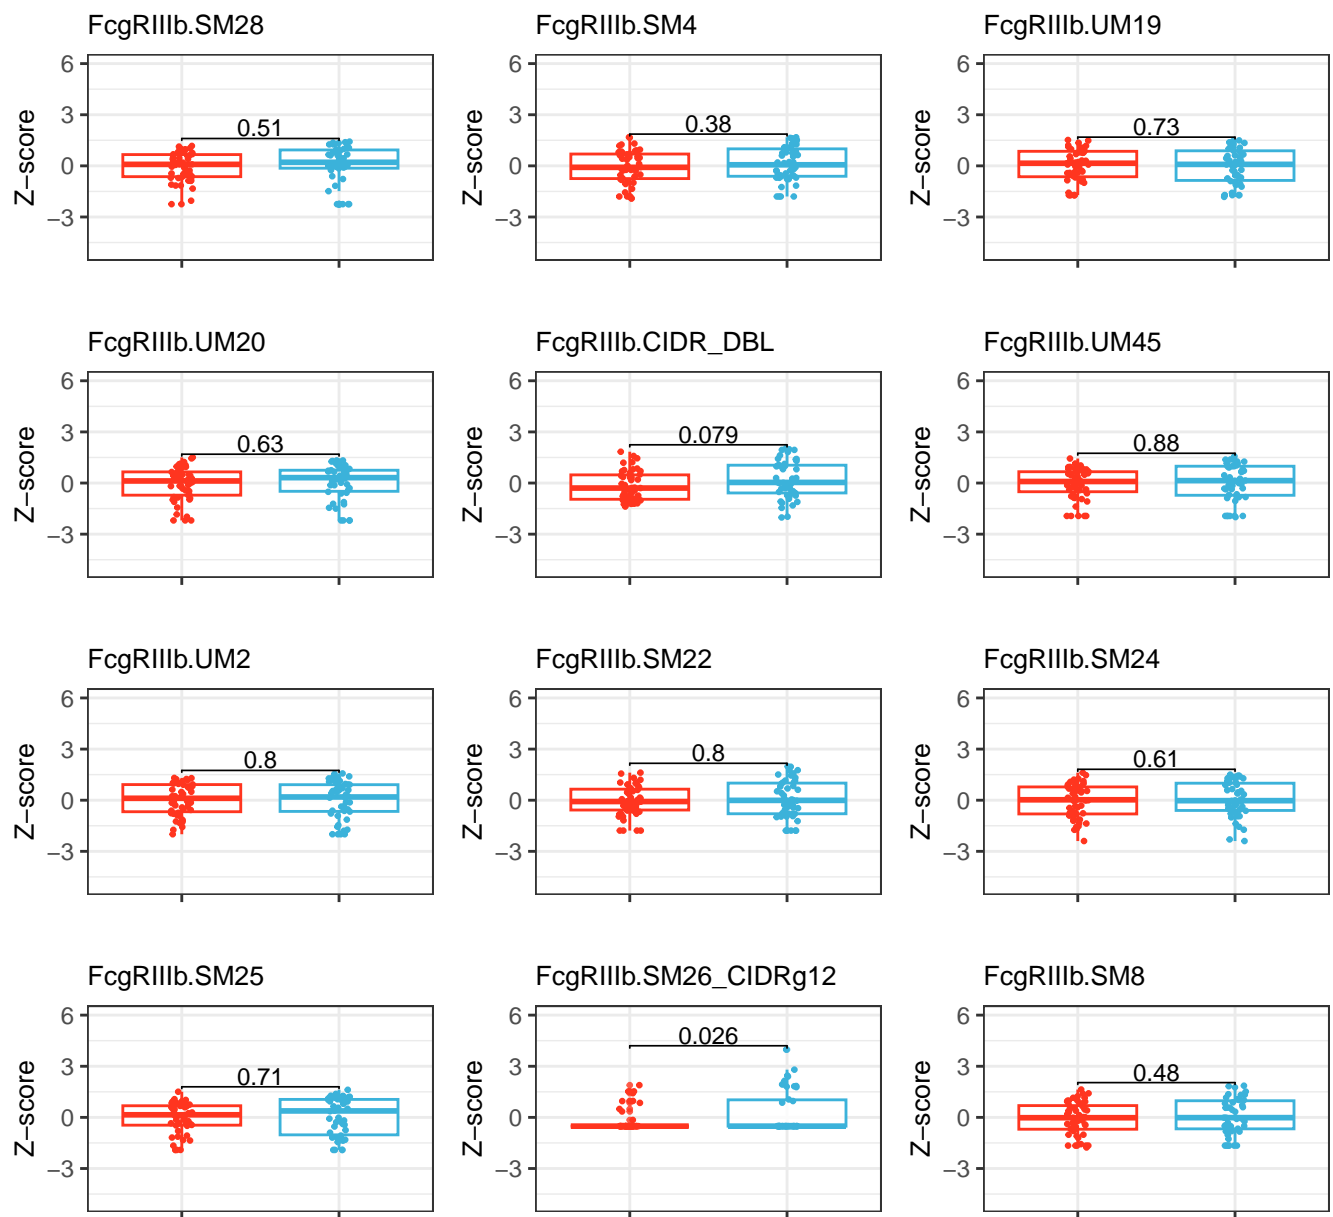

☐ cerebral malaria ☐ uncomplicated malaria

FcgRIIIB.Pfd1235w\_DBLb3

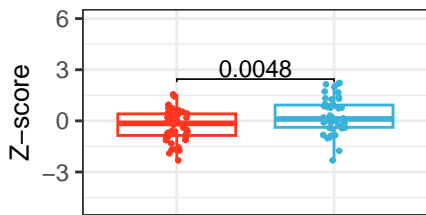

FcgRIIIB.Dd2VAR52

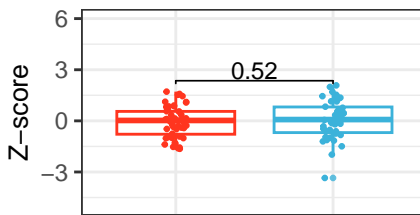

FcgRIIIB.EBA175

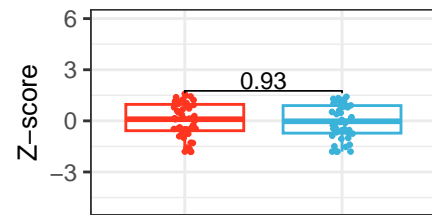

FcgRIIIB.MSP-3

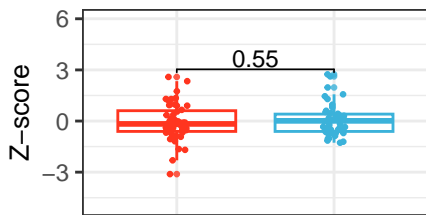

FcgRIIIB.AA75496

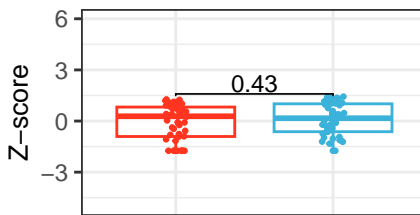

FcgRIIIB.KOB8843

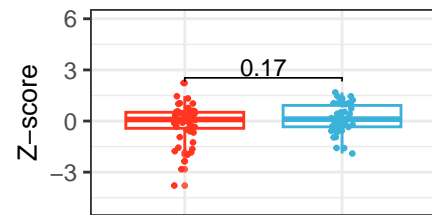

FcgRIIIB.MSP2

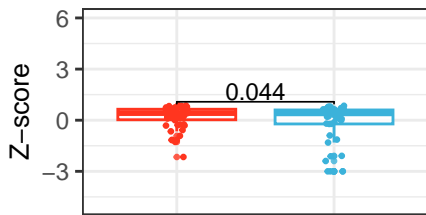

FcgRIIIB.SM15

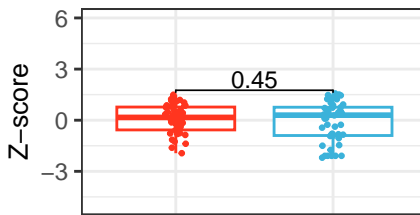

FcgRIIIB.IT4VAR13

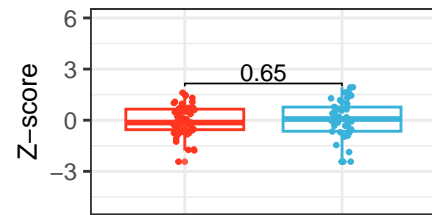

FcgRIIIB.Dd2var32

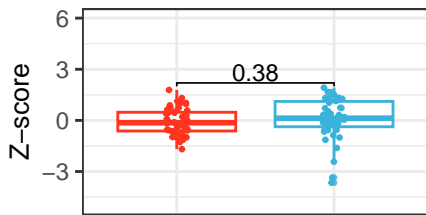

FcgRIIIB.SM1

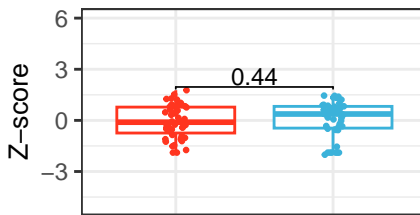

FcgRIIIB.SM19

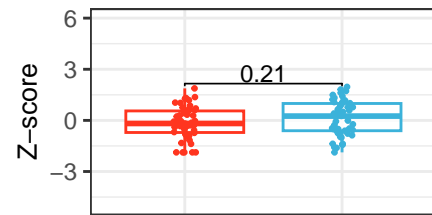

 cerebral malaria
  uncomplicated malaria

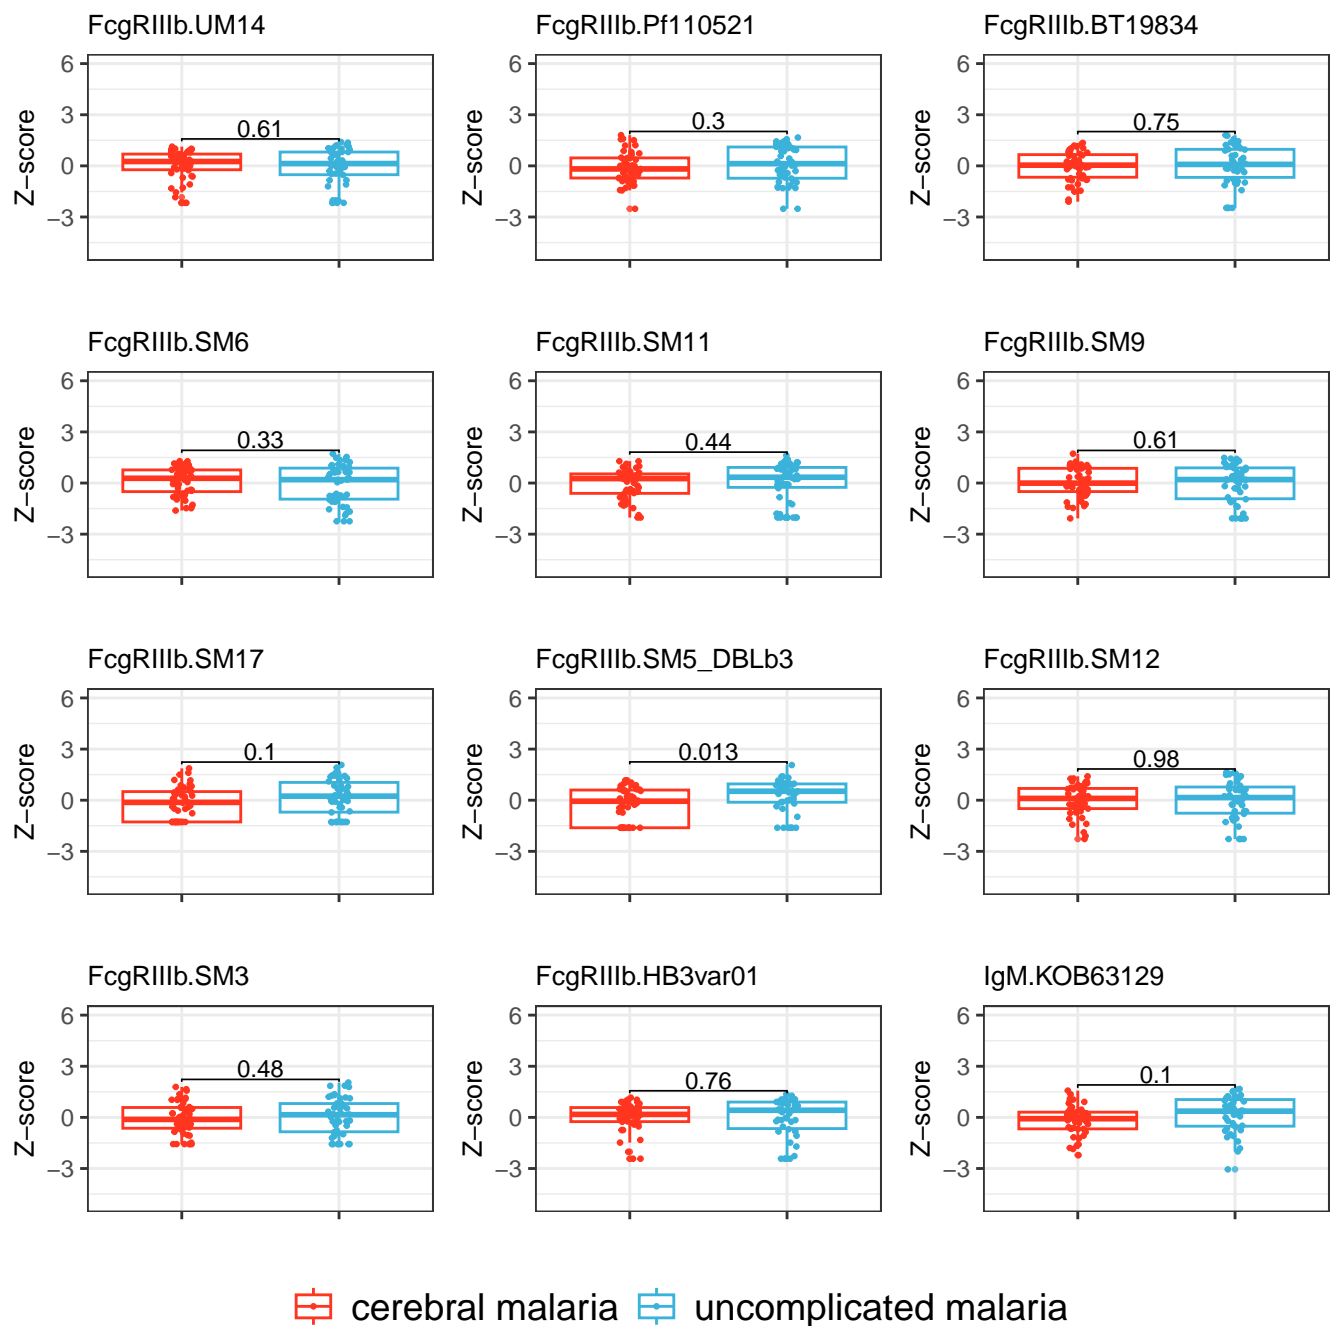

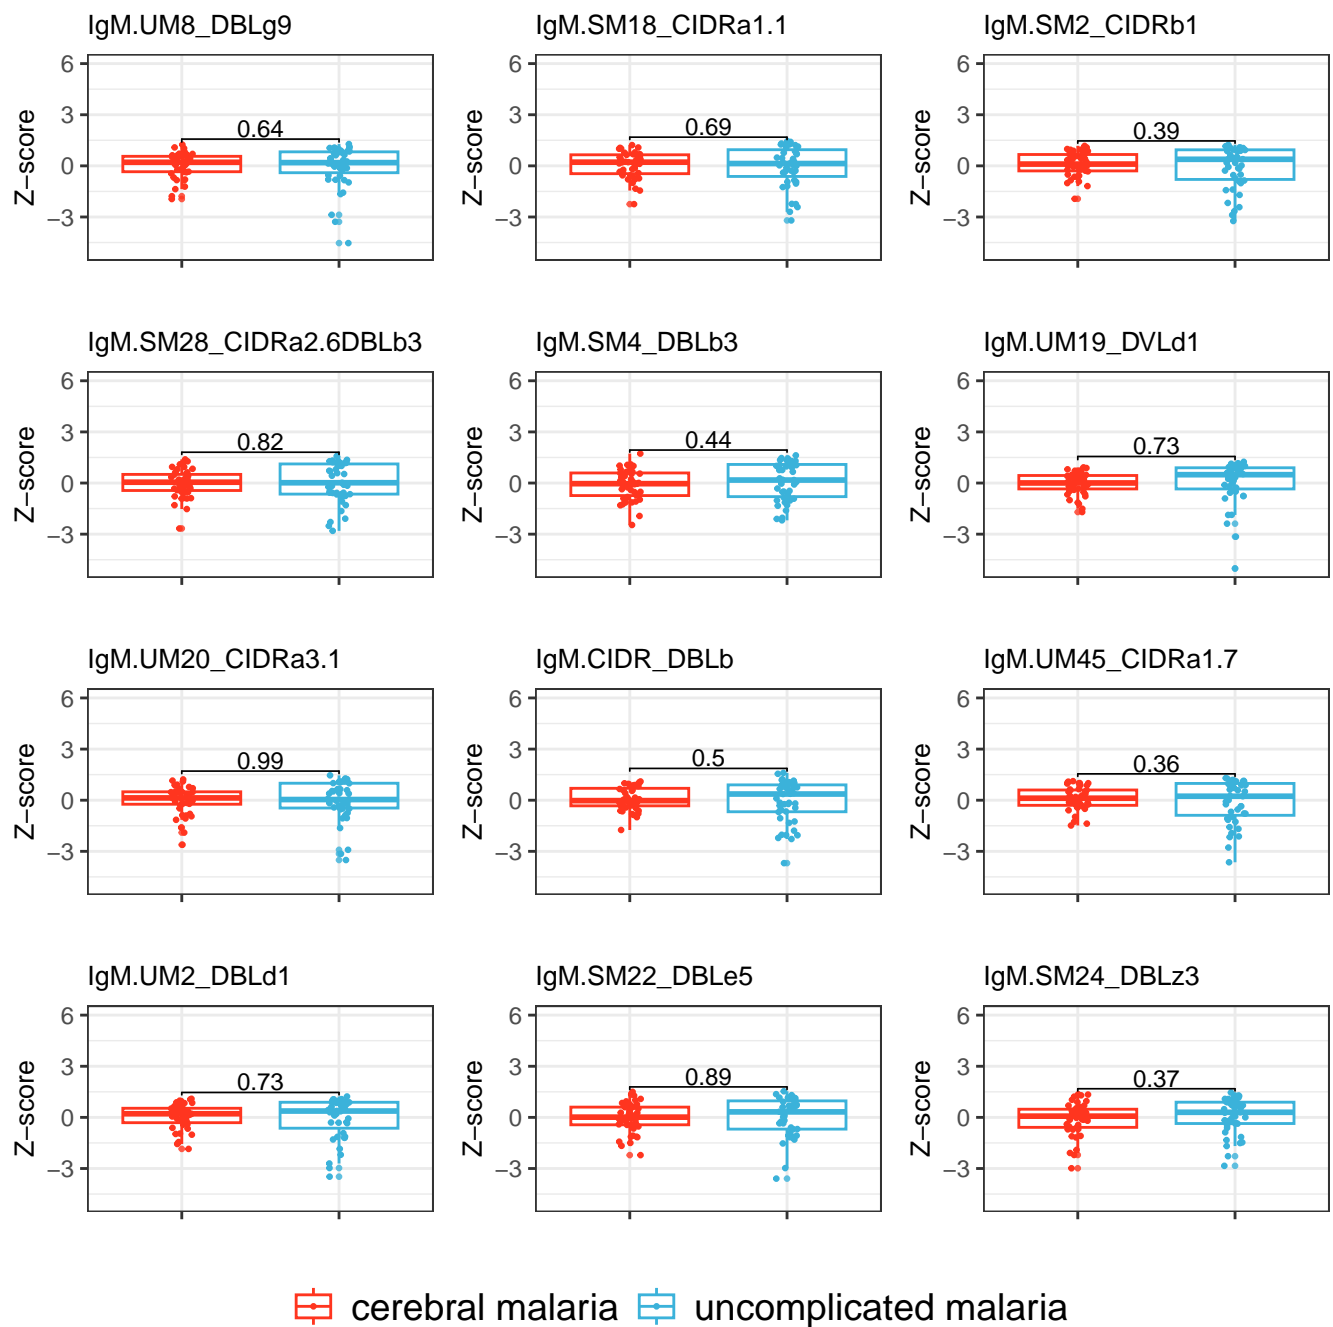

IgM.SM25\_DBLb1.3

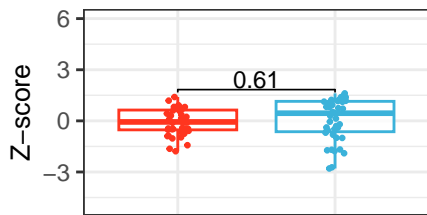

IgM.SM26\_CIDRg1.2

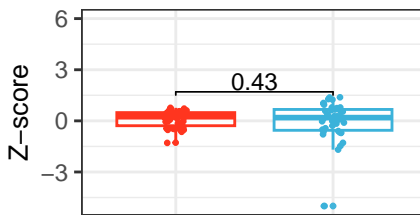

IgM.SM8\_DBLd1

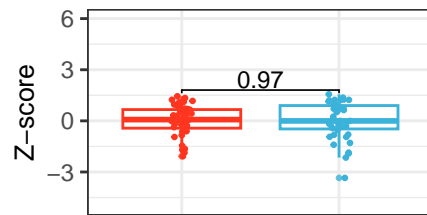

IgM.Pfd1235w

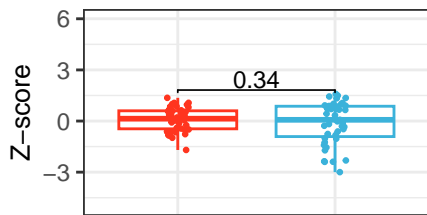

IgM.Dd2VAR52

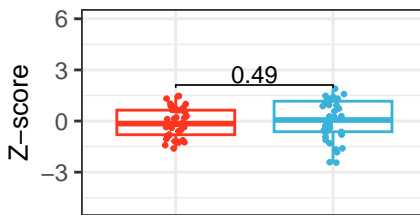

IgM.EBA175

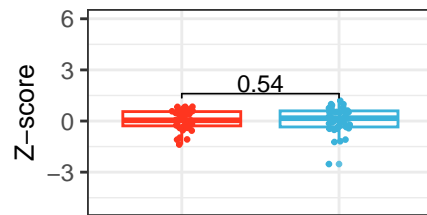

IgM.MSP3

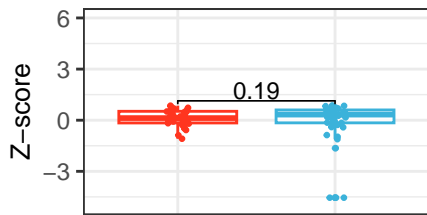

IgM.AA75496

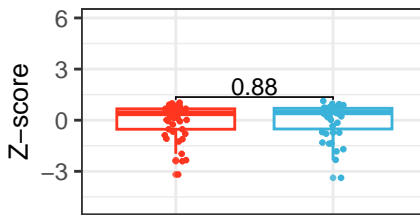

IgM.KOB8843

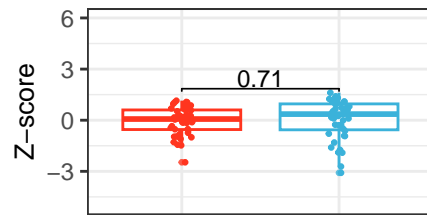

IgM.MSP2

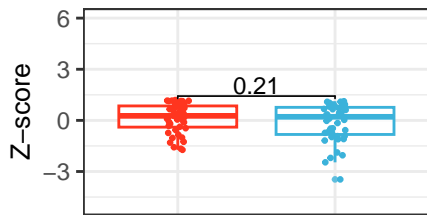

IgM.DBLz4

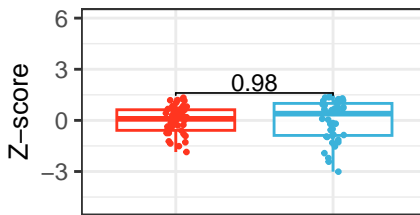

IgM.IT4VAR13

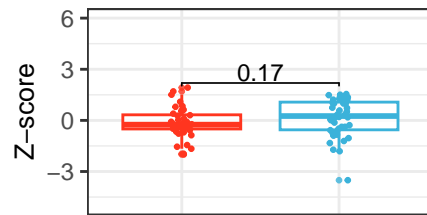

 cerebral malaria
  uncomplicated malaria



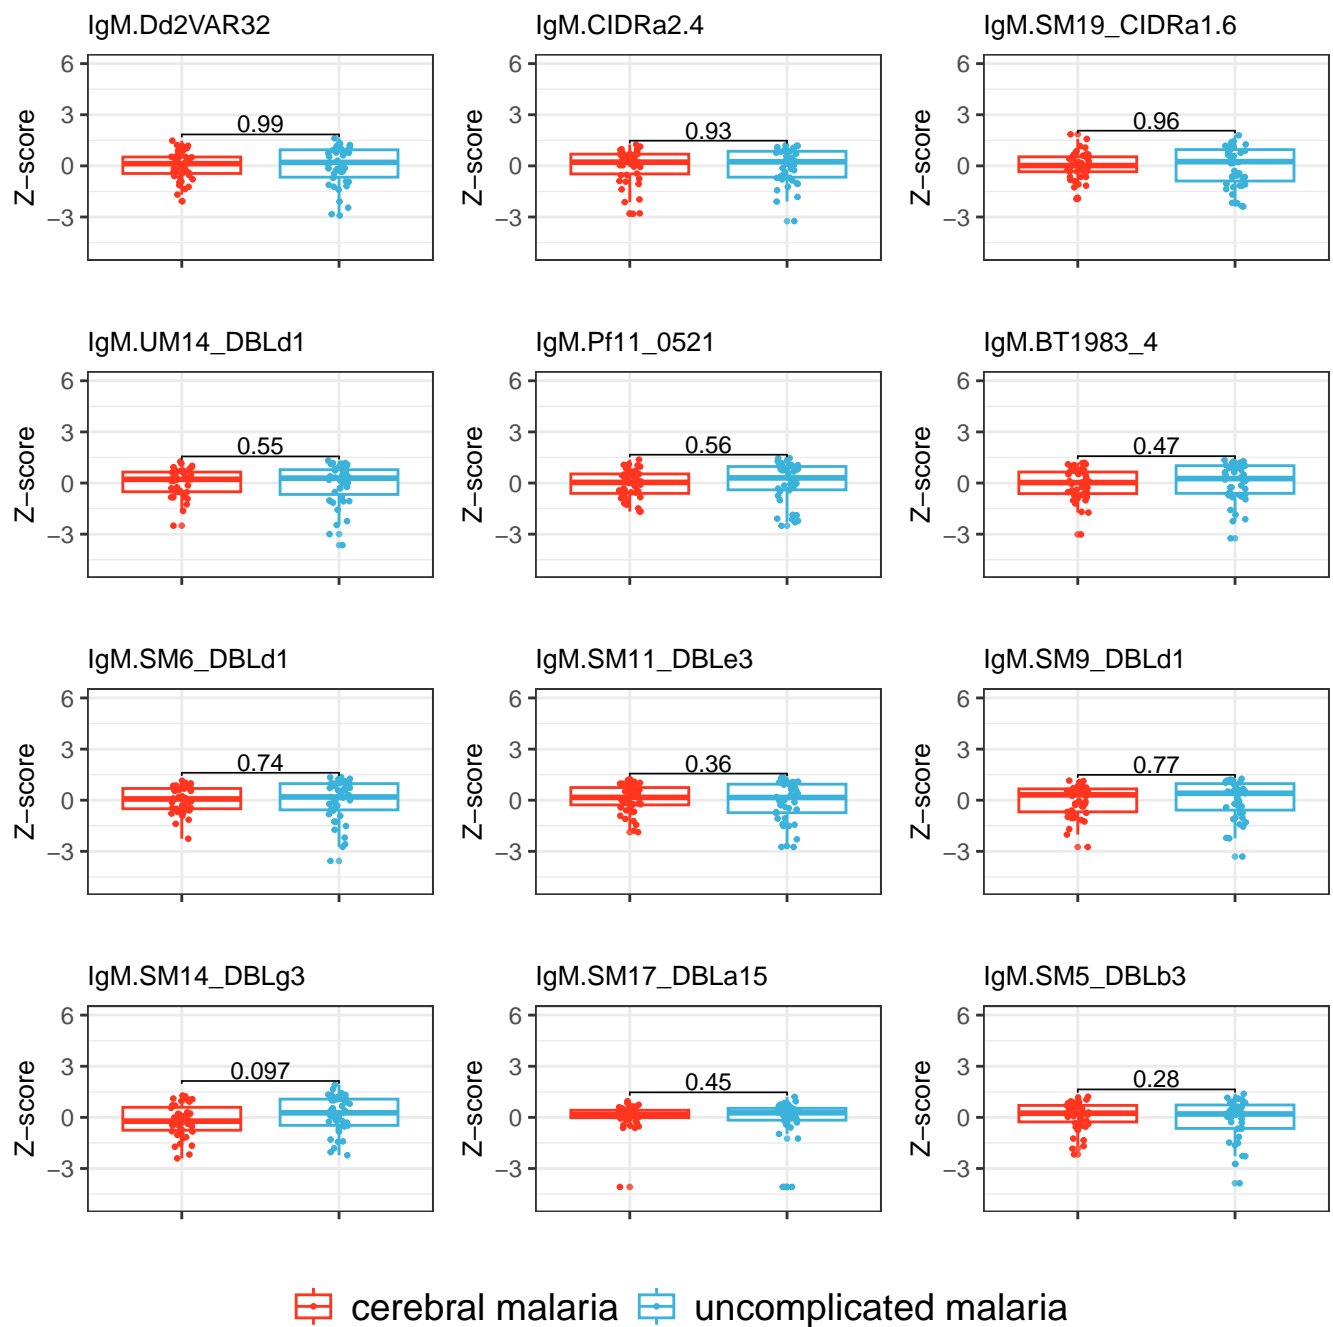

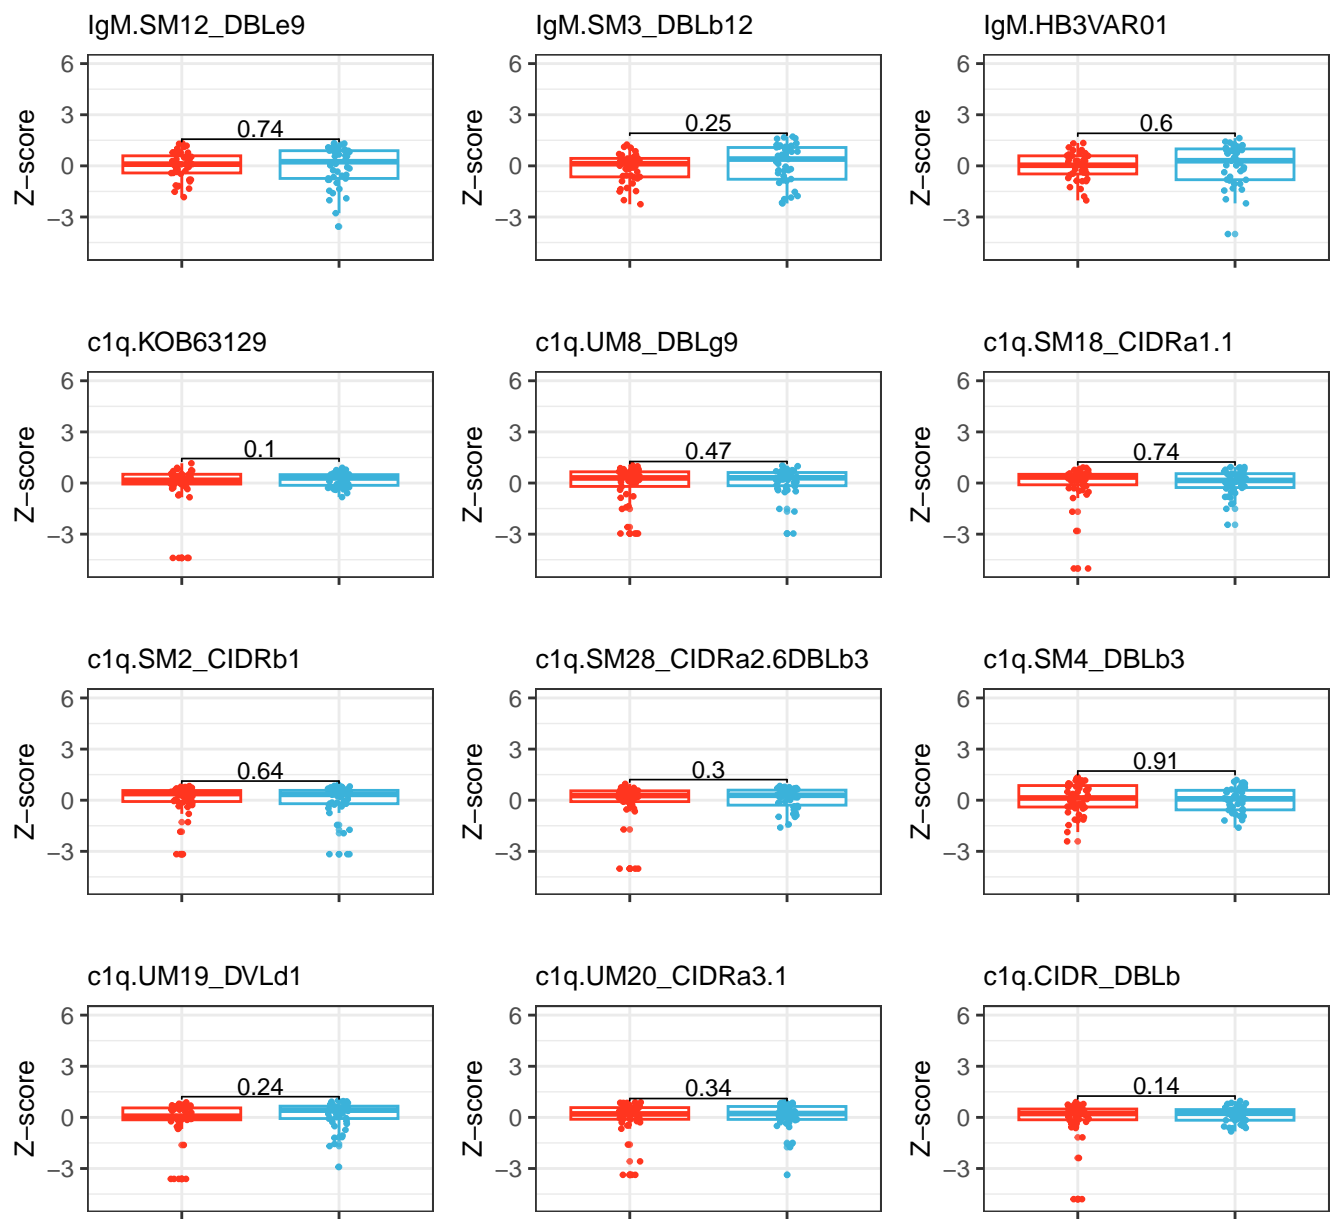

 cerebral malaria
  uncomplicated malaria

c1q.UM45\_CIDRa1.7

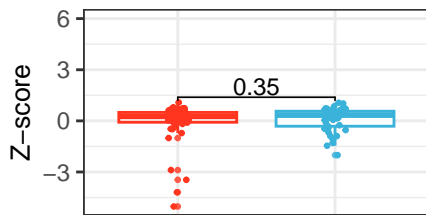

c1q.UM2\_DBLd1

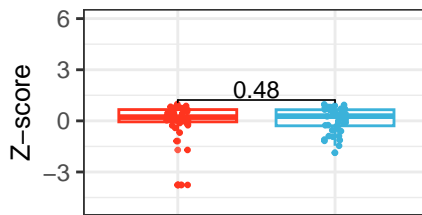

c1q.SM22\_DBLLe5

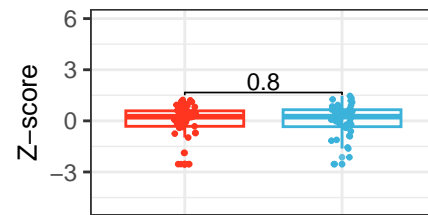

c1q.SM24\_DBLz3

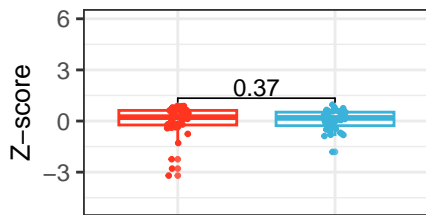

c1q.SM25\_DBLb1.3

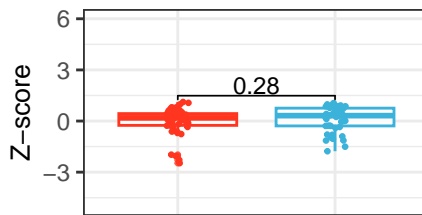

c1q.SM26\_CIDRg1.2

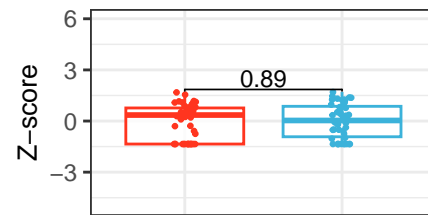

c1q.SM8\_DBLd1

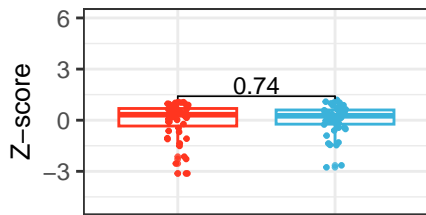

c1q.Pfd1235w

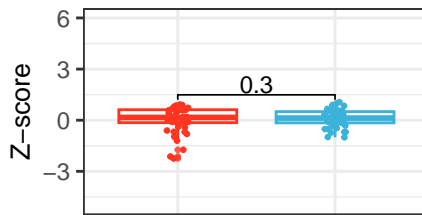

c1q.Dd2VAR52

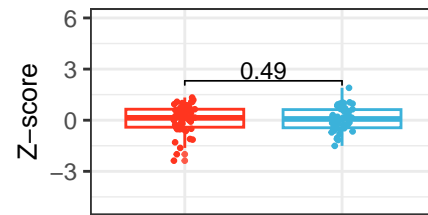

c1q.EBA175

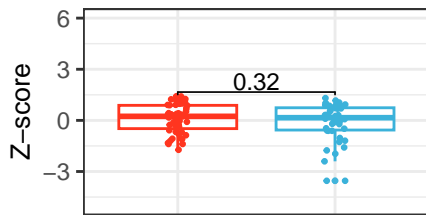

c1q.MSP3

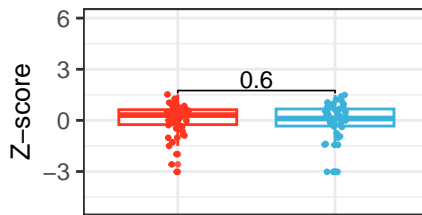

c1q.AA75496

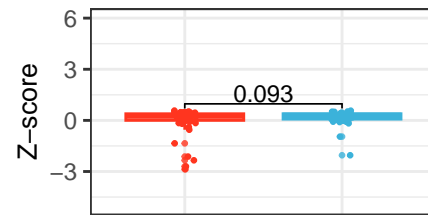

 cerebral malaria  uncomplicated malaria

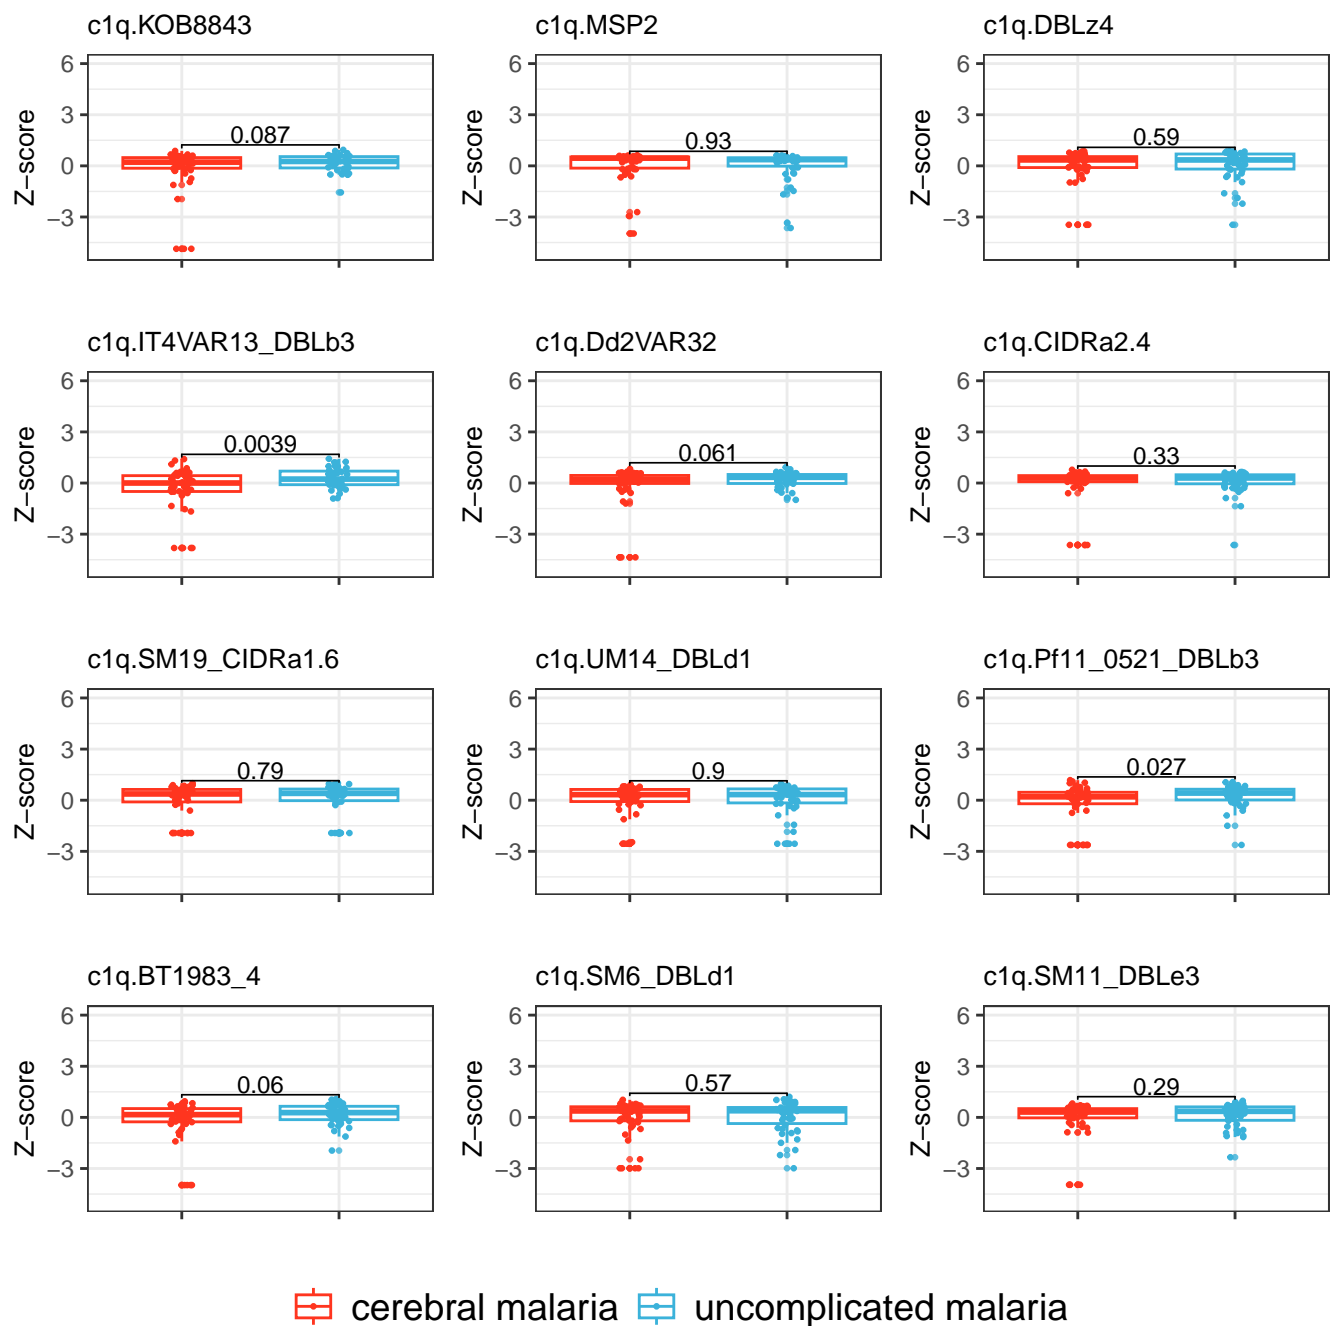

c1q.SM9\_DBLd1

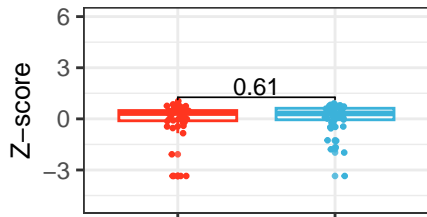

c1q.SM14\_DBLg3

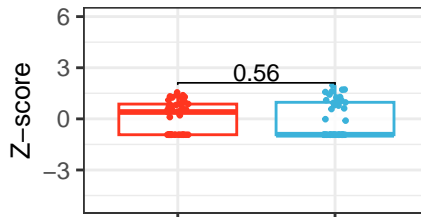

c1q.SM17\_DBLa15

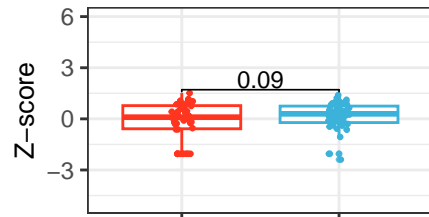

c1q.SM12\_DBLe9

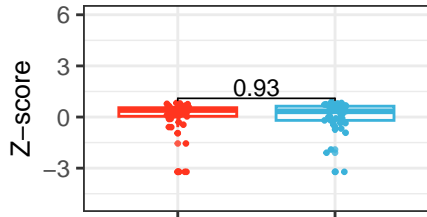

c1q.SM3\_DBLb12

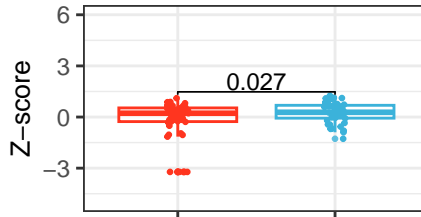

c1q.HB3VAR01

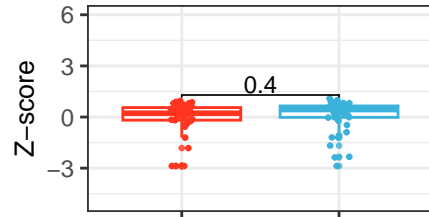

 cerebral malaria
  uncomplicated malaria
